# Supplementary material for: Fast, high-throughput production of improved rabies viral vectors for specific, efficient and versatile transsynaptic retrograde labeling
Source: eLife. 2022 Aug 30;11:e79848. doi: 10.7554/eLife.79848 (PMC9477495; doi:10.7554/eLife.79848)
Supplement: Figure 1—source data 1. — Tables for Figure 1F and G show the fractions of labeled cells obtained using FACS analysis at the indicated days post transduction and table for Figure 1H details viral titers for 37 individual productions, along with the identity of each vector and the raw data used to calculate the titer (colored columns to the left). [file elife-79848-fig1-data1.xlsx]

## Sheet: Sheet1
Figure 1F									Figure 1G
Fraction of labeled cells from total cell count (%)
293GT		N2c-GFP	N2c-Tomato	N2c-nlGFP-tomato	Average	SEM			BHKeT		N2c-GFP	N2c-Tomato	N2c-nlGFP-tomato	Average	SEM
	Day1	14	2.8	5.2	7.33333	3.40457				Day1	72.4	37.6	33.9	47.9667	12.2633
	Day2	99	44.4	86.6	76.6667	16.5257				Day2	88.4	75.2	86	83.2	4.05956
	Day3	99.7	99.6	99.5	99.6	0.057735				Day3	84.9	71.4	86.9	81.0667	4.86769
										Day4	82.1	66.4	87.8	78.7667	6.39852
Figure 1H
RV titer calculation
Vol of virus (ul)	Cells at DPI0	% transduced at DPI3		Prep #	Strain	Coat	Content	titer TU/ml
0.0001	87000	5		1	B19	envA	GFP+SypRFP	4.46252e+10
0.01	130000	9.2		2	B19	envA	GFP+TetR	1.25464e+09
0.01	130000	14		3	B19	envA	GFP+SypRFP	1.9607e+09
0.01	130000	1.4		4	N2c	envA	tdTomato	1.83286e+08
0.01	120000	3.4		5	N2c	envA	ChR2-EYFP	4.15097e+08
0.01	120000	4.9		6	N2c	envA	EGFP	6.02895e+08
0.001	70000	1.3		7	N2c	envA	tdTomato-ChIEF	9.15967e+08
0.0001	120000	1		8	N2c	envA	tdTomato-FlpO	1.20604e+10
0.0001	120000	1		9	N2c	envA	EGFP-iCre	1.20604e+10
0.0001	120000	5.4		10	N2c	envA	EGFP-FlpO	6.66153e+10
0.0001	50000	5.2		11	B19	envA	tdTomato	2.67004e+10
0.01	90000	1.6		13	N2c	envA	E2-Crimson	1.45164e+08
0.001	50000	2.4		14	N2c	envA	EGFP.nls-FlpO	1.21463e+09
0.001	50000	2		15	N2c	envA	mCherry.nls-FlpO	1.01014e+09
0.0001	80000	1.2		19	N2c	envA	EGFP-ChIEF	9.65806e+09
0.0001	70000	1.7		21	N2c	envA	EGFP.nls-tdTomato	1.20023e+10
0.0001	70000	2.1		22	N2c	envA	EGFP.nls-SypEGFP	1.48565e+10
0.0001	70000	1		23	N2c	envA	SypRFP	7.03524e+09
0.001	80000	3.4		24	N2c	envA	EGFP	2.76732e+09
0.0001	80000	0.8		25	N2c	envA	tdTomato	6.42574e+09
0.0001	80000	1.3		26	N2c	envA	EGFP.nls-tdTomato	1.04682e+10
0.001	170000	0.7		27	N2c	envA	EYFP	1.19418e+09
0.001	80000	0.6		28	N2c	envA	mTurquoise	4.81446e+08
0.001	80000	0.6		29	N2c	envA	mCitrine	4.81446e+08
0.001	80000	0.7		30	N2c	envA	nl.EGFP-jRGECO1a	5.61969e+08
0.001	80000	0.6		31	N2c	envA	nl.mCherry-GCaMP7f	4.81446e+08
0.001	70000	3.4		35	N2c	envA	GCaMP8f	2.4214e+09
0.001	70000	2.7		36	N2c	envA	GCaMP8m	1.91598e+09
0.001	70000	1.7		37	N2c	envA	GCaMP8s	1.20023e+09
