# Supplementary material for: Fast, high-throughput production of improved rabies viral vectors for specific, efficient and versatile transsynaptic retrograde labeling
Source: eLife. 2022 Aug 30;11:e79848. doi: 10.7554/eLife.79848 (PMC9477495; doi:10.7554/eLife.79848)
Supplement: Figure 3—source data 1. — Two tables on top of page show the number of labeled cells per region for each individual slice and animal. Table on left shows data corresponding to Figure 3A–C and table on the right shows data corresponding to Figure 3D–F. Below each table are the calculated averages for each condition shown in Figure 3G and H. [file elife-79848-fig3-data1.xlsx]

## Sheet: Sheet1
Source data Figure 3G and H
Animal #	Section #	Region	N2c-EGFP (N2A)	N2c-tdTomato (BHK-eT)	Ratio		Animal #	Section #	Region	N2c-EGFP (BHK-eT)	B19-tdTomato (BHK-eT)	Ratio
1	1	MS	226	125	1.808		4	1	MS	58	50	0.862069
	2	MS	35	16	2.1875			2	MS	43	51	1.18605
	3	CA1	208	122	1.70492			3	CA1-R	157	178	1.13376
		CA3	344	235	1.46383				CA3-R	176	42	0.238636
		CA3-L	314	189	1.66138			4	CA3-R	71	7	0.0985915
	4	CA1	141	94	1.5				CA3-L	162	39	0.240741
		CA3	217	188	1.15426			5	CA3-L	115	20	0.173913
	5	CA1	179	102	1.7549			6	LEC	15	1	0.0666667
		CA3	310	211	1.46919			7	LEC	16	2	0.125
		CA3-L	385	254	1.51575
	6	CA1	153	99	1.54545		5	1	MS	49	51	1.04082
		CA3	125	90	1.38889			2	CA1-R	122	120	0.983607
		LEC	93	38	2.44737				CA3-R	84	16	0.190476
		CA3-L	141	109	1.29358				CA3-L	61	3	0.0491803
	7	CA1	87	62	1.40323			3	CA1-R	62	70	1.12903
		CA3	60	32	1.875				CA3-R	63	9	0.142857
		LEC	112	47	2.38298				CA3-L	75	4	0.0533333
	8	CA1	56	42	1.33333			4	LEC	14	2	0.142857
		CA3	172	152	1.13158			5	LEC	14	1	0.0714286
		CA3-L	165	111	1.48649
							6	1	MS	27	54	2
2	1	MS	118	76	1.55263			2	MS	25	25	1
	2	MS	75	51	1.47059			3	CA1-R	63	101	1.60317
	3	CA1	155	102	1.51961				CA3-R	77	17	0.220779
		CA3	340	197	1.72589				CA3-L	195	35	0.179487
		CA3-L	314	250	1.256			4	CA1-R	43	57	1.32558
	4	CA1	76	52	1.46154				CA3-R	64	4	0.0625
		CA3	174	115	1.51304				CA3-L	106	25	0.235849
		LEC	78	36	2.16667			5	LEC	20	1	0.05
		CA3-L	265	177	1.49718			6	LEC	16	3	0.1875
	5	EC	68	26	2.61538
	6	EC	88	50	1.76		7	1	MS	58	97	1.67241
	7	CA1	51	34	1.5			2	MS	41	51	1.2439
		CA3	271	221	1.22624			3	CA1-R	66	95	1.43939
		CA3-L	249	213	1.16901				CA3-R	103	31	0.300971
									CA3-L	241	27	0.112033
3	1	MS	275	112	2.45536			4	CA1-R	88	102	1.15909
	2	MS	255	97	2.62887				CA3-R	172	26	0.151163
	3	EC	96	36	2.66667				CA3-L	199	32	0.160804
	4	CA1	144	65	2.21538			5	LEC	19	2	0.105263																7.30118	3.30079
	5	EC	146	47	3.10638			6	LEC	20	1	0.05																6.04868	5.63704
	6	CA1	80	27	2.96296																							4.13364	1.69197
		CA3	181	110	1.64545																							51.0404	8.98883
		CA3-L	181	108	1.67593
Figure 3G
	N2c-N2c starter cell ratio (%)						B19-N2c starter cell ratio (%)
	Animal 1	Animal 2	Animal 3	Average	SEM		Animal 4	Animal 5	Animal 6	Animal 7	Average	SEM
CA1	156.772	149.372	258.917	188.354	35.3465		113.376	105.632	146.438	129.924	123.842	9.07704
Figure 3H
	N2c-N2c 2nd order cell ratio (%)						B19-N2c 2nd order cell ratio (%)
	Animal 1	Animal 2	Animal 3	Average	SEM		Animal 4	Animal 5	Animal 6	Animal 7	Average	SEM
CA3-R	84.2975	99.6436	63.5513	82.4975	10.4577		14.8721	15.7781	9.67234	17.3999	14.4306	1.67004
CA3-L	94.9975	87.5265	64.7282	82.4174	9.10375		18.2867	4.8524	14.1813	10.4999	11.9551	2.85206
EC	154.056	145.991	111.484	137.177	13.0556		5.88015	9.46683	8.10925	5.97514	7.35784	0.871201
MS	127.43	101.198	98.1823	108.937	9.28755		90.3242	98.5323	102.433	112.231	100.88	4.54791
