# Supplementary material for: Fast, high-throughput production of improved rabies viral vectors for specific, efficient and versatile transsynaptic retrograde labeling
Source: eLife. 2022 Aug 30;11:e79848. doi: 10.7554/eLife.79848 (PMC9477495; doi:10.7554/eLife.79848)
Supplement: Figure 4—source data 1. — Tables showing the cell count for tdTomato only and tdTomato +EGFP + cells per layer/section/animal along with the calculated normalized averages used to plot Figure 4C. Below, are two tables showing the average cell count per layer/slice in three individual animals, following immunolabeling for PV and Sst, used to plot Figure 4E. [file elife-79848-fig4-data1.xlsx]

## Sheet: Sheet1
Figure 3C
		Raw data
		tdTomato only								tdTomato + EGFP								Total
Animal #	Section #	CA3-P	CA1-P	Sub-P	S.O	S.R	S.LM	Sum		CA3-P	CA1-P	Sub-P	S.O	S.R	S.LM	Sum		CA3-P	CA1-P	Sub-P	S.O	S.R	S.LM		Sum total
1	1	3	0	10	2	0	3	18		0	0	1	5	0	7	13		3	0	11	7	0	10		31
	2	2	0	10	2	0	0	14		0	0	0	4	0	4	8		2	0	10	6	0	4		22
2	1	6	0	4	2	0	2	14		0	0	1	1	1	4	7		6	0	5	3	1	6		21
	2	4	0	4	5	0	1	14		0	0	0	5	1	1	7		4	0	4	10	1	2		21
	3	2	0	10	2	0	2	16		0	0	0	0	0	3	3		2	0	10	2	0	5		19
3	1	5	0	7	8	0	4	24		0	0	0	0	0	2	2		5	0	7	8	0	6		26
	2	1	0	10	3	0	4	18		0	0	1	2	0	3	6		1	0	11	5	0	7		24
	3	4	0	9	3	0	6	22		0	0	0	1	0	2	3		4	0	9	4	0	8		25
																									189
		Calculated fractions
Animal #	Section #	CA3-P	CA1-P	Sub-P	S.O	S.R	S.LM			CA3-P	CA1-P	Sub-P	S.O	S.R	S.LM			CA3-P	CA1-P	Sub-P	S.O	S.R	S.LM
1	1	9.67742	0	32.2581	6.45161	0	9.67742			0	0	3.22581	16.129	0	22.5806			9.67742	0	35.4839	22.5806	0	32.2581
	2	9.09091	0	45.4545	9.09091	0	0			0	0	0	18.1818	0	18.1818			9.09091	0	45.4545	27.2727	0	18.1818
2	1	28.5714	0	19.0476	9.52381	0	9.52381			0	0	4.7619	4.7619	4.7619	19.0476			28.5714	0	23.8095	14.2857	4.7619	28.5714
	2	19.0476	0	19.0476	23.8095	0	4.7619			0	0	0	23.8095	4.7619	4.7619			19.0476	0	19.0476	47.619	4.7619	9.52381
	3	10.5263	0	52.6316	10.5263	0	10.5263			0	0	0	0	0	15.7895			10.5263	0	52.6316	10.5263	0	26.3158
3	1	19.2308	0	26.9231	30.7692	0	15.3846			0	0	0	0	0	7.69231			19.2308	0	26.9231	30.7692	0	23.0769
	2	4.16667	0	41.6667	12.5	0	16.6667			0	0	4.16667	8.33333	0	12.5			4.16667	0	45.8333	20.8333	0	29.1667
	3	16	0	36	12	0	24			0	0	0	4	0	8			16	0	36	16	0	32
	Average tdTomato only	SEM tdTomato only	Average tdTomato + EGFP	SEM tdTomato + EGFP	Average total	SEM total
CA3-P	14.5389	2.73335	0	0	14.5389	2.73335
CA1-P	0	0	0	0	0	0
Sub-P	34.1286	4.31205	1.5193	0.755652	35.6479	4.18404
S.O	14.3339	2.97601	9.40195	3.15822	23.7359	4.15285
S.R	0	0	1.19048	0.77935	1.19048	0.77935
S.LM	11.3176	2.61724	13.5692	2.24281	24.8868	2.74878
Figure 3E
	S.O		S.LM						S.O		S.LM
Animal #	N2c-GFP	SST+	N2c-GFP	SST+				Animal #	N2c-GFP	PV+	N2c-GFP	PV+
1	12	8	16	0				1	13	0	15	0
2	7	4	10	0				2	6	0	4	0
3	9	10	9	0				3	8	0	10	0
