# Supplementary material for: Fast, high-throughput production of improved rabies viral vectors for specific, efficient and versatile transsynaptic retrograde labeling
Source: eLife. 2022 Aug 30;11:e79848. doi: 10.7554/eLife.79848 (PMC9477495; doi:10.7554/eLife.79848)
Supplement: Figure 6—source data 1. — The table details the firing properties of 6 cells to stimulation frequencies of 25, 50, and 100 Hz and 12 additional cells to stimulation of 25 Hz only. The average resting membrane potential for each cell is shown in the rightmost column. [file elife-79848-fig6-data1.xlsx]

## Sheet: Sheet1
Figure 6D
Animal #	Cell #	Frequecy (Hz)			RMP
		25	50	100
1	1	100	100	60	-60.8017
2	2	100	100	96	-55.472
	3	100	100	90	-56.8791
	4	100	80	20	-59.8887
	5	98	100	60	-60.3205
	6	100	100	60	-77.8245
3	7	100			-63.7108
4	8	100			-61.955
	9	100			-71.0551
	10	100			-70.8388
	11	100			-59.4563
	12	100			-55.1527
5	13	100			-56.7717
	14	100			-58.4833
	15	100			-56.2627
6	16	100			-58.9898
	17	100			-57.7277
	18	100			-57.6666
