# Supplementary material for: Fast, high-throughput production of improved rabies viral vectors for specific, efficient and versatile transsynaptic retrograde labeling
Source: eLife. 2022 Aug 30;11:e79848. doi: 10.7554/eLife.79848 (PMC9477495; doi:10.7554/eLife.79848)
Supplement: Figure 7—source data 1. — The data file is divided into 5 separate tabs, each labeled according to the plot it was used to generate. All data is presented in tables, with the individual animal, recording day and identity (tdTomato+ or tdTomato-) indicated for each data line. [file elife-79848-fig7-data1.xlsx]

## Sheet: Fig6C
Day	Date	Cell count per animal
		CT-1	CT-2	CT-3
3	2021-04-23	183	-	-
5	2021-04-25	282	252	375
7	2021-04-27	669	788	-
9	2021-04-29	949	857	-
14	2021-05-04	794	1189	830
16	2021-05-06	1189	1212	970

## Sheet: Fig6D
polar plots
	Neuron	1	2	3	4	5	6	7	8
	Day	9	9	9	9	16	16	16	16
	tdTomato	negative	negative	negative	positive	negative	negative	negative	positive
	grating direction (deg)	normalized activity (a.u.)				normalized activity (a.u.)
	0	0.0949199	0.2489	0.121021	0.115582	0.0692086	0.113084	0.102605	0.0991603
	45	0.0745888	0.10016	0.0937355	0.0871141	0.0520039	0.146866	0.113599	0.109333
	90	0.0802059	0.0326422	0.0635943	0.079601	0.0585967	0.114292	0.110051	0.0967553
	135	0.0844379	0.139427	0.0843814	0.188516	0.0737137	0.0976278	0.126321	0.19416
	180	0.0720592	0.0745227	0.122698	0.262138	0.0940808	0.174009	0.0970021	0.128479
	225	0.189007	0.0948635	0.174985	0.0984911	0.545504	0.206987	0.127253	0.135371
	270	0.316175	0.0436059	0.242325	0.0767467	0.0529543	0.0783598	0.163354	0.0946394
	315	0.0886068	0.26588	0.0972609	0.0918111	0.0539381	0.0687747	0.159815	0.142103
single trial data
	time(s)=>	0	0.0166618	0.0333237	0.0499855	0.0666473	0.0833093	0.0999712	0.116633	0.133295	0.149957	0.166619	0.183281	0.199943	0.216605	0.233267	0.249929	0.26659	0.283252	0.299914	0.316576	0.333238	0.3499	0.366562	0.383224	0.399886	0.416548	0.43321	0.449872	0.466534	0.483196	0.499857	0.516519	0.533181	0.549843	0.566505	0.583167	0.599829	0.61649	0.633152	0.649814	0.666476	0.683138	0.6998	0.716462	0.733124	0.749786	0.766448	0.78311
neuron	grating direction (deg)
1	0	0	0	0	0	0	0	0	0	0	0	0	0	0	0	0	0	0	0	0	0	0	0	0	0	0	0	0	0	0	0	0	0	0	0	0	0	0	0	0	0	0	0	0	0	0	0	0	0
1	0	0	0	0	0	0	0	0	0	0	0	0	0	0	0	0	0	0	0	0	0	0	0	0	0	0	0	0	0	0	0	0	0	0	0	0	0	0	0	0	0.000360569	0.00505425	0.00974793	0.0144416	0.0191353	0.023829	0.0285227	0.0332164	0.0379101
1	0	0.0454174	0.0394155	0.0334136	0.0274117	0.0214098	0.0154079	0.00940605	0.00340416	0.0263068	0.0870868	0.147866	0.208646	0.269425	0.330205	0.390985	0.451765	0.512545	0.573325	0.634105	0.694885	0.755665	0.816445	0.822818	0.762038	0.701259	0.640479	0.579699	0.51892	0.45814	0.39736	0.33658	0.2758	0.21502	0.15424	0.0934599	0.0326798	0	0	0	0	0	0	0	0	0	0	0	0
1	0	0.0177602	0.0135122	0.00926426	0.00501627	0.000768286	0	0	0	0	0	0	0	0	0	0	0	0	0	0	0	0	0	0	0	0	0	0	0	0	0	0	0	0	0	0	0	0	0	0	0	0	0	0	0	0	0	0	0
1	0	1.11336	1.17923	1.09423	1.00923	0.924224	0.83922	0.754216	0.669212	0.584209	0.499204	0.4142	0.329196	0.244192	0.159188	0.0741841	0	0	0	0	0	0	0	0	0	0	0	0	0	0	0	0	0	0	0	0	0	0	0	0	0	0	0	0	0	0	0	0	0
1	0	0	0	0	0	0	0	0	0	0	0	0	0	0	0	0	0	0	0	0	0	0	0	0	0	0	0	0.0134405	0.0926716	0.171903	0.251134	0.330365	0.409595	0.488826	0.568057	0.647289	0.72652	0.805751	0.884983	0.964214	1.04344	1.09345	1.01422	0.93499	0.855759	0.776529	0.697298	0.618067	0.538836
1	45	0.31272	0.352404	0.392089	0.431773	0.471457	0.511142	0.550826	0.519484	0.4798	0.440115	0.40043	0.360746	0.321061	0.281376	0.241692	0.202007	0.162323	0.122639	0.0829542	0.0432698	0.00358542	0.00537769	0.0112895	0.0172013	0.0231132	0.029025	0.0349369	0.0408487	0.0467606	0.0526724	0.0585843	0.0644961	0.0704079	0.0763198	0.0822316	0.0772135	0.0713017	0.0653898	0.059478	0.0535662	0.0476543	0.0417425	0.0358306	0.0299188	0.0240069	0.0180951	0.0121833	0.00627141
1	45	0.400581	0.392512	0.384443	0.376373	0.351101	0.324238	0.297374	0.270511	0.243648	0.216785	0.189921	0.163058	0.136195	0.109332	0.0824685	0.0556052	0.0287418	0.00187845	0	0	0	0	0	0	0	0	0	0	0	0	0	0	0	0	0	0	0	0	0	0	0	0	0	0	0	0	0	0
1	45	0.640271	0.642414	0.594855	0.547296	0.499738	0.452179	0.40462	0.357061	0.309502	0.261943	0.214384	0.166825	0.119266	0.0717073	0.0241485	0.00659916	0.0200056	0.033412	0.0468185	0.0602249	0.0736314	0.087038	0.100445	0.113851	0.127258	0.140664	0.154071	0.167477	0.180884	0.19786	0.218307	0.238753	0.2592	0.279647	0.300094	0.320541	0.340988	0.361435	0.381882	0.402329	0.422776	0.443223	0.46367	0.455784	0.421931	0.388077	0.354224	0.320371
1	45	2.02359	2.05716	2.09074	2.12431	2.15788	2.19145	2.22503	2.2586	2.29217	2.32574	2.35932	2.39289	2.33972	2.20631	2.07289	1.93948	1.80606	1.67264	1.53923	1.40581	1.27239	1.13898	1.00556	0.872146	0.73873	0.605315	0.532372	0.512154	0.491937	0.471719	0.451501	0.431283	0.411066	0.390848	0.37063	0.350412	0.330195	0.309977	0.289759	0.269541	0.281443	0.319731	0.358019	0.396307	0.434595	0.472883	0.511171	0.549459
1	90	0	0	0	0	0	0	0	0	0	0	0	0	0	0	0	0	0	0	0	0	0	0	0	0	0	0	0	0	0.0645436	0.194807	0.325071	0.455335	0.585598	0.715862	0.846126	0.97639	1.10665	1.23692	1.36718	1.49745	1.62771	1.75797	1.75529	1.62502	1.49476	1.3645	1.23423	1.10397
1	90	0.46263	0.561881	0.661132	0.760384	0.859635	0.958886	1.05814	1.15739	1.25664	1.35589	1.45515	1.39489	1.28927	1.18365	1.07803	0.972408	0.866789	0.761169	0.65555	0.54993	0.444311	0.338691	0.23307	0.12745	0.0218294	0.0696449	0.157434	0.245223	0.333012	0.420801	0.50859	0.596378	0.684166	0.771955	0.859743	0.947531	1.03532	1.12311	1.2109	1.17164	1.1022	1.03277	0.963336	0.893901	0.824467	0.755033	0.685599	0.616165
1	90	0.195685	0.182437	0.16919	0.155942	0.142695	0.129448	0.1162	0.102953	0.0897052	0.0764576	0.0632101	0.0757103	0.104435	0.13316	0.161886	0.190611	0.219336	0.248061	0.276786	0.30551	0.334235	0.36296	0.391685	0.42041	0.449135	0.43916	0.406282	0.373403	0.340524	0.307645	0.274767	0.241888	0.209009	0.176131	0.143252	0.110374	0.0774955	0.044617	0.0117383	0.0483559	0.123562	0.198768	0.273973	0.349179	0.424385	0.499591	0.574796	0.650002
1	135	0.584384	0.599088	0.613791	0.628494	0.643197	0.657901	0.672604	0.687307	0.70201	0.716713	0.731417	0.74612	0.760823	0.775526	0.781885	0.725504	0.669123	0.612742	0.55636	0.499979	0.443597	0.387216	0.330835	0.274453	0.218072	0.16169	0.105309	0.0489279	0	0	0	0	0	0	0	0	0	0	0	0	0	0	0.00432787	0.0337689	0.0632099	0.0926509	0.122092	0.151533
1	135	0.722948	0.643722	0.564495	0.485268	0.406041	0.326814	0.247587	0.16836	0.0891334	0.00990679	0	0	0	0	0	0	0	0	0	0	0	0	0	0	0	0	0	0	0	0	0	0	0	0	0	0	0	0	0	0	0	0	0	0	0	0	0	0
1	135	0	0	0	0	0	0	0	0.0167453	0.048377	0.0800087	0.11164	0.143272	0.174904	0.206536	0.238167	0.269799	0.301431	0.333062	0.364694	0.396325	0.427957	0.455363	0.47923	0.503097	0.526964	0.550831	0.574699	0.598566	0.622433	0.6463	0.670167	0.694034	0.717901	0.741768	0.765635	0.745144	0.689646	0.634147	0.578649	0.52315	0.467651	0.412152	0.356654	0.301155	0.245656	0.190157	0.134658	0.0791592
1	135	0.221783	0.243591	0.265399	0.287208	0.300968	0.27916	0.257352	0.235543	0.213735	0.191927	0.170119	0.148311	0.126503	0.104695	0.0828866	0.0610786	0.0392706	0.0174625	0	0	0	0	0	0	0	0	0	0	0	0	0	0	0	0	0	0	0	0	0	0	0	0	0	0	0	0	0	0
1	135	0.659912	0.612015	0.564118	0.516221	0.468324	0.420427	0.37253	0.324633	0.276736	0.22884	0.180943	0.133046	0.0851494	0.0372525	0	0	0	0	0	0	0	0	0	0	0	0	0	0	0	0	0	0	0	0	0	0	0	0	0	0	0	0	0	0	0	0	0	0
1	135	0.776035	0.744468	0.712901	0.681333	0.649766	0.618199	0.586632	0.555064	0.523497	0.49193	0.473482	0.480173	0.486864	0.493554	0.500245	0.506936	0.513627	0.520318	0.527009	0.5337	0.540391	0.547082	0.553773	0.560464	0.550318	0.509935	0.469552	0.42917	0.388787	0.348404	0.308021	0.267639	0.227256	0.186874	0.146491	0.106108	0.0657252	0.0253423	0.0109512	0.0403544	0.0697575	0.0991606	0.128564	0.157967	0.18737	0.216773	0.246176	0.275579
1	180	0.067561	0.111467	0.169155	0.226843	0.28453	0.342218	0.399906	0.457593	0.515281	0.572969	0.630656	0.688344	0.746031	0.803718	0.861405	0.899315	0.93076	0.962204	0.993648	1.02509	1.05654	1.08798	1.11942	1.15087	1.18231	1.21376	1.2452	1.27665	1.30809	1.28479	1.24499	1.2052	1.1654	1.1256	1.0858	1.04601	1.00621	0.966412	0.926615	0.886817	0.84702	0.807222	0.767425	0.785695	0.820038	0.854382	0.888725	0.923069
1	180	0.127228	0.164668	0.202108	0.239548	0.276987	0.314427	0.351866	0.389306	0.426746	0.464185	0.501625	0.508142	0.470702	0.433263	0.395823	0.358383	0.320943	0.283504	0.246064	0.208624	0.171185	0.133745	0.0963057	0.0588661	0.0214265	0	0	0	0	0	0	0	0	0	0	0	0	0	0	0.0102293	0.0333485	0.0564677	0.0795869	0.102706	0.125825	0.148945	0.172064	0.195183
1	180	0.726151	0.625319	0.524488	0.423656	0.322825	0.221993	0.121162	0.0203318	0.0391431	0.0881728	0.137202	0.186232	0.235262	0.284292	0.333322	0.382352	0.431382	0.480412	0.529442	0.578472	0.627502	0.676532	0.681254	0.675794	0.670333	0.664872	0.659412	0.653951	0.64849	0.64303	0.637569	0.632108	0.626647	0.621187	0.615726	0.610265	0.573256	0.529687	0.486118	0.442549	0.39898	0.35541	0.311841	0.268272	0.224703	0.181134	0.137565	0.0939953
1	180	0.0961374	0.106322	0.116507	0.126693	0.136878	0.137819	0.127634	0.117449	0.107264	0.0970786	0.0868935	0.0767084	0.0665233	0.0563382	0.0461531	0.035968	0.025783	0.0155979	0.00541286	0	0	0	0	0	0	0	0	0	0	0	0	0	0	0	0	0	0	0	0	0	0	0	0	0	0	0	0	0.00195641
1	180	3.69153	3.4086	3.12567	2.84274	2.55981	2.27689	1.99396	1.71104	1.42811	1.14518	0.862252	0.579323	0.296394	0.0134655	0	0	0	0	0	0	0	0	0	0	0	0	0	0	0	0	0	0	0	0	0	0	0	0	0	0	0	0	0.0363184	0.0733051	0.110292	0.147279	0.184265	0.221252
1	225	1.07484	0.993142	0.911446	0.829751	0.748055	0.666359	0.584664	0.502968	0.421272	0.339577	0.257882	0.176187	0.094492	0.0127969	0.00285753	0.00624581	0.00963408	0.0130224	0.0164106	0.0197989	0.0231872	0.0265754	0.0299637	0.033352	0.0367402	0.0401285	0.0435167	0.046905	0.0444777	0.0410894	0.0377011	0.0343129	0.0309246	0.0275363	0.024148	0.0207598	0.0173715	0.0139832	0.0105949	0.0072067	0.00381846	0.000430214	0	0	0	0	0	0
1	225	0.578102	0.512107	0.446112	0.380118	0.314123	0.248128	0.182133	0.116138	0.0501429	0.010132	0.0523134	0.0944948	0.136676	0.178858	0.221039	0.263221	0.305402	0.347584	0.389766	0.431948	0.474129	0.516311	0.558493	0.579165	0.536983	0.494802	0.452621	0.410439	0.368258	0.326076	0.283895	0.241713	0.199531	0.15735	0.115168	0.0729861	0.0308044	0.00170602	0.0080311	0.0143562	0.0206812	0.0270062	0.0333313	0.0396563	0.0459813	0.0523064	0.0586315	0.0649565
1	225	0.110113	0.125516	0.140918	0.156321	0.171723	0.187125	0.202528	0.212882	0.197479	0.182077	0.166675	0.151272	0.13587	0.120468	0.105065	0.0896628	0.0742604	0.058858	0.0434556	0.0280532	0.0126508	0	0	0	0	0	0	0	0	0	0	0	0	0	0	0.00545052	0.0336329	0.061815	0.0899972	0.118179	0.146361	0.174544	0.202726	0.230908	0.259091	0.287273	0.315455	0.343638
1	225	0.355201	0.252247	0.149293	0.0463391	0.00817123	0.0230306	0.0378899	0.0527492	0.0676085	0.0824678	0.0973271	0.112186	0.127046	0.141905	0.156764	0.171623	0.186483	0.201342	0.19942	0.184561	0.169702	0.154842	0.139983	0.125124	0.110264	0.0954051	0.0805458	0.0656865	0.0508273	0.035968	0.0211088	0.00624958	0.0460087	0.125415	0.204821	0.284228	0.363634	0.44304	0.522446	0.601852	0.681258	0.760664	0.84007	0.919476	0.998882	1.07829	1.06333	0.983925
1	225	0.166405	0.294136	0.421866	0.549597	0.677327	0.805058	0.932788	1.06052	1.18825	1.31598	1.44371	1.57144	1.69917	1.76171	1.68413	1.60655	1.52896	1.45138	1.3738	1.29622	1.21864	1.14106	1.06348	0.985895	0.908313	0.830732	0.75315	0.707152	0.724616	0.742081	0.759545	0.77701	0.794474	0.811939	0.829403	0.846868	0.864332	0.881797	0.899261	0.916726	0.93419	0.931946	0.892621	0.853296	0.813972	0.774647	0.735323	0.695998
1	225	0	0	0	0	0	0	0	0	0	0	0	0	0	0	0	0	0	0	0	0	0	0	0	0	0	0.0546425	0.109674	0.164705	0.219737	0.274768	0.329799	0.38483	0.439861	0.494892	0.549923	0.604955	0.659986	0.715017	0.769387	0.738519	0.707652	0.676784	0.645917	0.615049	0.584182	0.553314	0.522447	0.491579
1	270	0	0	0	0	0	0	0	0	0	0	0	0	0	0.00250852	0.0147241	0.0269398	0.0391554	0.051371	0.0635866	0.0758023	0.0880179	0.100233	0.112449	0.124665	0.13688	0.149096	0.161311	0.169126	0.161358	0.15359	0.145821	0.138053	0.130284	0.122516	0.114747	0.106979	0.0992104	0.091442	0.0836735	0.0759051	0.0681367	0.0611489	0.0567018	0.0522546	0.0478075	0.0433603	0.0389131	0.034466
1	270	0.151847	0.18862	0.225392	0.262165	0.298938	0.33571	0.372483	0.409255	0.446028	0.482801	0.508974	0.472202	0.435429	0.398657	0.361884	0.325111	0.288339	0.251566	0.214794	0.178021	0.141249	0.104476	0.0677034	0.0309307	0	0	0	0	0	0	0	0	0	0	0	0	0	0	0.00344043	0.0232561	0.0430717	0.0628873	0.0827029	0.102518	0.122334	0.14215	0.161965	0.181781
1	270	0	0	0	0	0	0	0.0212876	0.10304	0.184792	0.266545	0.348297	0.430049	0.511801	0.593553	0.675305	0.757057	0.838809	0.92056	1.00231	1.08406	1.1427	1.14043	1.13816	1.1359	1.13363	1.13136	1.1291	1.12683	1.12456	1.1223	1.12003	1.11776	1.1155	1.11323	1.08858	1.00909	0.929608	0.850123	0.770637	0.691152	0.611666	0.53218	0.452695	0.373209	0.293723	0.214238	0.134754	0.0552686
1	270	1.00296	1.1135	1.22403	1.33457	1.44511	1.53608	1.42555	1.31501	1.20448	1.09394	0.983409	0.872873	0.762338	0.651802	0.541266	0.430731	0.320195	0.20966	0.0991243	0	0	0	0	0	0	0	0	0	0	0	0	0	0	0	0	0	0	0	0	0	0	0	0	0	0	0	0	0.00399754
1	270	0	0	0	0	0	0	0	0	0	0	0	0	0	0	0	0	0	0	0	0	0	0	0	0	0	0	0	0	0	0	0	0	0	0	0	0	0	0	0	0	0	0	0	0	0	0	0	0
1	270	0	0	0	0	0	0	0	0	0	0	0	0	0	0	0	0	0	0	0	0	0	0	0	0	0	0	0.0284117	0.0600212	0.0916307	0.12324	0.15485	0.186459	0.218069	0.249678	0.281288	0.312897	0.344507	0.376116	0.407725	0.439335	0.489637	0.541707	0.593777	0.645847	0.697917	0.749987	0.802057	0.854127
1	315	0	0	0	0	0	0	0	0	0	0	0	0	0	0	0	0	0	0	0	0	0	0	0	0	0	0	0	0	0	0	0	0	0	0	0	0	0	0	0	0	0	0	0	0	0	0	0	0
1	315	0.27433	0.245424	0.216518	0.187612	0.158706	0.1298	0.100894	0.0719879	0.0430818	0.0141757	0	0	0	0	0	0	0	0	0	0	0	0	0	0	0	0	0	0	0	0	0	0	0	0	0	0	0	0	0	0	0	0	0	0	0	0	0	0
1	315	0.603252	0.702922	0.802592	0.902261	1.00193	1.1016	1.20127	1.30094	1.3885	1.30815	1.2278	1.14745	1.06711	0.986757	0.906409	0.826061	0.745712	0.665364	0.585016	0.504667	0.424318	0.34397	0.268628	0.249306	0.229985	0.210664	0.191343	0.172021	0.1527	0.133379	0.114058	0.0947364	0.0754151	0.0560939	0.0367725	0.0174512	0.00575188	0.0651775	0.124603	0.184029	0.243454	0.302879	0.362305	0.42173	0.481155	0.540581	0.600006	0.659432
1	315	0.0736115	0.0465408	0.01947	0.0138416	0.0631397	0.112438	0.161735	0.211033	0.260331	0.309629	0.358927	0.408224	0.457522	0.50682	0.556118	0.605416	0.654714	0.679224	0.644644	0.610064	0.575484	0.540904	0.506324	0.471744	0.437164	0.402584	0.368004	0.333424	0.298844	0.264264	0.229684	0.201266	0.186549	0.171831	0.157113	0.142395	0.127677	0.112959	0.0982412	0.0835233	0.0688055	0.0540877	0.0393699	0.024652	0.00993422	0	0	0
1	315	0.882862	0.839132	0.775285	0.711437	0.64759	0.583742	0.519894	0.456047	0.392199	0.328352	0.264504	0.200657	0.13681	0.072963	0.00911601	0.00684897	0.0148388	0.0228286	0.0308184	0.0388082	0.046798	0.0547878	0.0627776	0.0707675	0.0787573	0.0867471	0.0947368	0.102727	0.110716	0.104772	0.0967823	0.0887924	0.0808026	0.0728128	0.064823	0.0568332	0.0488434	0.0408536	0.0328638	0.024874	0.0168842	0.00889442	0.000904684	0.0109669	0.0233342	0.0357015	0.0480688	0.0604362
1	315	0	0	0	0	0	0	0	0	0	0	0	0	0	0	0	0	0	0	0	0	0	0	0	0	0	0	0	0	0	0	0	0	0	0	0	0	0	0	0	0.00105092	0.00482725	0.00860358	0.0123799	0.0161563	0.0199326	0.023709	0.0274853	0.0312617
	time(s)=>	0	0.0166618	0.0333237	0.0499855	0.0666473	0.0833093	0.0999712	0.116633	0.133295	0.149957	0.166619	0.183281	0.199943	0.216605	0.233267	0.249929	0.26659	0.283252	0.299914	0.316576	0.333238	0.3499	0.366562	0.383224	0.399886	0.416548	0.43321	0.449872	0.466534	0.483196	0.499857	0.516519	0.533181	0.549843	0.566505	0.583167	0.599829	0.61649	0.633152	0.649814	0.666476	0.683138	0.6998	0.716462	0.733124	0.749786	0.766448	0.78311
neuron	grating direction (deg)
2	0	0	0	0	0	0	0	0	0	0	0	0	0	0	0	0	0	0	0	0	0	0	0	0	0	0	0	0	0	0	0	0	0	0	0	0	0	0	0	0	0	0	0	0	0	0	0	0	0
2	0	0	0	0	0	0	0	0	0	0	0	0	0	0	0	0	0	0	0	0	0	0	0	0	0	0	0	0	0	0	0	0	0	0	0	0	0	0	0	0	0.00633003	0.0887308	0.171132	0.253532	0.335933	0.418334	0.500735	0.583136	0.665537
2	0	0.328258	0.318995	0.309732	0.30047	0.291207	0.281944	0.272681	0.263419	0.285243	0.347804	0.410364	0.472925	0.535486	0.598046	0.660607	0.723168	0.785729	0.84829	0.910851	0.973413	1.03597	1.09853	1.09683	1.01581	0.934791	0.85377	0.77275	0.69173	0.610709	0.529689	0.448668	0.367647	0.286626	0.205605	0.124584	0.0435628	0	0	0	0	0	0	0	0	0	0	0	0
2	0	0.882362	0.829643	0.776923	0.724204	0.671485	0.662648	0.6635	0.664352	0.665204	0.666056	0.666908	0.66776	0.668612	0.669464	0.670316	0.671168	0.67202	0.672872	0.673724	0.688109	0.70519	0.72227	0.739351	0.756432	0.773512	0.790593	0.807674	0.824754	0.841835	0.858915	0.875996	0.893076	0.910157	0.89782	0.880237	0.862654	0.84507	0.827487	0.809904	0.792321	0.774738	0.757155	0.739572	0.721989	0.704405	0.686822	0.669239	0.625772
2	0	0	0	0	0	0	0	0	0	0	0	0	0	0	0	0	0	0	0	0	0	0	0	0	0	0	0	0	0	0	0	0	0	0	0	0	0	0	0	0	0	0	0	0	0	0	0	0	0
2	0	0.740186	0.677697	0.615209	0.55272	0.490232	0.427743	0.365254	0.302766	0.240277	0.177788	0.1153	0.0528117	0.000505247	0.00376795	0.00703066	0.0102934	0.0135561	0.0168188	0.0200815	0.0233442	0.0266069	0.0298696	0.0331324	0.0363951	0.0396578	0.0429205	0.0499594	0.0754825	0.101006	0.126529	0.152052	0.177575	0.203098	0.228621	0.254144	0.279667	0.30519	0.330714	0.356237	0.38176	0.3999	0.385389	0.370878	0.356367	0.341856	0.327345	0.312834	0.298323
2	45	0.423748	0.475589	0.52743	0.579271	0.631112	0.682953	0.734794	0.692876	0.639946	0.587015	0.534085	0.481154	0.428224	0.375293	0.322363	0.269433	0.216503	0.163573	0.110642	0.0577123	0.00478215	0.0132806	0.0278803	0.04248	0.0570797	0.0716795	0.0862793	0.100879	0.115479	0.130079	0.144678	0.159278	0.173878	0.188478	0.203077	0.256313	0.312708	0.369103	0.425498	0.481893	0.538288	0.594683	0.651079	0.707474	0.763869	0.820264	0.87666	0.933055
2	45	1.88452	1.92632	1.96812	2.00992	1.93672	1.85289	1.76905	1.68521	1.60137	1.51753	1.4337	1.34986	1.26602	1.18218	1.09835	1.01451	0.930669	0.846831	0.906639	0.977247	1.04785	1.11846	1.18907	1.25968	1.33029	1.40089	1.4715	1.54211	1.61271	1.68332	1.75393	1.82454	1.78822	1.74566	1.7031	1.66055	1.61799	1.57543	1.53287	1.49031	1.44775	1.40519	1.36264	1.32008	1.27752	1.23496	1.31886	1.40809
2	45	0.756472	0.760387	0.707092	0.653797	0.600502	0.547207	0.493912	0.440617	0.387322	0.334027	0.280732	0.227437	0.174142	0.120847	0.0675521	0.053213	0.0790581	0.104903	0.130748	0.156593	0.182439	0.208284	0.234129	0.259975	0.28582	0.311665	0.33751	0.363355	0.389201	0.401959	0.401993	0.402026	0.40206	0.402093	0.402126	0.40216	0.402193	0.402227	0.40226	0.402294	0.402327	0.402361	0.402394	0.387397	0.358623	0.329849	0.301075	0.272301
2	45	0	0	0	0	0	0	0	0	0	0	0	0	0	0	0	0	0	0	0	0	0	0	0	0	0	0	0	0	0	0	0	0	0	0	0	0	0	0	0	0	0	0	0	0	0	0	0	0
2	90	1.10454	1.21546	1.32638	1.43729	1.54821	1.65912	1.77004	1.88095	1.99187	2.10278	2.2137	2.32461	2.43553	2.54644	2.57558	2.51636	2.45714	2.39792	2.3387	2.27948	2.22026	2.16104	2.10182	2.0426	1.98338	1.92417	1.86495	1.80573	1.71293	1.58595	1.45897	1.33199	1.20501	1.07803	0.951047	0.824066	0.697085	0.570104	0.443123	0.316143	0.189162	0.062182	0.0234316	0.0693486	0.115266	0.161183	0.2071	0.253017
2	90	0	0	0	0	0	0	0	0	0	0	0	0	0	0	0	0	0	0	0	0	0	0	0	0	0	0	0	0	0	0	0	0	0	0	0	0	0	0	0	0.0240565	0.0538266	0.0835969	0.113367	0.143137	0.172908	0.202678	0.232448	0.262218
2	90	0	0	0	0	0	0	0	0	0	0	0	0.0355781	0.0935757	0.151573	0.209571	0.267568	0.325566	0.383563	0.44156	0.499557	0.557554	0.615551	0.673549	0.731546	0.789544	0.802719	0.789366	0.776014	0.762662	0.74931	0.735958	0.722606	0.709253	0.695901	0.682549	0.669197	0.655845	0.642493	0.629141	0.624894	0.625703	0.626511	0.62732	0.628129	0.628937	0.629746	0.630555	0.631363
2	135	0.00245713	0.0264107	0.0503645	0.0743183	0.0982721	0.122226	0.14618	0.170133	0.194087	0.218041	0.241995	0.265948	0.289902	0.313855	0.332185	0.308232	0.284278	0.260324	0.236371	0.212417	0.188463	0.164509	0.140556	0.116602	0.0926482	0.0686944	0.0447407	0.0207871	0.00633914	0.0542932	0.102247	0.150201	0.198156	0.24611	0.294065	0.342019	0.389974	0.437928	0.485883	0.533837	0.581792	0.629746	0.663601	0.615647	0.567693	0.519739	0.471785	0.423831
2	135	0.551019	0.56691	0.582802	0.598693	0.614585	0.630476	0.646367	0.662259	0.67815	0.694042	0.724375	0.756773	0.789171	0.821568	0.853966	0.886363	0.918761	0.951159	0.983556	1.01595	1.04835	1.08075	1.11315	1.14554	1.12174	1.09096	1.06018	1.0294	0.998628	0.967851	0.937075	0.906298	0.875521	0.844745	0.813968	0.783191	0.752414	0.721637	0.747402	0.779138	0.810874	0.842611	0.874347	0.906083	0.93782	0.969556	1.00129	1.03303
2	135	0.37171	0.385937	0.400163	0.41439	0.428616	0.442843	0.45707	0.459069	0.450198	0.441327	0.432456	0.423585	0.414714	0.405842	0.396971	0.3881	0.379229	0.370358	0.361487	0.352616	0.343745	0.352831	0.37696	0.401089	0.425217	0.449346	0.473475	0.497603	0.521732	0.545861	0.56999	0.594119	0.618247	0.642376	0.666505	0.667775	0.651006	0.634237	0.617468	0.600699	0.58393	0.567161	0.550392	0.533623	0.516854	0.500085	0.483316	0.466547
2	135	0	0	0	0	0.00131958	0.00847132	0.0156231	0.0227748	0.0299266	0.0370783	0.0442301	0.0513818	0.0585335	0.0656852	0.0728369	0.0799886	0.0871403	0.094292	0.0985935	0.0914418	0.0842901	0.0771383	0.0699866	0.0628348	0.0556831	0.0485313	0.0413796	0.0342279	0.0270762	0.0199245	0.0127728	0.00562108	0	0	0	0	0	0	0	0	0	0	0	0	0	0	0.0216315	0.116178
2	135	0	0	0	0	0	0	0	0	0	0	0	0	0	0	0	0	0	0	0	0	0	0	0	0	0	0	0	0	0.0121092	0.0632025	0.114296	0.165389	0.216483	0.267577	0.31867	0.369764	0.420857	0.471951	0.523044	0.574138	0.625231	0.676324	0.701689	0.650596	0.599503	0.54841	0.497316	0.446223
2	135	0	0	0	0	0	0	0	0	0	0	0.00691511	0.0270811	0.047247	0.0674129	0.0875789	0.107745	0.127911	0.148077	0.168243	0.188409	0.208575	0.228741	0.248907	0.269073	0.302162	0.35846	0.414758	0.471055	0.527353	0.583651	0.639949	0.696246	0.752544	0.808841	0.865139	0.921437	0.977735	1.03403	1.04088	0.964419	0.887956	0.811492	0.735028	0.658565	0.582101	0.505637	0.429174	0.352711
2	180	0.75506	0.827422	0.923516	1.01961	1.1157	1.2118	1.30789	1.40398	1.50008	1.59617	1.69226	1.78836	1.88445	1.98054	2.07663	2.1741	2.27202	2.36994	2.46786	2.56577	2.66369	2.76161	2.85953	2.95744	3.05536	3.15328	3.2512	3.34912	3.44703	3.51728	3.57918	3.64108	3.70298	3.76488	3.82678	3.88869	3.95059	4.01249	4.07439	4.13629	4.1982	4.2601	4.322	4.23312	4.1025	3.97189	3.84127	3.71065
2	180	0.422337	0.422094	0.421851	0.421608	0.421366	0.421123	0.42088	0.420637	0.420395	0.420152	0.419909	0.434672	0.470767	0.506861	0.542955	0.57905	0.615144	0.651238	0.687332	0.723426	0.75952	0.795614	0.831709	0.867803	0.903897	0.919402	0.907359	0.895316	0.883273	0.87123	0.859187	0.847144	0.835101	0.823057	0.811014	0.798971	0.786928	0.774885	0.762842	0.743837	0.716058	0.68828	0.660501	0.632722	0.604944	0.577165	0.549387	0.521608
2	180	0.611854	0.63302	0.654186	0.675352	0.696519	0.717685	0.738851	0.760017	0.780972	0.801874	0.822775	0.843677	0.864579	0.885481	0.906383	0.927285	0.948187	0.969089	0.98999	1.01089	1.03179	1.0527	1.06267	1.07014	1.07761	1.08508	1.09255	1.10002	1.10748	1.11495	1.12242	1.12989	1.13736	1.14483	1.15229	1.15976	1.12192	1.07465	1.02739	0.980125	0.932861	0.885596	0.838332	0.791067	0.743802	0.696538	0.649273	0.602008
2	180	0.182361	0.201681	0.221	0.24032	0.25964	0.261426	0.242106	0.222786	0.203466	0.184146	0.164826	0.145506	0.126187	0.106867	0.0875467	0.0682269	0.0489071	0.0295873	0.0102675	0	0	0	0	0	0	0	0	0	0	0	0	0	0	0	0	0	0	0	0	0	0	0	0	0	0	0	0	0
2	180	0	0	0	0	0	0	0	0	0	0	0	0	0	0	0	0	0	0	0	0	0	0	0	0	0	0	0	0	0	0	0	0	0	0	0	0	0	0	0	0	0	0	0.110109	0.222245	0.33438	0.446516	0.558651	0.670787
2	225	0	0	0	0	0	0	0	0	0	0	0	0	0	0	0	0	0	0	0	0	0	0	0	0	0	0	0	0	0	0	0	0	0	0	0	0	0	0	0	0	0	0	0.0199429	0.0427862	0.0656298	0.0884733	0.111317	0.13416
2	225	0.288518	0.255581	0.222645	0.189708	0.156771	0.123835	0.0908983	0.0579617	0.0250252	0.00462471	0.0238781	0.0431316	0.062385	0.0816384	0.100892	0.120145	0.139399	0.158653	0.177906	0.19716	0.216413	0.235667	0.254921	0.274072	0.292923	0.311775	0.330626	0.349477	0.368329	0.38718	0.406032	0.424883	0.443735	0.462586	0.481438	0.500289	0.519141	0.52263	0.484525	0.44642	0.408315	0.37021	0.332105	0.294	0.255895	0.21779	0.179685	0.14158
2	225	0.97897	0.835764	0.692559	0.549353	0.406147	0.262942	0.119736	0.030311	0.215263	0.400215	0.585168	0.77012	0.955073	1.14003	1.32498	1.50993	1.69489	1.87984	2.06479	2.24975	2.4347	2.58417	2.57049	2.55681	2.54313	2.52946	2.51578	2.5021	2.48842	2.47474	2.46107	2.44739	2.43371	2.42003	2.40635	2.37217	2.25249	2.13281	2.01312	1.89344	1.77376	1.65407	1.53439	1.41471	1.29502	1.17534	1.05565	0.935969
2	225	0.159802	0.143183	0.126563	0.109943	0.100099	0.0958025	0.0915059	0.0872093	0.0829127	0.078616	0.0743194	0.0700228	0.0657262	0.0614295	0.0571329	0.0528363	0.0485397	0.0442431	0.0406618	0.037632	0.0346021	0.0315723	0.0285425	0.0255127	0.0224829	0.0194531	0.0164233	0.0133935	0.0103637	0.00733387	0.00430408	0.00127429	0.0404189	0.110178	0.179937	0.249695	0.319454	0.389213	0.458972	0.52873	0.598489	0.668248	0.738006	0.807764	0.877523	0.947281	0.937381	0.873075
2	225	0.056044	0.0990627	0.142081	0.1851	0.228119	0.271137	0.314156	0.357175	0.400193	0.443212	0.486231	0.52925	0.572269	0.612393	0.646298	0.680202	0.714106	0.74801	0.781914	0.815818	0.849722	0.883626	0.917529	0.951433	0.985337	1.01924	1.05315	1.05022	0.973299	0.896376	0.819453	0.742531	0.665608	0.588685	0.511762	0.434839	0.357917	0.280994	0.204072	0.127149	0.0502263	0.000886612	0.00344126	0.00599591	0.00855056	0.0111052	0.0136599	0.0162145
2	225	1.14199	1.12929	1.11659	1.10389	1.09119	1.07849	1.06579	1.05309	1.0404	1.0277	1.015	0.991676	0.968118	0.94456	0.921002	0.897444	0.873887	0.850329	0.826771	0.803213	0.779656	0.756098	0.73254	0.708982	0.685424	0.739063	0.793252	0.847441	0.90163	0.955818	1.01001	1.0642	1.11838	1.17257	1.22676	1.28095	1.33514	1.38933	1.4427	1.3914	1.3401	1.2888	1.2375	1.1862	1.1349	1.08359	1.03229	0.980992
2	270	0.534373	0.492607	0.450842	0.409076	0.367311	0.325545	0.28378	0.242015	0.20025	0.158485	0.116719	0.0749539	0.0331886	0.0122045	0.0716357	0.131067	0.190499	0.24993	0.309361	0.368793	0.428224	0.487655	0.547087	0.606518	0.665949	0.72538	0.784811	0.818069	0.758638	0.699207	0.639775	0.580344	0.520912	0.461481	0.402049	0.342618	0.283187	0.223755	0.164324	0.104893	0.0454618	0.0170399	0.0895351	0.16203	0.234525	0.307021	0.379517	0.452013
2	270	0.524227	0.517464	0.510701	0.503938	0.497175	0.490412	0.483649	0.476886	0.470123	0.46336	0.457038	0.453339	0.44964	0.445941	0.442242	0.438543	0.434844	0.431145	0.427445	0.423746	0.420047	0.416348	0.412649	0.40895	0.413119	0.458943	0.504768	0.550592	0.596417	0.642241	0.688066	0.73389	0.779715	0.825539	0.871363	0.917188	0.963012	1.00884	1.03622	0.975803	0.91539	0.854976	0.794563	0.73415	0.673737	0.613324	0.552911	0.492499
2	270	0	0	0	0	0	0	0.0106124	0.051368	0.0921236	0.132879	0.173635	0.21439	0.255146	0.295901	0.336657	0.377412	0.418167	0.458923	0.499678	0.540433	0.559039	0.519293	0.479547	0.439801	0.400055	0.360309	0.320562	0.280816	0.24107	0.201324	0.161578	0.121832	0.0820866	0.0423408	0.0252252	0.0635405	0.101856	0.140171	0.178486	0.216801	0.255117	0.293432	0.331748	0.370063	0.408378	0.446693	0.485008	0.523323
2	270	0.865601	0.796466	0.727331	0.658196	0.589062	0.524229	0.503729	0.483229	0.462729	0.442229	0.421729	0.401229	0.380728	0.360228	0.339728	0.319228	0.298728	0.278227	0.257727	0.245762	0.307937	0.370113	0.432289	0.494464	0.55664	0.618816	0.680993	0.743169	0.805345	0.867521	0.929697	0.991873	1.05405	1.10798	1.10029	1.09259	1.0849	1.0772	1.06951	1.06182	1.05412	1.04643	1.03873	1.03104	1.02334	1.01565	1.00796	0.997803
2	270	0.801886	0.7421	0.682315	0.622529	0.562743	0.502957	0.443172	0.383386	0.323601	0.263815	0.20403	0.144245	0.0844596	0.0246737	0.00405547	0.0109608	0.0178661	0.0247714	0.0316767	0.038582	0.0454873	0.0523926	0.0592979	0.0662031	0.0731083	0.0800136	0.0869188	0.093824	0.0924145	0.0855092	0.0786039	0.0716986	0.0647933	0.057888	0.0509827	0.0440774	0.0371721	0.0302668	0.0233616	0.0164564	0.00955113	0.00264588	0.0476795	0.124978	0.202276	0.279575	0.356873	0.434171
2	270	1.15177	1.06843	0.985079	0.901732	0.818385	0.735038	0.651692	0.568346	0.485	0.401653	0.318307	0.23496	0.269505	0.319509	0.369513	0.419518	0.469522	0.519527	0.569531	0.619536	0.66954	0.719544	0.769548	0.819552	0.869556	0.91956	0.874752	0.819274	0.763795	0.708316	0.652837	0.597358	0.541879	0.4864	0.430922	0.375443	0.319964	0.264486	0.209007	0.153528	0.164843	0.182472	0.200102	0.217732	0.235361	0.252991	0.27062	0.28825
2	315	0.115315	0.101714	0.155078	0.208442	0.261807	0.315171	0.368536	0.4219	0.475265	0.528629	0.581993	0.635358	0.688722	0.742087	0.795451	0.847116	0.832254	0.817392	0.802531	0.787669	0.772807	0.757946	0.743084	0.728222	0.713361	0.698499	0.683637	0.668776	0.653914	0.638904	0.62031	0.601716	0.583122	0.564528	0.545934	0.52734	0.508745	0.490151	0.471557	0.452963	0.434369	0.415774	0.39718	0.379284	0.373515	0.367745	0.361975	0.356205
2	315	0	0	0	0	0	0	0	0	0	0	0.0140482	0.0416156	0.069183	0.0967502	0.124317	0.151885	0.179452	0.207019	0.234586	0.262154	0.289721	0.317288	0.344856	0.372423	0.371081	0.343514	0.315946	0.288379	0.260812	0.233244	0.205677	0.17811	0.150543	0.122976	0.0954081	0.0678407	0.0402734	0.012706	0.00537566	0.0153473	0.025319	0.0352906	0.0452623	0.0552339	0.0652054	0.075177	0.0851486	0.0951201
2	315	0.691515	0.76575	0.839984	0.914219	0.988454	1.06269	1.13692	1.21116	1.27761	1.23626	1.19491	1.15356	1.1122	1.07085	1.0295	0.988144	0.946791	0.905438	0.864086	0.822732	0.781379	0.740026	0.708789	0.79074	0.87269	0.954641	1.03659	1.11854	1.20049	1.28244	1.36439	1.44634	1.52829	1.61024	1.69219	1.77415	1.85119	1.88242	1.91366	1.9449	1.97613	2.00737	2.03861	2.06984	2.10108	2.13232	2.16355	2.19479
2	315	0.0784584	0.0496052	0.020752	0.0240906	0.109892	0.195692	0.281493	0.367294	0.453094	0.538895	0.624696	0.710497	0.796297	0.882098	0.967899	1.0537	1.1395	1.19514	1.1789	1.16265	1.14641	1.13016	1.11392	1.09767	1.08143	1.06518	1.04894	1.03269	1.01645	1.0002	0.983955	0.963429	0.933387	0.903345	0.873302	0.84326	0.813218	0.783176	0.753134	0.723091	0.693049	0.663007	0.632965	0.602923	0.572881	0.559204	0.579512	0.59982
2	315	1.59223	1.53312	1.45325	1.37338	1.29351	1.21364	1.13377	1.0539	0.974036	0.894167	0.814297	0.734429	0.654561	0.574692	0.494824	0.453812	0.419272	0.384732	0.350191	0.315651	0.281111	0.246571	0.212031	0.177491	0.14295	0.10841	0.0738703	0.0393304	0.00479051	0.0547919	0.117203	0.179615	0.242027	0.304439	0.366851	0.429262	0.491674	0.554086	0.616498	0.67891	0.741322	0.803733	0.866144	0.817843	0.755406	0.692968	0.63053	0.568092
2	315	0	0	0	0	0	0	0	0	0	0	0	0	0	0	0	0	0	0	0	0	0	0	0	0	0	0.00618633	0.029663	0.0531398	0.0766166	0.100093	0.12357	0.147047	0.170524	0.194	0.217477	0.240954	0.26443	0.287907	0.311384	0.344898	0.404442	0.463986	0.523531	0.583076	0.642621	0.702165	0.76171	0.821255
	time(s)=>	0	0.0166618	0.0333237	0.0499855	0.0666473	0.0833093	0.0999712	0.116633	0.133295	0.149957	0.166619	0.183281	0.199943	0.216605	0.233267	0.249929	0.26659	0.283252	0.299914	0.316576	0.333238	0.3499	0.366562	0.383224	0.399886	0.416548	0.43321	0.449872	0.466534	0.483196	0.499857	0.516519	0.533181	0.549843	0.566505	0.583167	0.599829	0.61649	0.633152	0.649814	0.666476	0.683138	0.6998	0.716462	0.733124	0.749786	0.766448	0.78311
neuron	grating direction (deg)
3	0	0.0587405	0	0	0	0	0	0	0	0	0	0	0	0	0	0	0.00138334	0.00493569	0.00848804	0.0120404	0.0155927	0.0191451	0.0226975	0.0262498	0.0298022	0.0333546	0.0369069	0.0404593	0.0440116	0.047564	0.0482446	0.0446922	0.0411399	0.0375876	0.0340352	0.0304829	0.0269305	0.0233781	0.0198258	0.0162734	0.012721	0.00916868	0.00561633	0.00206397	0.00902607	0.0305688	0.0521114	0.073654	0.0951966
3	0	0.995474	0.904585	0.813696	0.722807	0.631919	0.541031	0.450142	0.359254	0.268366	0.177477	0.0865882	0	0	0	0	0	0	0	0	0	0	0	0	0	0	0.00157747	0.0269925	0.0524076	0.0778226	0.103238	0.128653	0.154068	0.179483	0.204898	0.230313	0.255728	0.281143	0.306558	0.331973	0.353483	0.328068	0.302653	0.277238	0.251823	0.226408	0.200993	0.175577	0.150162
3	0	0.0408664	0.0472338	0.0536013	0.0599687	0.0663362	0.0727036	0.079071	0.0854385	0.166753	0.346282	0.525809	0.705337	0.884864	1.06439	1.24392	1.42345	1.60298	1.78251	1.96203	2.14156	2.32109	2.50062	2.5166	2.3307	2.1448	1.95891	1.77301	1.58712	1.40122	1.21533	1.02943	0.843537	0.65764	0.471744	0.285848	0.0999515	0.0313435	0.0991386	0.166934	0.234729	0.302524	0.370318	0.438113	0.505907	0.573702	0.641497	0.709292	0.777088
3	0	0.767152	0.665499	0.563847	0.462194	0.360541	0.322116	0.29765	0.273185	0.248719	0.224253	0.199788	0.175322	0.150857	0.126391	0.101926	0.0774599	0.0529945	0.0285291	0.00406363	0.051998	0.114353	0.176709	0.239064	0.30142	0.363775	0.426131	0.488486	0.550841	0.613196	0.675552	0.737907	0.800262	0.862617	0.819135	0.75678	0.694425	0.632069	0.569714	0.507359	0.445003	0.382648	0.320292	0.257937	0.195581	0.133226	0.0708706	0.00851568	0
3	0	1.2364	1.26393	1.17282	1.08171	0.990603	0.899494	0.808385	0.717276	0.626167	0.535058	0.443949	0.352839	0.26173	0.170621	0.0795121	0	0	0	0	0	0	0	0	0	0	0	0	0	0	0.00267659	0.0215192	0.0403618	0.0592044	0.0780471	0.0968897	0.115732	0.134575	0.153418	0.17226	0.191103	0.209946	0.228788	0.247631	0.26064	0.242279	0.223919	0.205558	0.187198
3	0	0.072101	0.105792	0.139483	0.173174	0.206865	0.240556	0.274247	0.307938	0.341629	0.37532	0.409011	0.442702	0.482461	0.555335	0.628209	0.701084	0.773958	0.846833	0.919707	0.992582	1.06546	1.13833	1.21121	1.28408	1.35695	1.42983	1.47226	1.3657	1.25913	1.15257	1.046	0.939438	0.832872	0.726307	0.619741	0.513175	0.40661	0.300044	0.193478	0.0869125	0	0	0	0	0	0	0	0
3	45	1.89995	1.76765	1.63535	1.50305	1.37075	1.23845	1.10615	1.08814	1.08355	1.07896	1.07437	1.06978	1.06519	1.0606	1.05601	1.05142	1.04683	1.04224	1.03765	1.03306	1.02847	0.966339	0.898491	0.830643	0.762794	0.694946	0.627097	0.559248	0.4914	0.423551	0.355703	0.287854	0.220005	0.152157	0.0843087	0.0739466	0.0682849	0.0626232	0.0569616	0.0512998	0.0456381	0.0399764	0.0343147	0.0286529	0.0229912	0.0173295	0.0116678	0.00600607
3	45	0	0	0	0	0	0	0	0	0	0	0	0	0	0	0	0	0	0	0.0449165	0.09321	0.141504	0.189797	0.238091	0.286384	0.334677	0.38297	0.431263	0.479556	0.527849	0.576143	0.624436	0.672729	0.68801	0.701362	0.714714	0.728067	0.741419	0.754772	0.768124	0.781476	0.794828	0.808181	0.821533	0.834885	0.848238	0.86159	0.814158	0.764166
3	45	0	0	0	0	0	0	0	0	0	0	0	0	0	0	0	0.0142906	0.0433225	0.0723545	0.101386	0.130418	0.15945	0.188483	0.217515	0.246547	0.275579	0.304611	0.333643	0.362675	0.391707	0.3913	0.362268	0.333236	0.304204	0.275173	0.246141	0.217108	0.188076	0.159044	0.130012	0.10098	0.0719479	0.0429158	0.0138837	0	0	0	0	0
3	45	2.33947	2.16152	1.98357	1.80562	1.62767	1.44973	1.27178	1.09383	0.915879	0.737931	0.559983	0.382035	0.321924	0.370831	0.419738	0.468645	0.517552	0.56646	0.615367	0.664274	0.713182	0.762089	0.810996	0.859904	0.908811	0.957718	0.943045	0.872935	0.802826	0.732717	0.662607	0.592497	0.522387	0.452278	0.382168	0.312058	0.241948	0.171839	0.101729	0.0316191	0	0	0	0	0	0	0	0
3	90	0.301982	0.279645	0.257308	0.234971	0.212633	0.190296	0.167959	0.145622	0.123285	0.100948	0.0786112	0.0562743	0.0339373	0.0116003	0.01138	0.0350551	0.0587302	0.0824053	0.10608	0.129756	0.153431	0.177106	0.200781	0.224456	0.248131	0.271806	0.295481	0.319156	0.335511	0.344412	0.353312	0.362213	0.371114	0.380015	0.388915	0.397816	0.406717	0.415618	0.424518	0.433419	0.44232	0.45122	0.438956	0.40638	0.373804	0.341228	0.308652	0.276077
3	90	2.03117	1.85043	1.6697	1.48896	1.30822	1.12748	0.946746	0.766007	0.585268	0.404529	0.22379	0.24079	0.314028	0.387265	0.460502	0.533739	0.606976	0.680212	0.753449	0.826686	0.899922	0.973159	1.0464	1.11963	1.19287	1.13948	1.05311	0.966727	0.88035	0.793972	0.707595	0.621218	0.534841	0.448464	0.362087	0.275711	0.189333	0.102956	0.0165782	0.0908796	0.203344	0.315809	0.428274	0.540739	0.653204	0.765669	0.878133	0.990597
3	90	0.442003	0.399448	0.356893	0.314337	0.271782	0.229227	0.186672	0.144117	0.101561	0.0590057	0.0164502	0	0	0	0	0	0	0	0	0	0	0	0	0	0	0.00578276	0.0149879	0.0241931	0.0333982	0.0426034	0.0518085	0.0610137	0.0702188	0.0794239	0.088629	0.0978341	0.107039	0.116244	0.125449	0.122817	0.113612	0.104407	0.0952016	0.0859964	0.0767913	0.0675861	0.058381	0.0491758
3	135	0.964186	0.895977	0.827768	0.759558	0.691349	0.623139	0.554929	0.48672	0.418511	0.350301	0.282092	0.213882	0.145673	0.0774643	0.0186558	0.0305289	0.042402	0.0542751	0.0661482	0.0780214	0.0898945	0.101768	0.113641	0.125514	0.137387	0.14926	0.161133	0.173006	0.199675	0.323476	0.447277	0.571078	0.69488	0.818681	0.942483	1.06629	1.19009	1.31389	1.43769	1.56149	1.68529	1.8091	1.89457	1.75766	1.62076	1.48385	1.34694	1.21003
3	135	0.219427	0.264575	0.309723	0.354871	0.400019	0.445167	0.490315	0.535463	0.580611	0.625759	0.591902	0.546754	0.501607	0.456459	0.411311	0.366163	0.321015	0.275867	0.230719	0.185571	0.140423	0.0952752	0.0501271	0.00497899	0.123272	0.261824	0.400375	0.538927	0.677479	0.81603	0.954581	1.09313	1.23168	1.37023	1.50879	1.64734	1.78589	1.92444	1.81236	1.67381	1.53526	1.39671	1.25815	1.1196	0.981052	0.842501	0.703949	0.565398
3	135	0	0	0	0	0	0	0	0.0116547	0.0336702	0.0556857	0.0777013	0.0997168	0.121732	0.143748	0.165764	0.187779	0.209795	0.23181	0.253826	0.275841	0.297856	0.295912	0.273897	0.251882	0.229866	0.20785	0.185835	0.163819	0.141804	0.119788	0.0977727	0.0757571	0.0537416	0.0317262	0.00971078	0	0	0	0	0	0	0	0	0	0	0	0	0
3	135	1.21615	1.31742	1.41868	1.51995	1.58139	1.4668	1.35222	1.23763	1.12304	1.00845	0.893864	0.779276	0.66469	0.550103	0.435516	0.320929	0.206342	0.0917539	0.0125512	0.0755375	0.138524	0.20151	0.264497	0.327483	0.39047	0.453456	0.516443	0.579429	0.642415	0.705401	0.768387	0.831373	0.884198	0.899706	0.915213	0.930721	0.946229	0.961737	0.977245	0.992752	1.00826	1.02377	1.03928	1.05478	1.07029	1.0858	1.09555	1.08589
3	135	1.11901	1.03779	0.956572	0.875353	0.794135	0.712916	0.631697	0.550479	0.469261	0.388043	0.306824	0.225606	0.144387	0.063169	0	0	0	0	0	0	0	0	0	0	0	0	0	0	0	0	0	0	0	0	0	0	0	0	0	0	0	0	0	0	0	0	0	0
3	135	0.713505	0.689893	0.666282	0.64267	0.619058	0.595446	0.571834	0.548222	0.524611	0.500999	0.47358	0.438866	0.404152	0.369438	0.334724	0.30001	0.265296	0.230582	0.195868	0.161154	0.12644	0.091726	0.0570118	0.0222977	0.0310168	0.117734	0.204451	0.291168	0.377885	0.464603	0.55132	0.638037	0.724754	0.811471	0.898187	0.984905	1.07162	1.15834	1.19543	1.14891	1.10238	1.05586	1.00934	0.962812	0.916288	0.869765	0.823241	0.776717
3	180	0.00125173	0	0	0	0	0	0	0	0	0	0	0	0	0	0	0	0	0	0	0	0	0	0	0	0	0	0	0	0	0	0	0	0	0	0	0	0	0	0	0	0	0	0	0	0	0	0	0
3	180	0	0	0	0	0	0	0	0	0	0	0	0	0	0	0	0	0	0	0	0	0	0	0	0	0	0	0	0	0	0	0	0	0	0	0	0	0	0	0	0	0	0	0	0	0	0	0	0
3	180	0.494997	0.567967	0.640937	0.713907	0.786877	0.859847	0.932816	1.00579	0.979587	0.928341	0.877095	0.82585	0.774604	0.723358	0.672112	0.620866	0.56962	0.518374	0.467128	0.415882	0.364636	0.31339	0.320808	0.34171	0.362611	0.383513	0.404415	0.425317	0.446218	0.46712	0.488022	0.508923	0.529825	0.550727	0.571629	0.592531	0.56084	0.518214	0.475589	0.432964	0.390338	0.347713	0.305087	0.262462	0.219836	0.177211	0.134585	0.0919595
3	180	0.645511	0.713898	0.782286	0.850673	0.91906	0.925381	0.856993	0.788606	0.720218	0.651831	0.583443	0.515056	0.446668	0.378281	0.309893	0.241506	0.173119	0.104732	0.0363445	0	0	0	0	0	0	0	0	0	0	0	0	0	0	0	0	0	0	0	0	0	0	0	0	0	0	0	0	0
3	180	0.0989577	0.107549	0.116141	0.124732	0.133324	0.141915	0.150506	0.159098	0.167689	0.176281	0.184872	0.193464	0.202055	0.210646	0.196682	0.181591	0.1665	0.151408	0.136317	0.121226	0.106134	0.0910432	0.075952	0.0608608	0.0457695	0.0306781	0.0155868	0.000495509	0	0	0	0	0	0	0	0	0	0	0	0	0	0	0	0	0	0	0	0
3	225	1.1938	1.11725	1.0407	0.964146	0.887595	0.811044	0.734493	0.657942	0.581391	0.504841	0.42829	0.35174	0.27519	0.198639	0.175393	0.162047	0.1487	0.135354	0.122008	0.108662	0.0953155	0.0819693	0.0686231	0.055277	0.0419309	0.0285848	0.0152387	0.00189258	0	0	0	0	0	0	0	0	0	0	0	0	0	0	0	0	0	0	0	0
3	225	0.960765	0.851086	0.741407	0.631728	0.522049	0.412371	0.302692	0.193013	0.083334	0	0	0	0	0	0	0	0	0	0	0	0	0	0	0	0	0	0	0	0	0	0	0	0	0	0	0	0	0	0	0	0	0	0	0	0	0	0	0
3	225	0	0	0	0	0	0	0	0.000269834	0.00191631	0.00356279	0.00520926	0.00685574	0.00850223	0.0101487	0.0117952	0.0134417	0.0150882	0.0167347	0.0183811	0.0200276	0.0216741	0.0227323	0.0210859	0.0194394	0.0177929	0.0161464	0.0145	0.0128535	0.011207	0.00956049	0.007914	0.00626751	0.00462103	0.00297454	0.00132805	0	0	0	0	0	0	0	0	0	0	0	0	0
3	225	0.121602	0.133144	0.144687	0.156229	0.197714	0.263707	0.329699	0.395692	0.461684	0.527676	0.593668	0.659661	0.725653	0.791645	0.857637	0.923629	0.989622	1.05561	1.04056	0.963028	0.885493	0.807957	0.730422	0.652887	0.575353	0.497818	0.420283	0.342748	0.265213	0.187679	0.110144	0.0326099	0.0360432	0.09825	0.160457	0.222664	0.284871	0.347077	0.409284	0.471491	0.533697	0.595904	0.65811	0.720317	0.782523	0.844729	0.833013	0.770806
3	225	0	0	0	0	0	0	0	0	0	0	0	0	0	0.00145929	0.00605493	0.0106506	0.0152462	0.0198418	0.0244374	0.029033	0.0336286	0.0382242	0.0428198	0.0474155	0.0520111	0.0566067	0.0612023	0.0763567	0.112728	0.149098	0.185469	0.22184	0.258211	0.294582	0.330952	0.367323	0.403694	0.440064	0.476435	0.512806	0.549176	0.558707	0.51774	0.476774	0.435807	0.394841	0.353874	0.312908
3	225	0.682368	0.623647	0.564925	0.506204	0.447482	0.388759	0.330037	0.271315	0.212593	0.153871	0.0951492	0.0953491	0.0968645	0.0983799	0.0998953	0.101411	0.102926	0.104441	0.105957	0.107472	0.108988	0.110503	0.112018	0.113534	0.115049	0.134948	0.154978	0.175009	0.195039	0.215069	0.235098	0.255128	0.275158	0.295188	0.315218	0.335248	0.355278	0.375308	0.394966	0.366709	0.338452	0.310194	0.281937	0.25368	0.225423	0.197165	0.168908	0.140651
3	270	0.299292	0.29969	0.300089	0.300487	0.300885	0.301284	0.301682	0.30208	0.302479	0.302877	0.303275	0.303673	0.304072	0.299919	0.278154	0.256388	0.234623	0.212858	0.191093	0.169328	0.147563	0.125798	0.104033	0.0822675	0.0605025	0.0387374	0.0169724	0	0	0	0	0	0	0	0	0	0	0	0	0	0	0.0332873	0.174906	0.316525	0.458143	0.599763	0.741383	0.883002
3	270	0.4034	0.383742	0.364083	0.344425	0.324767	0.305108	0.28545	0.265791	0.246133	0.226474	0.207488	0.192498	0.177507	0.162516	0.147526	0.132535	0.117544	0.102553	0.0875628	0.0725721	0.0575814	0.0425907	0.0275999	0.0126092	0	0	0	0	0	0	0	0	0	0	0	0	0	0	0.00010081	0.000681437	0.00126206	0.00184269	0.00242331	0.00300394	0.00358456	0.00416519	0.00474581	0.00532644
3	270	0	0	0	0	0	0	0	0	0	0	0	0	0	0	0	0	0	0	0	0	0.00165838	0.00768564	0.0137129	0.0197402	0.0257674	0.0317947	0.037822	0.0438492	0.0498765	0.0559038	0.061931	0.0679582	0.0739854	0.0800126	0.0846798	0.0860156	0.0873514	0.0886871	0.0900229	0.0913587	0.0926945	0.0940303	0.0953661	0.0967019	0.0980377	0.0993735	0.100709	0.102045
3	270	0.0218842	0.0242961	0.0267079	0.0291197	0.0315316	0.0386256	0.0939677	0.14931	0.204652	0.259994	0.315337	0.370679	0.426022	0.481364	0.536707	0.592049	0.647392	0.702734	0.758077	0.801973	0.74644	0.690906	0.635373	0.579839	0.524305	0.468771	0.413237	0.357703	0.302169	0.246635	0.191101	0.135567	0.0800334	0.0326878	0.0465529	0.060418	0.0742831	0.0881482	0.102013	0.115878	0.129744	0.143609	0.157474	0.171339	0.185204	0.19907	0.212935	0.222824
3	270	0.222237	0.216134	0.210031	0.203928	0.197825	0.191722	0.18562	0.179517	0.173414	0.167311	0.161208	0.155106	0.149003	0.1429	0.134486	0.124448	0.11441	0.104372	0.0943346	0.0842968	0.0742589	0.0642211	0.0541832	0.0441455	0.0341077	0.02407	0.0140322	0.00399446	0	0	0	0	0	0	0	0	0	0	0	0	0	0	0.0127464	0.033411	0.0540756	0.0747402	0.0954048	0.116069
3	270	0.674046	0.613408	0.55277	0.492131	0.431493	0.370855	0.310218	0.24958	0.188943	0.128305	0.067668	0.00703009	0.0690811	0.147222	0.225362	0.303502	0.381643	0.459783	0.537924	0.616064	0.694205	0.772345	0.850485	0.928624	1.00676	1.0849	1.02257	0.944433	0.866293	0.788153	0.710012	0.631872	0.553731	0.475591	0.39745	0.31931	0.24117	0.16303	0.0848897	0.0067497	0.0386413	0.0809362	0.123231	0.165526	0.207821	0.250116	0.292411	0.334706
3	315	0	0	0	0	0	0	0	0	0	0	0	0	0	0	0	0	0	0	0	0	0	0	0	0	0	0	0	0	0	4.30258e-05	0.00112705	0.00221108	0.00329511	0.00437913	0.00546317	0.0065472	0.00763124	0.00871527	0.00979931	0.0108833	0.0119674	0.0130514	0.0141355	0.0157309	0.0262024	0.036674	0.0471455	0.0576171
3	315	0	0	0	0	0	0	0	0	0	0	0	0	0	0	0	0	0	0	0	0	0	0	0	0	0.00597331	0.0173653	0.0287572	0.0401491	0.051541	0.0629329	0.0743247	0.0857166	0.0971084	0.1085	0.119892	0.131284	0.142676	0.154068	0.153177	0.141785	0.130393	0.119001	0.107609	0.0962176	0.0848258	0.0734339	0.0620421	0.0506502
3	315	0	0	0	0	0	0	0	0	0	0	0	0	0	0	0	0	0	0	0	0	0	0	0.00336066	0.0443246	0.0852883	0.126252	0.167216	0.208179	0.249143	0.290107	0.331071	0.372034	0.412998	0.453962	0.494926	0.53589	0.569921	0.539255	0.508589	0.477923	0.447257	0.416592	0.385926	0.35526	0.324595	0.293929	0.263263	0.232597
3	315	0	0	0	0.00609397	0.0277982	0.0495024	0.0712065	0.0929106	0.114615	0.136319	0.158023	0.179727	0.201431	0.223135	0.24484	0.266544	0.288248	0.297124	0.27542	0.253716	0.232011	0.210307	0.188603	0.166899	0.145195	0.123491	0.101787	0.0800824	0.0583783	0.0366742	0.0149699	0.00780063	0.0329415	0.0580824	0.0832233	0.108364	0.133505	0.158646	0.183786	0.208927	0.234068	0.259209	0.284349	0.30949	0.334631	0.347306	0.334095	0.320884
3	315	0.473927	0.449755	0.415534	0.381313	0.347093	0.312872	0.278651	0.24443	0.210209	0.175989	0.141768	0.107547	0.0733269	0.0391065	0.00488596	0	0	0	0	0	0	0	0	0	0	0	0	0	0	0.0719405	0.154441	0.236943	0.319444	0.401946	0.484447	0.566949	0.64945	0.731952	0.814453	0.896955	0.979456	1.06196	1.14446	1.08064	0.998139	0.915639	0.833137	0.750636
3	315	0.259308	0.235189	0.211071	0.186952	0.162833	0.138714	0.114595	0.0904763	0.0663574	0.0422385	0.0181197	0.0112986	0.0567232	0.102148	0.147572	0.192997	0.238421	0.283846	0.32927	0.374694	0.420119	0.465543	0.510967	0.556392	0.601816	0.623301	0.577877	0.532452	0.487027	0.441603	0.396178	0.350754	0.305329	0.259905	0.21448	0.169056	0.123632	0.0782074	0.0327831	0	0	0	0	0	0	0	0	0
	time(s)=>	0	0.0166618	0.0333237	0.0499855	0.0666473	0.0833093	0.0999712	0.116633	0.133295	0.149957	0.166619	0.183281	0.199943	0.216605	0.233267	0.249929	0.26659	0.283252	0.299914	0.316576	0.333238	0.3499	0.366562	0.383224	0.399886	0.416548	0.43321	0.449872	0.466534	0.483196	0.499857	0.516519	0.533181	0.549843	0.566505	0.583167	0.599829	0.61649	0.633152	0.649814	0.666476	0.683138	0.6998	0.716462	0.733124	0.749786	0.766448	0.78311
neuron	grating direction (deg)
4	0	0.784004	0.73163	0.679256	0.626882	0.574509	0.522134	0.46976	0.417386	0.365012	0.323589	0.299799	0.27601	0.25222	0.228431	0.204641	0.180852	0.157062	0.133273	0.109483	0.0856936	0.0619039	0.0381142	0.0143246	0	0	0	0	0	0	0	0	0	0	0	0	0	0	0.0140451	0.0480819	0.0821187	0.116155	0.150192	0.184229	0.218265	0.252302	0.286339	0.320375	0.354412
4	0	0	0	0	0	0	0	0	0	0	0	0	0	0	0	0	0	0	0	0	0.00181364	0.0343358	0.066858	0.0993801	0.131902	0.164425	0.196947	0.22947	0.261992	0.294514	0.327037	0.359559	0.392082	0.424604	0.45254	0.420017	0.387495	0.354973	0.322451	0.289929	0.257406	0.224884	0.192361	0.159839	0.127317	0.0947944	0.0622719	0.0297495	0
4	0	0.542561	0.520456	0.492294	0.455986	0.419678	0.383369	0.347061	0.310753	0.274445	0.238136	0.201828	0.16552	0.129212	0.0929043	0.0565963	0.0202879	0	0	0	0	0	0	0	0	0	0	0	0	0	0	0.0258911	0.0826716	0.139452	0.196233	0.253013	0.309793	0.366574	0.423354	0.480135	0.536915	0.593695	0.650475	0.707255	0.764035	0.767358	0.710578	0.653797	0.597017
4	0	0.222325	0.20406	0.185796	0.167531	0.149266	0.131002	0.112737	0.0944724	0.0762077	0.057943	0.0396783	0.0214137	0.00314901	0	0	0	0	0	0	0	0	0	0	0	0	0	0	0	0	0	0	0	0	0	0	0	0	0	0	0	0	0	0	0	0	0	0	0
4	0	0	0	0	0	0	0	0	0	0	0.00351519	0.0325811	0.0616469	0.0907128	0.119779	0.148844	0.17791	0.206976	0.236041	0.265107	0.294173	0.323238	0.352304	0.38137	0.402547	0.373481	0.344415	0.315349	0.286283	0.257218	0.228152	0.199086	0.170021	0.140955	0.111889	0.0828235	0.0537577	0.024692	0	0	0	0	0	0	0	0	0	0	0
4	0	0.608541	0.683358	0.758175	0.832991	0.907809	0.982626	1.04173	1.01073	0.979739	0.948745	0.91775	0.886756	0.855762	0.824768	0.793774	0.76278	0.731786	0.700792	0.669798	0.638803	0.605915	0.563324	0.520733	0.478141	0.43555	0.392959	0.350368	0.307777	0.265186	0.222595	0.180004	0.137412	0.0948215	0.0522304	0.0373535	0.150399	0.263444	0.376489	0.489534	0.602579	0.715624	0.828669	0.941713	1.05476	1.1678	1.28085	1.39389	1.50694
4	45	0	0	0	0	0	0	0	0	0	0	0	0	0	0	0	0.0283971	0.0598328	0.0912685	0.122704	0.15414	0.185576	0.217011	0.248447	0.279883	0.311318	0.342754	0.37419	0.405626	0.437062	0.445473	0.45183	0.458187	0.464544	0.470901	0.477258	0.483615	0.489972	0.496329	0.502686	0.509043	0.515401	0.521758	0.528115	0.493287	0.455494	0.417701	0.379908	0.342115
4	45	0.720717	0.655648	0.590579	0.52551	0.460441	0.395373	0.330304	0.265235	0.200166	0.135098	0.0700296	0.00496136	0	0	0	0	0	0	0	0	0	0	0	0	0	0	0	0	0	0	0	0	0	0	0	0	0	0	0	0	0.0287997	0.0590109	0.0892221	0.119433	0.149645	0.179856	0.210067	0.240279
4	45	0.36175	0.35735	0.35295	0.348551	0.344151	0.339751	0.335352	0.330952	0.326552	0.313023	0.289835	0.266647	0.243459	0.220271	0.197083	0.173895	0.150707	0.127519	0.104331	0.0811429	0.0579548	0.0347666	0.0115785	0.0548324	0.16435	0.273867	0.383385	0.492902	0.60242	0.711937	0.821454	0.930971	1.04049	1.15	1.25952	1.36904	1.47856	1.54447	1.5694	1.59432	1.61924	1.64417	1.66909	1.69402	1.71894	1.74386	1.76879	1.79371
4	45	0	0	0	0	0	0	0	0	0	0	0	0	0	0	0	0	0	0	0	0	0	0	0	0	0	0	0	0	0	0	0	0	0	0	0.0271064	0.0770571	0.127008	0.176959	0.226909	0.27686	0.32681	0.376761	0.426711	0.476661	0.526612	0.576563	0.626513	0.676464
4	90	0.148693	0.171712	0.194731	0.21775	0.24077	0.263789	0.286808	0.309828	0.417274	0.618284	0.819294	1.0203	1.22131	1.42232	1.62333	1.82435	2.02536	2.22637	2.42738	2.62839	2.8294	3.03041	3.02351	2.79948	2.57546	2.35143	2.1274	1.90337	1.67934	1.45531	1.23128	1.00725	0.78322	0.559189	0.335159	0.111128	0.0111172	0.033177	0.0552367	0.0772963	0.099356	0.121416	0.143475	0.165535	0.187595	0.209654	0.231714	0.253774
4	90	0.315676	0.348028	0.38038	0.412732	0.445084	0.541981	0.657915	0.773849	0.889783	1.00572	1.12165	1.23758	1.35352	1.46945	1.58539	1.70132	1.81725	1.93319	2.04912	2.04658	2.01197	1.97737	1.94276	1.90815	1.87355	1.83894	1.80433	1.76973	1.73512	1.70051	1.66591	1.6313	1.5967	1.53195	1.45975	1.38755	1.31535	1.24315	1.17095	1.09876	1.02656	0.954357	0.882158	0.809959	0.73776	0.665561	0.593362	0.58821
4	90	1.73715	1.91825	2.09935	2.28044	2.46154	2.42274	2.24165	2.06055	1.87945	1.69835	1.51726	1.33616	1.15506	0.973963	0.792865	0.611767	0.430669	0.249571	0.0684746	0.0353242	0.0921256	0.148927	0.205728	0.26253	0.319332	0.376134	0.432936	0.489738	0.54654	0.603341	0.660143	0.716945	0.773747	0.758221	0.70142	0.644618	0.587817	0.531015	0.474213	0.417412	0.36061	0.303808	0.247006	0.190204	0.133402	0.0766004	0.0197986	0
4	135	0	0	0	0	0	0	0	0	0	0	0	0	0	0	0	0	0	0	0	0	0	0	0.018741	0.167657	0.316573	0.465489	0.614406	0.763321	0.912236	1.06115	1.21007	1.35898	1.5079	1.65681	1.80573	1.95465	2.06167	1.91276	1.76384	1.61492	1.46601	1.31709	1.16818	1.01926	0.870347	0.721432	0.572517	0.423601
4	135	0.267765	0.182255	0.0967448	0.0112347	0	0	0	0	0	0	0	0	0	0	0	0	0	0	0.0701384	0.149537	0.228936	0.308334	0.387733	0.467132	0.54653	0.625928	0.705327	0.784725	0.864123	0.943521	1.02292	1.10232	1.03909	0.959696	0.880297	0.800899	0.7215	0.642102	0.562703	0.483305	0.403906	0.324508	0.24511	0.165711	0.0863132	0.0069151	0	0
4	135	0.0137751	0	0	0	0	0	0	0	0	0	0	0	0	0	0	0.0509747	0.145752	0.24053	0.335307	0.430083	0.52486	0.619637	0.714414	0.809191	0.903969	0.998746	1.09352	1.1883	1.28308	1.27311	1.17833	1.08356	0.988778	0.894001	0.799224	0.704447	0.609671	0.514894	0.420116	0.325339	0.230562	0.135784	0.041007	0.05996	0.165647	0.271334	0.377022	0.482709
4	135	0.222852	0.203978	0.185103	0.166229	0.147354	0.12848	0.109605	0.0907305	0.0718559	0.0529814	0.0341069	0.0152323	0	0	0	0	0	0	0	0	0	0	0	0	0	0	0	0	0	0	0	0	0	0	0	0	0	0	0	0	0	0	0	0	0	0	0	0
4	135	0.103342	0.120007	0.136672	0.153337	0.170002	0.186667	0.203332	0.219997	0.229465	0.2128	0.196135	0.179471	0.162806	0.146141	0.129476	0.112811	0.0961456	0.0794806	0.0628156	0.0461506	0.0294855	0.0128205	0.00588171	0.031378	0.0568742	0.0823705	0.107867	0.133363	0.158859	0.184356	0.209852	0.235348	0.260845	0.286341	0.311838	0.337334	0.35131	0.329873	0.308436	0.287	0.265563	0.244126	0.222689	0.201252	0.179815	0.158378	0.136941	0.115504
4	135	0.0869034	0.0953228	0.103742	0.112162	0.12223	0.135547	0.148865	0.162183	0.175501	0.188818	0.202136	0.215454	0.228771	0.242089	0.255407	0.268724	0.282042	0.29536	0.304397	0.305531	0.306665	0.307799	0.308933	0.310067	0.311201	0.312335	0.313469	0.314602	0.315736	0.31687	0.318004	0.319138	0.313862	0.297488	0.281114	0.264741	0.248367	0.231993	0.215619	0.199245	0.182871	0.166497	0.150123	0.133749	0.117375	0.101001	0.0883892	0.0818921
4	180	0.785527	0.922558	1.05959	1.19662	1.33365	1.47068	1.60772	1.74475	1.88178	1.81401	1.67697	1.53994	1.40291	1.26588	1.12885	0.991823	0.854792	0.717761	0.580729	0.443698	0.306667	0.169635	0.0326038	0	0	0	0	0	0	0	0	0	0	0	0	0	0	0	0	0	0	0	0	0	0	0	0	0
4	180	0	0	0	0	0	0	0	0	0	0	0	0	0	0	0	0	0	0	0	0.00204435	0.00689566	0.011747	0.0165983	0.0214496	0.0263009	0.0311522	0.0360035	0.0408549	0.0457062	0.0505576	0.0554089	0.0602602	0.0651115	0.0670526	0.0652313	0.0634101	0.0615889	0.0597676	0.0579464	0.0561252	0.054304	0.0524827	0.0506615	0.0488402	0.047019	0.0451978	0.0433765	0.0410102
4	180	0	0	0.0188584	0.0426686	0.0664787	0.0902889	0.114099	0.137909	0.161719	0.185529	0.209339	0.233149	0.256959	0.280769	0.304579	0.328389	0.31378	0.28997	0.26616	0.24235	0.21854	0.19473	0.17092	0.14711	0.1233	0.0994897	0.0756796	0.0518695	0.0280594	0.00424934	0	0	0	0	0	0	0	0	0	0	0	0	0	0	0	0	0	0
4	180	0.650171	0.598314	0.546458	0.494601	0.442744	0.390887	0.33903	0.287173	0.235316	0.183459	0.131601	0.0797442	0.0278871	0	0	0	0	0	0	0	0	0	0	0	0	0	0	0.0191875	0.0594139	0.0996403	0.139867	0.180093	0.220319	0.260545	0.300772	0.340998	0.381224	0.42145	0.461677	0.501903	0.542129	0.578294	0.610259	0.642225	0.674191	0.706156	0.738122	0.770087
4	180	0	0	0	0	0	0	0	0	0.0642874	0.13224	0.200192	0.268145	0.336098	0.40405	0.472003	0.539955	0.607908	0.675861	0.743813	0.811765	0.879717	0.947669	0.885039	0.817087	0.749134	0.681182	0.613229	0.545277	0.477324	0.409372	0.341419	0.273467	0.205514	0.137561	0.0696092	0.00165712	0	0	0	0	0	0	0	0	0	0	0	0
4	225	0.677672	0.669447	0.661222	0.652997	0.644772	0.636547	0.628322	0.620097	0.586803	0.548628	0.510453	0.472277	0.434102	0.395927	0.357751	0.319576	0.2814	0.243224	0.205049	0.166873	0.128698	0.0905223	0.13318	0.189896	0.246611	0.303326	0.360042	0.416757	0.473472	0.530188	0.586904	0.643619	0.700335	0.757051	0.813767	0.870482	0.82363	0.760845	0.698061	0.635278	0.572494	0.509711	0.446927	0.384144	0.32136	0.258576	0.195792	0.133008
4	225	1.59614	1.2825	0.968857	0.750818	0.845991	0.941163	1.03634	1.13151	1.22668	1.32185	1.41703	1.5122	1.60737	1.70254	1.79772	1.89289	1.98806	2.03124	1.91726	1.80328	1.68931	1.57533	1.46135	1.34738	1.2334	1.11942	1.00545	0.891474	0.777498	0.663523	0.549546	0.468803	0.481007	0.493211	0.505415	0.517619	0.529824	0.542028	0.554232	0.566436	0.57864	0.590844	0.603048	0.615252	0.627456	0.623612	0.578116	0.532621
4	225	1.55487	1.63864	1.53772	1.43681	1.3359	1.23498	1.13407	1.03316	0.932242	0.831329	0.730416	0.629502	0.528588	0.427674	0.32676	0.240238	0.222845	0.205453	0.188061	0.170669	0.153276	0.135884	0.118492	0.1011	0.0837077	0.0663156	0.0489234	0.0315311	0.0141388	0	0	0	0	0	0	0	0	0	0	0	0	0	0	0.00230043	0.0136988	0.0250973	0.0364957	0.0478941
4	225	0	0	0	0	0	0	0	0	0	0	0	0	0	0	0	0	0	0	0	0	0	0	0	0	0	0	0	0	0	0	0	0	0	0	0	0	0	0	0	0	0.0067267	0.0181693	0.0296119	0.0410544	0.0524969	0.0639395	0.075382	0.0868245
4	225	0.354126	0.40266	0.451194	0.499728	0.548262	0.596796	0.64533	0.679423	0.681554	0.683684	0.685815	0.687946	0.690077	0.692208	0.694339	0.69647	0.698601	0.700731	0.702862	0.704993	0.707124	0.72078	0.758265	0.795751	0.833237	0.870723	0.908209	0.945695	0.983181	1.02067	1.05815	1.09564	1.13312	1.17061	1.2081	1.20277	1.11462	1.02647	0.938321	0.850171	0.76202	0.673869	0.585718	0.497567	0.409416	0.321265	0.233114	0.144963
4	225	0.119175	0.08959	0.0600047	0.0304195	0.00083392	0	0	0	0	0	0	0	0	0	0	0	0	0	0	0	0	0	0	0	0	0	0	0	0	0	0	0	0.000173098	0.126614	0.253056	0.379498	0.50594	0.632382	0.758823	0.885265	1.01171	1.13815	1.26459	1.39103	1.51747	1.64392	1.76627	1.63983
4	270	0	0	0	0	0	0	0	0.00480245	0.0289356	0.0530687	0.0772019	0.101335	0.125468	0.149602	0.173735	0.197868	0.222001	0.246135	0.270268	0.294401	0.318534	0.334797	0.322126	0.309455	0.296783	0.284112	0.271441	0.25877	0.246099	0.233428	0.220756	0.208085	0.195414	0.182743	0.170072	0.157677	0.146215	0.134753	0.123291	0.111829	0.100367	0.0889049	0.0774429	0.0659809	0.0545189	0.0430569	0.0315948	0.0201327
4	270	0.623626	0.674309	0.724993	0.775676	0.819664	0.821751	0.823839	0.825926	0.828014	0.830101	0.832189	0.834276	0.836364	0.838451	0.840539	0.842626	0.844714	0.846801	0.841948	0.798534	0.75512	0.711707	0.668292	0.624878	0.581464	0.53805	0.494636	0.451222	0.407809	0.364395	0.320981	0.277567	0.247616	0.284675	0.321733	0.358791	0.395849	0.432907	0.469966	0.507024	0.544082	0.581141	0.618199	0.655257	0.692315	0.729374	0.769958	0.826383
4	270	0.0199684	0.098558	0.177148	0.255737	0.334327	0.412917	0.491507	0.570098	0.648688	0.727278	0.805868	0.884459	0.963049	1.04164	1.07797	0.999382	0.920793	0.842203	0.763613	0.685024	0.606434	0.527843	0.449253	0.370663	0.292073	0.213483	0.134892	0.0563021	0	0	0	0	0	0	0	0	0	0	0	0	0	0	0.0109738	0.047755	0.0845362	0.121317	0.158098	0.194879
4	270	0.0106683	0.0205269	0.0303855	0.0402441	0.0501027	0.0599612	0.0698197	0.0796783	0.0895368	0.0993954	0.109254	0.119113	0.128971	0.136919	0.127061	0.117202	0.107344	0.0974849	0.0876263	0.0777678	0.0679093	0.0580508	0.0481922	0.0383337	0.0284751	0.0186165	0.00875788	0	0	0	0	0	0	0	0	0	0	0	0	0	0	0.013576	0.120978	0.228381	0.335783	0.443186	0.550588	0.65799
4	270	0.261287	0.251059	0.240831	0.230603	0.220375	0.210147	0.199919	0.189691	0.177703	0.164446	0.151189	0.137932	0.124674	0.111417	0.0981598	0.0849026	0.0716453	0.0583881	0.0451308	0.0318736	0.0186164	0.00535912	0	0	0	0	0	0	0	0	0	0	0	0	0	0	0.00101706	0.00268294	0.0043488	0.00601467	0.00768054	0.00934641	0.0110123	0.0126782	0.014344	0.0160099	0.0176758	0.0193417
4	270	0.554163	0.595445	0.636726	0.678008	0.71929	0.760572	0.717566	0.662821	0.608077	0.553332	0.498588	0.443843	0.389098	0.334353	0.279608	0.224863	0.170118	0.115373	0.0606285	0.00588346	0.0266698	0.0565506	0.0864314	0.116312	0.146193	0.176074	0.205955	0.235836	0.265717	0.295598	0.325479	0.35536	0.385241	0.415122	0.390781	0.3609	0.331019	0.301139	0.271258	0.241377	0.211496	0.181615	0.151734	0.121853	0.0919719	0.0620909	0.0322098	0.0023287
4	315	2.81471	2.50132	2.18793	1.87454	1.56114	1.24775	0.934357	0.620964	0.30757	0.000914937	0.0501563	0.0993976	0.148639	0.19788	0.247121	0.296362	0.345603	0.394844	0.444085	0.493327	0.542568	0.59181	0.641051	0.68767	0.658273	0.628877	0.59948	0.570084	0.540687	0.511291	0.481894	0.452498	0.423102	0.393705	0.364309	0.334912	0.305516	0.282123	0.377492	0.472862	0.568231	0.663601	0.75897	0.85434	0.949708	1.04508	1.14045	1.23581
4	315	0	0	0	0	0	0	0	0	0	0	0	0	0	0	0	0	0	0	0	0	0	0	0	0	0	0	0	0	0	0	0	0	0	0	0	0	0	0	0	0	0	0	0	0	0	0	0	0
4	315	0	0	0	0	0	0	0	0	0	0	0	0	0	0	0	0	0	0	0	0	0	0	0	0	0	0	0	0	0	0	0	0	0	0	0	0	0	0	0	0	0	0	0	0	0	0	0	0
4	315	0.0362467	0.0387605	0.0412743	0.0437881	0.0463019	0.0488157	0.0513295	0.0538433	0.0563571	0.0588709	0.0613847	0.0625653	0.0604689	0.0583726	0.0562763	0.05418	0.0520836	0.0499873	0.047891	0.0457946	0.0436983	0.041602	0.0395057	0.0374093	0.035313	0.0332015	0.031055	0.0289086	0.0267621	0.0246157	0.0224692	0.0203227	0.0181763	0.0160298	0.0138834	0.0117369	0.00959045	0.007444	0.00529754	0.0115017	0.0355556	0.0596096	0.0836636	0.107718	0.131772	0.155826	0.17988	0.203934
4	315	0.0370198	0.032477	0.0279342	0.0233914	0.0188486	0.0143058	0.00976293	0.00522011	0.000677287	0	0	0	0	0	0	0	0	0	0	0	0	0	0	0.0524674	0.113076	0.173685	0.234293	0.294901	0.355509	0.416118	0.476726	0.537335	0.597943	0.658552	0.719161	0.779769	0.840378	0.794262	0.733653	0.673044	0.612436	0.551827	0.491219	0.430611	0.370003	0.309395	0.248786	0.188178
4	315	0.119908	0.0947042	0.0695007	0.0442972	0.0190938	0	0	0	0	0	0	0	0	0	0	0	0	0	0	0.0137858	0.0673876	0.12099	0.174591	0.228193	0.281795	0.335397	0.388999	0.442601	0.496203	0.549805	0.603408	0.65701	0.710612	0.735058	0.681456	0.627854	0.574252	0.52065	0.467048	0.413446	0.359844	0.306243	0.25264	0.199038	0.145436	0.091834	0.0382319	0
	time(s)=>	0	0.0166618	0.0333237	0.0499855	0.0666473	0.0833093	0.0999712	0.116633	0.133295	0.149957	0.166619	0.183281	0.199943	0.216605	0.233267	0.249929	0.26659	0.283252	0.299914	0.316576	0.333238	0.3499	0.366562	0.383224	0.399886	0.416548	0.43321	0.449872	0.466534	0.483196	0.499857	0.516519	0.533181	0.549843	0.566505	0.583167	0.599829	0.61649	0.633152	0.649814	0.666476	0.683138	0.6998	0.716462	0.733124	0.749786	0.766448	0.78311
neuron	grating direction (deg)
5	0	0	0	0	0	0	0	0	0	0	0	0	0	0	0	0	0	0	0	0	0	0	0	0	0	0	0	0	0	0	0	0	0	0	0	0	0	0	0	0	0	0	0	0	0	0	0	0	0
5	0	0	0	0	0.0245464	0.101182	0.177818	0.254454	0.33109	0.407726	0.484362	0.560999	0.637635	0.714271	0.790907	0.867544	0.89814	0.836397	0.774653	0.712909	0.651165	0.589422	0.527678	0.465934	0.404191	0.342447	0.280703	0.218959	0.183457	0.197754	0.212051	0.226348	0.240645	0.254943	0.26924	0.283537	0.297834	0.312131	0.326428	0.340726	0.342636	0.322286	0.301935	0.281584	0.261233	0.240882	0.220532	0.200181	0.17983
5	0	0.00405513	0.00204367	3.2208e-05	0	0	0	0	0	0	0	0	0	0	0	0	0	0	0	0	0	0	0	0	0	0	0	0.000104963	0.0120565	0.0240081	0.0359597	0.0479114	0.059863	0.0718146	0.0837662	0.0957178	0.107669	0.119621	0.131573	0.143017	0.131066	0.119114	0.107163	0.0952112	0.0832595	0.0713079	0.0593563	0.0474047	0.0354531
5	0	0.0104219	0	0	0	0	0	0	0	0	0	0	0	0	0.016536	0.0747637	0.132992	0.191219	0.249447	0.307675	0.365903	0.424131	0.482359	0.540587	0.598815	0.657043	0.689525	0.660886	0.632247	0.603608	0.574969	0.54633	0.517691	0.489052	0.460414	0.431775	0.403136	0.374497	0.354315	0.353061	0.351808	0.350555	0.349302	0.348049	0.346796	0.345542	0.344289	0.343036	0.341783
5	0	0.59386	0.541869	0.489877	0.437886	0.385895	0.333904	0.281912	0.229921	0.17793	0.125939	0.0739478	0.021957	0.00587654	0.0160493	0.026222	0.0363948	0.0465676	0.0567404	0.0669132	0.077086	0.0872588	0.0974316	0.107604	0.117777	0.115944	0.105771	0.0955983	0.0854256	0.0752529	0.0650801	0.0549073	0.0447345	0.0345617	0.0243889	0.0142161	0.00404328	0.00437554	0.0116374	0.0188992	0.026161	0.0334227	0.0406845	0.0479462	0.055208	0.0624697	0.0697315	0.0769933	0.0842551
5	0	0.959968	1.06144	1.16291	1.26438	1.29412	1.19993	1.10573	1.01153	0.91733	0.823132	0.728933	0.634735	0.540537	0.446339	0.352141	0.257943	0.1938	0.178893	0.163986	0.149078	0.134171	0.119263	0.104356	0.0894484	0.0745409	0.0596335	0.044726	0.0298187	0.038951	0.0854463	0.131942	0.178437	0.224932	0.271427	0.317923	0.364418	0.410913	0.457409	0.503905	0.5504	0.582251	0.592494	0.602736	0.612979	0.623221	0.633464	0.643706	0.653949
5	0	1.42281	1.36883	1.31407	1.25931	1.20454	1.14978	1.09501	1.04025	0.985488	0.930724	0.875961	0.821198	0.766612	0.804707	0.842802	0.880897	0.918993	0.957088	0.995184	1.03328	1.07137	1.10947	1.14757	1.18566	1.22192	1.13272	1.04352	0.954318	0.865116	0.775914	0.686712	0.59751	0.508307	0.419105	0.329903	0.2407	0.154325	0.170315	0.186305	0.202294	0.218284	0.234273	0.250263	0.266252	0.282242	0.298231	0.314221	0.33021
5	45	0.765832	0.661277	0.556722	0.452167	0.347612	0.243057	0.138502	0.0758247	0.0721869	0.0685491	0.0649113	0.0612734	0.0576356	0.0539978	0.05036	0.0467222	0.0430844	0.0394466	0.0358088	0.033793	0.0339502	0.0341074	0.0342646	0.0344218	0.0345789	0.0347361	0.0348933	0.0350505	0.0352077	0.0353649	0.035522	0.0343035	0.0313329	0.0283624	0.0253918	0.0224212	0.0194506	0.0164801	0.0135095	0.0105389	0.00756831	0.00459772	0.00162714	0	0	0	0	0
5	45	0.921024	0.998287	1.07555	1.15281	1.20327	1.20681	1.21036	1.2139	1.21745	1.22099	1.22454	1.22808	1.23163	1.23517	1.23872	1.24226	1.33706	1.58323	1.8294	2.07556	2.32173	2.5679	2.81407	3.06024	3.30641	3.55258	3.79875	4.04492	4.10712	3.87974	3.65236	3.42498	3.1976	2.97022	2.74284	2.51547	2.28809	2.06071	1.83333	1.60595	1.48124	1.50995	1.53866	1.56738	1.59609	1.62481	1.65352	1.68223
5	45	0.563769	0.490042	0.416316	0.342589	0.268862	0.203055	0.251921	0.300786	0.349652	0.398517	0.447383	0.496248	0.545114	0.59398	0.642845	0.691711	0.740576	0.781902	0.732917	0.683932	0.634947	0.585962	0.536978	0.487993	0.439008	0.390023	0.341038	0.292053	0.243068	0.197041	0.181111	0.165181	0.149252	0.133322	0.117392	0.101462	0.0855325	0.0696027	0.053673	0.0377432	0.0218135	0.00744338	0.00681713	0.00619088	0.00556462	0.00493837	0.00431212	0.00368587
5	45	0.0089795	0.0115552	0.0141308	0.0167065	0.0192822	0.0218578	0.0244335	0.0270092	0.0295848	0.0295911	0.0270155	0.0244398	0.0218642	0.0192886	0.0167129	0.0141373	0.0115616	0.00898593	0.00641027	0.00383461	0.00125895	0.0159793	0.047237	0.0784947	0.109752	0.14101	0.172267	0.203525	0.234782	0.26604	0.297297	0.328555	0.359812	0.358334	0.327076	0.295818	0.264561	0.233303	0.202045	0.170788	0.13953	0.108273	0.0770151	0.0457576	0.0145002	0.0448934	0.128633	0.212373
5	45	0.641316	0.590321	0.539327	0.488333	0.437338	0.386344	0.48318	0.777169	1.07116	1.36515	1.65914	1.95312	2.24711	2.5411	2.83509	3.12907	3.42306	3.71705	3.80946	3.64634	3.48321	3.32009	3.15697	2.99384	2.83072	2.6676	2.50448	2.34135	2.17823	2.01511	1.86199	1.72094	1.57988	1.43883	1.29777	1.15672	1.01566	0.874608	0.733553	0.592497	0.451442	0.310387	0.241298	0.254703	0.268108	0.281513	0.294917	0.308322
5	45	0	0	0	0	0	0	0	0	0.0179256	0.0384232	0.0589208	0.0794184	0.0999158	0.120413	0.140911	0.161408	0.181906	0.202403	0.222901	0.243398	0.227533	0.207036	0.186538	0.166041	0.145543	0.125045	0.104548	0.0840504	0.063553	0.0430555	0.022558	0.0020606	0.0392355	0.0828561	0.126477	0.170097	0.213718	0.257339	0.300959	0.34458	0.3882	0.431821	0.475441	0.519061	0.534157	0.546498	0.55884	0.571182
5	90	0.0678922	0.0858466	0.103801	0.121756	0.13971	0.157665	0.175619	0.193574	0.211528	0.200978	0.183024	0.165069	0.147115	0.129161	0.111206	0.0932518	0.0752974	0.0573429	0.0393883	0.0214338	0.00347929	0	0	0	0	0	0	0	0	0	0	0	0	0	0	0	0	0	0	0	0	0	0	0	0	0	0	0
5	90	0.447561	0.505777	0.563994	0.622211	0.680428	0.720628	0.753114	0.7856	0.818086	0.850572	0.883058	0.915544	0.948029	0.980515	1.013	1.04549	1.07797	1.02267	0.931969	0.841266	0.750563	0.65986	0.569157	0.478454	0.387751	0.297048	0.206345	0.115642	0.0249402	0	0	0	0	0	0	0	0	0	0	0	0	0	0	0	0	0	0	0
5	90	0	0	0	0	0	0	0	0	0	0	0.038644	0.0837061	0.128768	0.173831	0.218893	0.263955	0.309018	0.35408	0.399143	0.444205	0.489268	0.53433	0.500986	0.455923	0.410861	0.365799	0.320737	0.275675	0.230612	0.18555	0.140488	0.0954253	0.0503628	0.0053003	0.00634636	0.0135387	0.020731	0.0279233	0.0351157	0.042308	0.0495003	0.0566926	0.0638848	0.0710771	0.0782694	0.0854617	0.0797829	0.0725906
5	90	0.196565	0.20147	0.206375	0.242683	0.295853	0.349023	0.402193	0.455363	0.508533	0.561703	0.614873	0.668042	0.721212	0.774382	0.827552	0.81541	0.770078	0.724745	0.679413	0.634081	0.588748	0.543416	0.498084	0.452751	0.407419	0.362087	0.316755	0.331042	0.373971	0.4169	0.45983	0.502759	0.545689	0.588618	0.631548	0.674477	0.717407	0.760336	0.803266	0.7698	0.701675	0.633549	0.565423	0.497298	0.429172	0.361046	0.29292	0.224795
5	90	0.0646862	0.0816704	0.0986546	0.115639	0.132623	0.149607	0.166591	0.183575	0.200559	0.189653	0.172669	0.155685	0.138701	0.121717	0.104733	0.0877486	0.0707644	0.0537803	0.0367961	0.0198119	0.00282778	0	0	0	0	0	0	0	0	0	0	0	0	0	0	0	0	0	0	0	0	0	0	0	0	0	0	0
5	90	0.0837791	0.0821766	0.080574	0.0789714	0.0773688	0.0757662	0.0706794	0.0643932	0.0581071	0.0518209	0.0455348	0.0392486	0.0329625	0.0266763	0.0203901	0.0141039	0.00781768	0.00153149	0.0412742	0.0958428	0.150411	0.20498	0.259548	0.314117	0.368685	0.423253	0.477821	0.532389	0.586957	0.641526	0.667859	0.685701	0.703544	0.721387	0.739229	0.757072	0.774915	0.792758	0.8106	0.828443	0.846285	0.864128	0.811458	0.739047	0.666636	0.594224	0.521813	0.449402
5	90	0.167447	0.0954204	0.0233936	0	0	0	0	0	0	0	0	0	0	0	0	0.027196	0.0667439	0.106292	0.14584	0.185388	0.224936	0.264484	0.304032	0.34358	0.383127	0.422675	0.462223	0.446392	0.406844	0.367297	0.327749	0.288201	0.248653	0.209105	0.169557	0.130009	0.0904611	0.050913	0.0113652	0	0	0	0	0	0	0	0	0
5	90	0.613459	0.802928	0.992397	1.18186	1.37133	1.5608	1.75027	1.93974	2.1292	2.22384	2.03437	1.8449	1.65543	1.46596	1.27649	1.08703	0.897557	0.708088	0.51862	0.329152	0.139684	0.00551048	0.0264821	0.0474537	0.0684253	0.0893968	0.110368	0.13134	0.152312	0.173283	0.194255	0.215227	0.236199	0.245625	0.224654	0.203682	0.18271	0.161739	0.140767	0.119796	0.0988242	0.0778526	0.0568811	0.0359094	0.0149377	0.0378247	0.169287	0.300749
5	135	0.384983	0.342955	0.300926	0.258898	0.216869	0.174841	0.132812	0.0907835	0.048755	0.00672641	0.108971	0.238706	0.36844	0.498175	0.62791	0.757645	0.887381	1.01712	1.14685	1.27659	1.40632	1.53606	1.44569	1.3172	1.1887	1.06021	0.931716	0.803222	0.674728	0.546234	0.417739	0.289244	0.16075	0.0322549	0.0138019	0.012561	0.0113202	0.0100793	0.00883845	0.00759759	0.00635673	0.00511588	0.00387502	0.00263417	0.00139331	0.000152453	0.0230181	0.0492603
5	135	0.0323856	0.0253608	0.018336	0.0113112	0.00428642	0	0	0	0	0	0	0	0	0	0	0	0	0	0	0	0	0	0	0	0	0	0	0	0	0	0	0	0	0	0	0	0	0	0	0	0	0	0	0	0	0	0	0
5	135	0.368117	0.413907	0.459696	0.505485	0.546526	0.500737	0.454948	0.409159	0.36337	0.317581	0.271791	0.226002	0.180213	0.134423	0.0886338	0.0428444	0.00159906	0.0264618	0.0513245	0.076187	0.10105	0.125912	0.150775	0.175637	0.2005	0.225363	0.250225	0.275088	0.296133	0.27127	0.246408	0.221545	0.196682	0.171819	0.146957	0.122094	0.0972318	0.0723693	0.0475068	0.0226441	0.00483814	0.0590574	0.113277	0.167496	0.221715	0.275935	0.330154	0.384374
5	180	0.0505284	0.1445	0.238471	0.332442	0.426414	0.520385	0.614357	0.708329	0.8023	0.896272	0.990244	1.08422	1.07541	0.982561	0.889712	0.796864	0.704016	0.611168	0.51832	0.425471	0.332623	0.239775	0.146926	0.0540781	0.0128324	0.0117092	0.010586	0.00946285	0.00833966	0.00721647	0.00609328	0.00497008	0.00384689	0.0027237	0.00160051	0.00047732	0	0	0	0	0	0	0	0	0	0	0	0
5	180	0	0	0	0	0	0	0	0	0.0474524	0.150602	0.253751	0.356901	0.46005	0.5632	0.666348	0.769497	0.872646	0.975795	1.07894	1.18209	1.19321	1.10157	1.00993	0.918284	0.826641	0.734998	0.643354	0.551711	0.460067	0.368425	0.276782	0.185139	0.143285	0.154331	0.165376	0.176422	0.187468	0.198514	0.209559	0.220605	0.231651	0.242696	0.253742	0.264788	0.30992	0.389515	0.46911	0.548705
5	180	0.641526	0.558988	0.476451	0.393913	0.311375	0.228837	0.146299	0.0637605	0.0269508	0.0400677	0.0531846	0.0663014	0.0794183	0.0925352	0.105652	0.118769	0.131886	0.145002	0.158119	0.171236	0.188952	0.211446	0.23394	0.256433	0.278927	0.301421	0.323915	0.346409	0.368903	0.391397	0.413891	0.436384	0.455868	0.472377	0.488886	0.505394	0.521903	0.538412	0.554921	0.57143	0.587938	0.604447	0.620956	0.637465	0.637309	0.621477	0.605646	0.589815
5	180	1.22928	1.27004	1.3108	1.35155	1.39231	1.43306	1.47382	1.51458	1.54072	1.4822	1.42368	1.36517	1.30665	1.24813	1.18962	1.1311	1.07258	1.01407	0.955552	0.897036	0.865267	0.974264	1.08326	1.19226	1.30126	1.41025	1.51925	1.62825	1.73725	1.84625	1.95524	2.06424	2.1452	2.09129	2.03738	1.98347	1.92956	1.87565	1.82174	1.76782	1.71391	1.66	1.60609	1.55218	1.49121	1.39906	1.3069	1.21474
5	180	0	0	0	0	0.0208137	0.0511333	0.0814529	0.111772	0.142092	0.172412	0.202731	0.233051	0.26337	0.29369	0.324009	0.354329	0.342267	0.311948	0.281628	0.251308	0.220989	0.190669	0.160349	0.13003	0.0997101	0.0693907	0.0390713	0.00875186	0	0	0	0	0	0	0	0	0	0	0	0	0.0111545	0.0265656	0.0419767	0.0573878	0.0727989	0.0882101	0.103621	0.119033
5	180	0	0	0	0	0	0	0	0	0	0	0	0	0	0	0	0	0	0	0	0	0	0	0	0	0	0.0485065	0.12464	0.200774	0.276907	0.353041	0.429175	0.50531	0.581444	0.657578	0.733712	0.809847	0.885981	0.881788	0.83426	0.786731	0.739204	0.691676	0.644148	0.59662	0.549093	0.501565	0.454037	0.406509
5	180	1.041	0.930742	0.820487	0.710232	0.599978	0.489722	0.379467	0.269211	0.158956	0.0487005	0.00429494	0.011988	0.019681	0.027374	0.035067	0.0427601	0.0504531	0.0581461	0.0658391	0.0735322	0.0812252	0.0889183	0.0878297	0.0801367	0.0724436	0.0647506	0.0570575	0.0493645	0.0416715	0.0339784	0.0262854	0.0185924	0.0108993	0.00320632	0	0	0	0	0	0	0	0	0	0	0	0	0	0
5	180	0.34875	0.315132	0.281514	0.247897	0.214279	0.180661	0.147043	0.113425	0.0798068	0.0461889	0.0125709	0	0	0	0	0	0	0	0	0	0	0	0	0.00872088	0.0223784	0.036036	0.0496936	0.0633511	0.0770087	0.0906662	0.104324	0.117981	0.131639	0.145296	0.158954	0.154828	0.141171	0.127513	0.113856	0.100198	0.0865407	0.0728832	0.0592256	0.045568	0.0319105	0.018253	0.00459554	0.0535826
5	225	0.189039	0.215955	0.24287	0.269786	0.296701	0.321685	0.29477	0.267855	0.240939	0.214024	0.187108	0.160193	0.133278	0.106362	0.0794471	0.0525316	0.0256161	0	0	0	0	0	0	0	0	0	0	0	0	0	0	0	0	0	0	0	0	0	0	0	0	0	0	0	0	0	0	0
5	225	0.484136	0.472159	0.460182	0.448205	0.436227	0.42425	0.412273	0.400296	0.388319	0.376341	0.364364	0.352387	0.330675	0.301706	0.272737	0.243768	0.214799	0.18583	0.156861	0.127892	0.0989223	0.0699531	0.0409838	0.0120146	0	0	0	0	0	0	0	0	0	0	0	0	0	0	0	0	0	0	0	0	0	0	0	0
5	225	0	0	0	0	0	0	0	0	0	0	0	0	0	0	0	0	0	0	0	0	0	0	0	0	0	0.029114	0.0753886	0.121663	0.167937	0.214211	0.260485	0.30676	0.353034	0.399309	0.445583	0.491858	0.538133	0.525032	0.478757	0.432483	0.386208	0.339933	0.293659	0.247385	0.201111	0.154836	0.108562	0.0622876
5	225	0.111132	0.155343	0.199555	0.243767	0.287979	0.33219	0.376402	0.420614	0.464826	0.509037	0.506732	0.46252	0.418309	0.374097	0.329886	0.285674	0.241463	0.197251	0.153039	0.108828	0.064616	0.0204043	0	0	0	0	0	0	0	0	0	0	0	0	0	0	0	0	0	0	0	0	0	0	0	0	0	0
5	225	0	0	0	0	0	0	0	0	0	0	0	0	0	0	0	0	0	0	0	0	0	0	0	0	0	0	0	0	0	0	0	0	0	0	0	0	0	0	0	0	0	0	0	0	0	0	0	0
5	225	0.420888	0.381745	0.342601	0.303458	0.264314	0.225171	0.186027	0.146884	0.10774	0.0685963	0.0294525	0	0	0	0	0	0	0	0	0	0	0	0	0	0	0	0	0	0	0	0	0	0	0	0	0	0	0	0	0	0	0	0	0	0	0	0	0
5	225	1.10557	0.964155	0.822742	0.681329	0.539918	0.398506	0.257094	0.115682	0	0	0	0	0	0	0	0	0	0	0	0	0	0	0	0	0	0	0	0	0	0	0	0	0.0130824	0.0763064	0.13953	0.202753	0.265977	0.3292	0.392424	0.455648	0.518872	0.582096	0.64532	0.708544	0.744027	0.680803	0.617579	0.554355
5	225	0.561106	0.615304	0.629891	0.575694	0.521496	0.467298	0.413101	0.358903	0.304706	0.250508	0.19631	0.142112	0.0879145	0.0337166	0	0	0	0	0	0	0	0	0	0	0	0	0	0	0	0	0	0	0	0	0	0	0	0	0.00464743	0.0161837	0.02772	0.0392564	0.0507928	0.0623292	0.0738656	0.0854019	0.0969383	0.108475
5	270	8.06835	8.94236	9.81638	10.6904	10.5875	9.97337	9.35926	8.74514	8.13103	7.51691	6.9028	6.28868	5.67456	5.06045	4.44634	3.83223	3.4366	3.14912	2.86164	2.57415	2.28667	1.99919	1.7117	1.42422	1.13674	0.849252	0.561769	0.274286	0.282304	0.428534	0.574764	0.720995	0.867225	1.01346	1.15969	1.30592	1.45215	1.59838	1.74461	1.89084	1.82932	1.67607	1.52283	1.36959	1.21634	1.0631	0.909858	0.756615
5	270	0.0288689	0.0239923	0.0191156	0.014239	0.00936239	0.00448578	0.00635085	0.0855916	0.164832	0.244072	0.323313	0.402553	0.481793	0.561034	0.640275	0.719516	0.798757	0.877998	0.946157	0.905652	0.865146	0.824641	0.784136	0.743631	0.703126	0.662621	0.622115	0.58161	0.541105	0.5006	0.46028	0.421545	0.382809	0.344073	0.305338	0.266602	0.227867	0.189131	0.150396	0.111661	0.0729254	0.0341902	0.00166005	0.0158078	0.0299556	0.0441033	0.0582511	0.0723989
5	270	2.62161	2.55667	2.49173	2.42679	2.36185	2.2969	2.23196	2.16702	2.10208	2.03714	1.9722	1.89283	1.76703	1.64123	1.51543	1.38963	1.26383	1.13803	1.01224	0.886437	0.760638	0.63484	0.509041	0.40729	0.377855	0.34842	0.318985	0.28955	0.260115	0.23068	0.201245	0.17181	0.142375	0.11294	0.0835049	0.0604308	0.0552771	0.0501234	0.0449696	0.0398159	0.0346622	0.0295084	0.0243547	0.0192009	0.0140472	0.00889342	0.00373968	0
5	270	0	0	0	0	0	0	0	0	0	0	0	0	0	0	0	0	0	0	0	0	0	0	0	0	0	0	0	0	0	0	0	0	0	0	0	0	0.0476173	0.0988285	0.150039	0.20125	0.252461	0.303672	0.354883	0.406095	0.457306	0.508517	0.559728	0.61094
5	270	0.0487959	0.0318481	0.0388672	0.0996297	0.160393	0.221156	0.281919	0.342682	0.403445	0.464208	0.524971	0.585734	0.646497	0.707259	0.730556	0.674554	0.618552	0.562551	0.506549	0.450547	0.394545	0.338543	0.282541	0.226539	0.170537	0.114534	0.080168	0.0890792	0.0979903	0.106901	0.115812	0.124724	0.133635	0.142546	0.151457	0.160368	0.169279	0.17819	0.187133	0.196137	0.205142	0.214146	0.22315	0.232154	0.241158	0.250163	0.259167	0.268171
5	270	0.773436	0.794952	0.816468	0.749293	0.681164	0.613036	0.544907	0.476778	0.40865	0.340521	0.272393	0.204264	0.136135	0.0680057	0.000114897	0.063611	0.127107	0.190603	0.254099	0.317595	0.381091	0.444586	0.508082	0.571578	0.635073	0.698569	0.761085	0.755832	0.750579	0.745326	0.740073	0.73482	0.729566	0.724313	0.71906	0.713807	0.708554	0.703301	0.698335	0.703826	0.709316	0.714807	0.720297	0.725788	0.731278	0.736769	0.742259	0.74775
5	270	0.167608	0.17394	0.180271	0.186602	0.192934	0.199265	0.205597	0.211928	0.21826	0.224591	0.230922	0.237254	0.238699	0.239802	0.240906	0.242009	0.243113	0.244216	0.24532	0.246423	0.247527	0.24863	0.249734	0.250837	0.231073	0.210143	0.189213	0.168284	0.147354	0.126424	0.105494	0.0845645	0.0636347	0.042705	0.0217752	0.00084544	0.00686841	0.0140259	0.0211835	0.028341	0.0354986	0.0426561	0.0498137	0.0569713	0.0641288	0.0712864	0.078444	0.0856016
5	270	0.28866	0.236188	0.183716	0.131244	0.078772	0.0263	0	0	0	0	0	0	0	0	0	0	0	0	0.0235069	0.0694836	0.11546	0.161437	0.207414	0.253391	0.299368	0.345345	0.391322	0.437299	0.483276	0.529253	0.527066	0.48109	0.435113	0.389136	0.34316	0.297183	0.251206	0.20523	0.159253	0.113276	0.0672989	0.0213219	0.0294403	0.0843406	0.139241	0.194141	0.249041	0.303941
5	315	0.38496	0.35807	0.33118	0.304289	0.277399	0.250509	0.223619	0.196729	0.169839	0.142949	0.118956	0.108888	0.0988204	0.0887525	0.0786845	0.0686166	0.0585486	0.0484806	0.0384127	0.0283447	0.0182768	0.00820887	0.0251222	0.161173	0.297225	0.433276	0.569327	0.705378	0.841431	0.977483	1.11354	1.24959	1.38564	1.52169	1.60411	1.46806	1.33201	1.19596	1.05991	0.923856	0.787805	0.651754	0.515703	0.379651	0.243599	0.107547	0	0
5	315	0.0492157	0.00276951	0	0	0	0	0	0	0	0	0	0	0	0	0.0257011	0.0526765	0.079652	0.106627	0.133603	0.160578	0.187554	0.214529	0.241504	0.26848	0.295455	0.32243	0.297333	0.270358	0.243383	0.216408	0.189432	0.162457	0.135482	0.108506	0.0815308	0.0545554	0.02758	0.000604578	0.0061351	0.0124109	0.0186866	0.0249623	0.031238	0.0375137	0.0437894	0.0500652	0.0563409	0.0626167
5	315	0	0	0	0	0	0	0	0	0	0	0	0	0	0	0	0	0	0	0.0327918	0.0761771	0.119563	0.162948	0.206333	0.249719	0.293104	0.336489	0.379874	0.423259	0.466645	0.51003	0.486755	0.44337	0.399985	0.356599	0.313214	0.269829	0.226443	0.183058	0.139672	0.096287	0.0529019	0.00951678	0.00650505	0.014838	0.0231709	0.0315039	0.0398368	0.0481698
5	315	0.288254	0.241996	0.195739	0.149481	0.103223	0.0569655	0.010708	0	0	0	0	0	0	0	0	0	0	0	0	0	0	0	0	0	0	0	0	0	0	0	0	0	0	0	0	0	0	0	0	0	0	0	0	0.0550127	0.123285	0.191559	0.259832	0.328105
5	315	0.336251	0.321857	0.307463	0.293069	0.278675	0.264281	0.249887	0.235493	0.221099	0.206705	0.191934	0.175652	0.15937	0.143089	0.126807	0.110525	0.094243	0.0779612	0.0616793	0.0453974	0.0291155	0.0128336	0	0	0	0	0	0	0	0	0	0	0	0	0	0	0	0	0	0	0	0	0	0	0	0	0.0190306	0.0994425
5	315	0.839097	0.717112	0.595128	0.473143	0.351158	0.229173	0.107188	0.00793015	0.0733038	0.138678	0.204052	0.269425	0.334799	0.400173	0.465547	0.530921	0.596294	0.661668	0.727042	0.774926	0.709552	0.644179	0.578805	0.513432	0.448058	0.382684	0.31731	0.251936	0.186562	0.121188	0.0558146	0	0	0	0	0	0	0	0	0	0	0	0	0	0	0	0	0
5	315	0.954367	0.89278	0.882551	0.872321	0.862091	0.851862	0.841632	0.831402	0.821173	0.810943	0.800713	0.790483	0.780254	0.815053	0.949556	1.08406	1.21856	1.35307	1.48757	1.62207	1.75658	1.89108	2.02558	2.16009	2.29459	2.36122	2.28597	2.21073	2.13548	2.06023	1.98498	1.90973	1.83448	1.75923	1.68399	1.60874	1.53349	1.44194	1.31818	1.19443	1.07067	0.946916	0.82316	0.699403	0.575647	0.451891	0.328135	0.20438
5	315	1.24233	1.26502	1.2877	1.31039	1.31663	1.20565	1.09468	0.983709	0.872736	0.761764	0.650791	0.539818	0.428845	0.317872	0.206899	0.0959256	0.00607377	0.050866	0.0956583	0.140451	0.185243	0.230034	0.274826	0.319618	0.36441	0.409202	0.453994	0.498786	0.53469	0.519461	0.504231	0.489001	0.473772	0.458542	0.443312	0.428083	0.412853	0.397623	0.382394	0.367164	0.354771	0.357206	0.35964	0.362075	0.36451	0.366945	0.369379	0.371814
	time(s)=>	0	0.0166618	0.0333237	0.0499855	0.0666473	0.0833093	0.0999712	0.116633	0.133295	0.149957	0.166619	0.183281	0.199943	0.216605	0.233267	0.249929	0.26659	0.283252	0.299914	0.316576	0.333238	0.3499	0.366562	0.383224	0.399886	0.416548	0.43321	0.449872	0.466534	0.483196	0.499857	0.516519	0.533181	0.549843	0.566505	0.583167	0.599829	0.61649	0.633152	0.649814	0.666476	0.683138	0.6998	0.716462	0.733124	0.749786	0.766448	0.78311
neuron	grating direction (deg)
6	0	0	0	0	0	0	0	0	0	0	0	0	0	0	0	0	0	0	0	0	0	0	0	0	0	0	0	0	0.00470135	0.154683	0.304663	0.454643	0.604623	0.754603	0.904583	1.05456	1.20454	1.35453	1.50451	1.65449	1.79294	1.64296	1.49298	1.343	1.19302	1.04304	0.893057	0.743077	0.593097
6	0	0	0	0	0	0	0	0	0	0	0	0	0	0	0	0	0	0	0	0	0	0	0	0	0	0	0	0	0	0	0	0	0.00449188	0.0176612	0.0308304	0.0439997	0.0571689	0.0703382	0.0835075	0.0966767	0.109846	0.123015	0.136184	0.149353	0.153354	0.140184	0.127015	0.113846	0.100677
6	0	0.906656	0.973214	1.03977	1.10633	1.13816	1.11165	1.08515	1.05864	1.03214	1.00563	0.979127	0.952623	0.926118	0.899613	0.873108	0.846604	0.803856	0.734634	0.665412	0.59619	0.526968	0.457746	0.388524	0.319302	0.25008	0.180858	0.111637	0.042415	0	0	0	0	0	0	0	0	0	0	0	0	0	0	0	0	0	0	0	0
6	0	2.35216	2.03253	1.71289	1.39326	1.07363	0.753997	0.434366	0.114735	0.15649	0.400611	0.644733	0.888856	1.13298	1.3771	1.62122	1.86535	2.10947	2.35359	2.59771	2.84184	2.76955	2.52543	2.28131	2.03719	1.79307	1.54895	1.30483	1.0607	0.816581	0.572459	0.328336	0.0842139	0	0	0	0	0	0	0	0	0	0	0	0	0.0536211	0.134618	0.215614	0.296611
6	0	0.235936	0.117011	0	0	0	0	0	0	0	0	0	0	0	0	0.000738882	0.0327608	0.0647827	0.0968048	0.128827	0.160849	0.192871	0.224893	0.256915	0.288937	0.320959	0.352981	0.383078	0.351056	0.319034	0.287012	0.25499	0.222968	0.190946	0.158924	0.126902	0.0948798	0.0628578	0.0308358	0.00136077	0.0380948	0.0748288	0.111563	0.148297	0.185031	0.221765	0.258498	0.295232	0.331966
6	45	0.438007	0.498292	0.558577	0.618863	0.679148	0.706828	0.647557	0.588286	0.529015	0.469744	0.410472	0.351201	0.29193	0.232659	0.173388	0.114117	0.0548462	0.0179907	0.0388092	0.0596278	0.0804465	0.101265	0.122084	0.142903	0.163721	0.18454	0.205359	0.226177	0.246996	0.28765	0.377569	0.467489	0.557409	0.647328	0.737248	0.827168	0.917088	1.00701	1.09693	1.18685	1.27677	1.31701	1.23806	1.15912	1.08017	1.00123	0.922283	0.843338
6	45	0.412963	0.438971	0.464979	0.490987	0.516995	0.543003	0.559735	0.555575	0.551415	0.547255	0.543095	0.538935	0.534775	0.530615	0.526455	0.522295	0.518135	0.513975	0.512818	0.518203	0.523589	0.528975	0.534361	0.539746	0.545132	0.550518	0.555903	0.561289	0.566675	0.572061	0.56027	0.512266	0.464261	0.416257	0.368253	0.320248	0.272244	0.224239	0.176235	0.12823	0.0802254	0.0322207	0	0	0	0	0	0
6	45	4.16735	3.99399	3.82063	3.64726	3.4739	3.30054	3.12718	2.95381	2.78045	2.55075	2.31934	2.08792	1.85651	1.62509	1.39368	1.16227	0.930854	0.699441	0.468026	0.236611	0.0051961	0	0	0	0	0	0	0	0	0	0	0	0	0.0479941	0.0967388	0.145484	0.194228	0.242973	0.291718	0.340462	0.389207	0.437952	0.486697	0.535441	0.584185	0.57448	0.564285	0.554089
6	45	0	0	0.0340494	0.0804729	0.126896	0.17332	0.219743	0.266166	0.31259	0.359013	0.405437	0.451861	0.498284	0.544708	0.56349	0.572583	0.581677	0.590771	0.599864	0.608958	0.618052	0.627145	0.636239	0.645333	0.654426	0.66352	0.705184	0.75785	0.810516	0.863183	0.915849	0.968515	1.02118	1.07385	1.12651	1.17918	1.23184	1.28451	1.28624	1.27139	1.25655	1.2417	1.22686	1.21202	1.19717	1.18233	1.16748	1.15264
6	45	0	0	0	0.0214654	0.0511254	0.0807852	0.110445	0.140105	0.169765	0.199425	0.229085	0.258745	0.288405	0.318065	0.347725	0.334038	0.304378	0.274718	0.245058	0.215398	0.185739	0.156079	0.126419	0.096759	0.0670992	0.0374391	0.00777906	0	0	0	0	0	0	0	0	0	0	0	0	0	0	0	0	0	0	0	0	0
6	45	0.813744	0.783432	0.753121	0.722809	0.692497	0.662186	0.631874	0.601562	0.583434	0.571627	0.559821	0.548014	0.536208	0.524401	0.512595	0.500788	0.488982	0.477176	0.465369	0.453563	0.428439	0.396616	0.364794	0.332972	0.30115	0.269328	0.237506	0.205684	0.173861	0.142039	0.110217	0.0783952	0.064159	0.0584916	0.0528241	0.0471567	0.0414893	0.0358218	0.0301544	0.0244869	0.0188195	0.013152	0.00748452	0.00181705	0.0287755	0.0711304	0.113485	0.15584
6	45	3.96213	3.77955	3.61337	3.44719	3.28101	3.11483	2.94865	2.78247	2.61629	2.45011	2.28393	2.11775	1.95158	1.81701	1.73068	1.64435	1.55803	1.4717	1.38538	1.29905	1.21272	1.1264	1.04007	0.953743	0.867416	0.829332	0.862754	0.896175	0.929597	0.963019	0.996441	1.02986	1.06329	1.09671	1.13013	1.16355	1.19697	1.18034	1.09163	1.00291	0.9142	0.825487	0.736775	0.648062	0.55935	0.470637	0.381924	0.293211
6	45	0.0592236	0	0	0	0	0	0	0	0	0	0	0	0	0.00296969	0.0109491	0.0189286	0.0269079	0.0348873	0.0428667	0.0508461	0.0588254	0.0668049	0.0747843	0.0827637	0.0907432	0.107259	0.137755	0.16825	0.198746	0.229241	0.259737	0.290232	0.320727	0.351222	0.381718	0.412213	0.442708	0.446573	0.408098	0.369624	0.331149	0.292674	0.254199	0.215724	0.177249	0.138774	0.100299	0.0618248
6	90	0.510255	0.452291	0.394327	0.336364	0.2784	0.220436	0.162472	0.104508	0.0465445	0	0	0	0	0	0	0	0	0	0	0	0	0.0140396	0.0827972	0.151555	0.220312	0.289069	0.357827	0.426584	0.495341	0.564098	0.632856	0.701613	0.77037	0.822611	0.813229	0.803846	0.794464	0.785081	0.775699	0.766317	0.756934	0.747552	0.738169	0.728787	0.719404	0.703847	0.666213	0.628578
6	90	0.0214172	0.0273829	0.0333485	0.0393141	0.0452796	0.0512452	0.0572108	0.0631763	0.069142	0.0679822	0.0620166	0.0560509	0.0500853	0.0441197	0.0381541	0.0321885	0.0262228	0.0202572	0.0142916	0.00832605	0.00236047	0.0973597	0.258467	0.419575	0.580683	0.741791	0.902899	1.06401	1.22511	1.38622	1.54733	1.70844	1.86955	1.84704	1.70784	1.56865	1.42945	1.29025	1.15106	1.01186	0.872661	0.733464	0.594267	0.455069	0.315872	0.252259	0.235262	0.218265
6	90	0	0	0	0.0248262	0.0897536	0.154681	0.219608	0.284536	0.349463	0.41439	0.479317	0.544245	0.609172	0.674099	0.739026	0.756694	0.700258	0.643822	0.587386	0.53095	0.474515	0.418079	0.361643	0.305207	0.248772	0.192336	0.135901	0.116774	0.154443	0.192113	0.229782	0.267452	0.305121	0.342791	0.380461	0.41813	0.4558	0.49347	0.531139	0.561043	0.579468	0.597893	0.616318	0.634743	0.653168	0.671594	0.690019	0.708444
6	90	0.476338	0.512985	0.469945	0.426905	0.383864	0.340824	0.297783	0.254743	0.211702	0.168662	0.125622	0.082582	0.0395419	0.00508085	0.0675927	0.130105	0.192617	0.255128	0.31764	0.380152	0.442664	0.505176	0.567688	0.6302	0.692712	0.744184	0.681672	0.61916	0.556649	0.494137	0.431625	0.369113	0.306602	0.24409	0.181578	0.119066	0.0565536	0.00211385	0.0242911	0.0464683	0.0686455	0.0908226	0.113	0.135177	0.157354	0.179531	0.201708	0.223886
6	90	1.18706	1.34853	1.50999	1.67145	1.83291	1.87846	1.71699	1.55553	1.39407	1.23261	1.07114	0.90968	0.748218	0.586756	0.425294	0.263833	0.102371	0	0	0	0	0	0	0	0	0	0	0	0	0.0054346	0.0200049	0.0345752	0.0491455	0.0637158	0.0782861	0.0928564	0.107427	0.121997	0.136567	0.151138	0.165708	0.187739	0.221942	0.256144	0.290347	0.32455	0.358753	0.392955
6	90	0	0	0	0	0	0	0	0.00987691	0.0198464	0.0298158	0.0397853	0.0497548	0.0597242	0.0696936	0.0796631	0.0896325	0.0996019	0.109571	0.119541	0.203903	0.288438	0.372972	0.457507	0.542041	0.626576	0.71111	0.795644	0.880179	0.964713	1.04925	1.13298	1.04722	0.961466	0.875708	0.78995	0.704192	0.618434	0.532675	0.446917	0.361159	0.275401	0.189643	0.104786	0.0960401	0.0872943	0.0785486	0.0698029	0.0610571
6	90	1.09204	0.938828	0.785616	0.632404	0.561288	0.531158	0.501029	0.470899	0.44077	0.41064	0.38051	0.350381	0.320251	0.290121	0.259991	0.229862	0.319855	0.467952	0.616048	0.764144	0.91224	1.06034	1.20843	1.35653	1.50463	1.65272	1.80082	1.94892	1.88283	1.71638	1.54994	1.38349	1.21705	1.0506	0.884161	0.717717	0.551274	0.384831	0.218386	0.0519415	0.0677045	0.166121	0.264538	0.362955	0.461372	0.559789	0.658205	0.756622
6	135	0.197571	0.305532	0.413493	0.521454	0.629414	0.737374	0.845334	0.953295	1.06125	1.16922	1.27718	1.20436	1.0964	0.988442	0.880481	0.772519	0.664558	0.556597	0.448636	0.340676	0.232716	0.124756	0.0167961	0	0	0	0	0	0	0	0	0	0	0	0	0	0	0	0	0	0	0	0	0	0	0	0	0
6	135	0.986644	0.952099	0.917553	0.883008	0.848463	0.813917	0.761179	0.699751	0.638323	0.576894	0.515466	0.454038	0.39261	0.331181	0.269753	0.208325	0.146896	0.0854679	0.0622779	0.056771	0.0512641	0.0457572	0.0402504	0.0347435	0.0292367	0.0237298	0.018223	0.0127162	0.00720933	0.0017025	0.0320505	0.0784444	0.124838	0.171232	0.217626	0.26402	0.310414	0.356808	0.403202	0.449595	0.495989	0.542383	0.58464	0.625108	0.665575	0.706042	0.74651	0.786977
6	135	1.10728	1.14696	1.18665	1.17258	1.07159	0.970599	0.869609	0.768619	0.667629	0.566639	0.46565	0.364661	0.263672	0.162683	0.0616933	0.0325676	0.116265	0.199962	0.283659	0.367356	0.451053	0.53475	0.618447	0.702144	0.785841	0.869537	0.953234	0.970617	0.88692	0.803224	0.719527	0.63583	0.552134	0.468437	0.38474	0.301043	0.217346	0.133648	0.0499512	0	0	0	0	0	0	0	0	0
6	135	3.07294	2.90606	2.73918	2.5723	2.40542	2.23854	2.07311	2.074	2.07489	2.07578	2.07667	2.07756	2.07845	2.07935	2.08024	2.08113	2.08202	2.08291	2.08226	1.98466	1.88705	1.78945	1.69185	1.59425	1.49664	1.39904	1.30144	1.20383	1.10623	1.00863	0.91151	0.835363	0.759215	0.683068	0.606921	0.530774	0.454626	0.378479	0.302332	0.226186	0.150039	0.0738921	0.00131961	0.0458867	0.0904538	0.135021	0.179588	0.224155
6	180	0.313849	0.366977	0.420105	0.473232	0.52636	0.579488	0.632615	0.588555	0.535428	0.4823	0.429173	0.376046	0.322918	0.269791	0.216664	0.163536	0.110409	0.0572812	0.00415359	0	0	0	0	0	0	0	0	0	0	0	0	0	0	0	0	0	0	0	0	0	0	0	0	0	0	0	0	0
6	180	0.0201805	0.0181124	0.0160444	0.0139763	0.0119083	0.00984024	0.00777218	0.00570413	0.00363608	0.00156803	0.0265881	0.136556	0.246525	0.356493	0.466461	0.57643	0.686398	0.796366	0.906335	1.0163	1.12627	1.23624	1.3191	1.32016	1.32122	1.32228	1.32334	1.3244	1.32545	1.32651	1.32757	1.32863	1.32969	1.33075	1.30311	1.19208	1.08106	0.97003	0.859002	0.747975	0.636948	0.525921	0.414894	0.303867	0.192841	0.0818144	0.000391003	0.00187709
6	180	0.148941	0.206005	0.26307	0.320135	0.377199	0.434264	0.491328	0.548392	0.605456	0.662521	0.669717	0.64597	0.622224	0.598477	0.57473	0.550983	0.527236	0.503488	0.479741	0.455995	0.432248	0.408501	0.445577	0.519276	0.592976	0.666677	0.740377	0.814077	0.887777	0.961477	1.03518	1.10888	1.18258	1.25628	1.27501	1.26164	1.24826	1.23489	1.22151	1.20813	1.19476	1.18138	1.16801	1.15463	1.14126	1.12788	1.06327	0.969629
6	180	0	0	0	0	0	0	0	0	0	0	0	0	0	0	0	0	0	0	0.0755628	0.18573	0.295896	0.406063	0.51623	0.626397	0.736564	0.846731	0.956898	1.06706	1.17723	1.2874	1.24488	1.13472	1.02455	0.914385	0.804219	0.694052	0.583885	0.473718	0.363552	0.253385	0.143218	0.0330508	0.000582671	0.00141507	0.00224746	0.00307986	0.00391226	0.00474466
6	180	0.28486	0.380998	0.477137	0.573276	0.669415	0.765555	0.861695	0.957834	1.05397	1.15011	1.05974	0.963604	0.867464	0.771324	0.675185	0.579046	0.482907	0.386768	0.290629	0.19449	0.0983501	0.00221058	0	0	0	0	0	0	0	0	0	0	0	0	0.0355105	0.0715972	0.107684	0.143771	0.179858	0.215944	0.252031	0.288118	0.324205	0.360292	0.396379	0.432466	0.397829	0.362554
6	180	0	0	0	0	0	0	0	0	0	0	0	0	0	0	0	0	0	0	0	0	0	0	0	0	0	0	0.00616904	0.0902767	0.174384	0.258492	0.342599	0.426707	0.510814	0.594922	0.679029	0.763137	0.847245	0.931353	1.002	0.918543	0.835088	0.751633	0.668178	0.584723	0.501268	0.417814	0.334359	0.250905
6	180	0.565635	0.444249	0.322863	0.201478	0.0800928	0	0	0	0	0	0	0	0	0	0	0	0	0	0	0	0	0	0	0	0	0	0	0	0	0	0	0	0	0	0	0	0	0	0	0	0	0	0	0	0	0	0	0
6	180	0	0	0	0	0	0.0141218	0.0585587	0.102996	0.147432	0.191869	0.236305	0.280742	0.325178	0.369615	0.414052	0.458488	0.502925	0.518498	0.474061	0.429625	0.385188	0.340751	0.296314	0.251877	0.207441	0.163004	0.118568	0.074131	0.0296944	0	0	0	0	0	0	0	0	0	0	0	0	0.0017701	0.00699544	0.0122208	0.0174461	0.0226715	0.0278968	0.0331221
6	225	0.650878	0.726358	0.801838	0.877318	0.857636	0.782157	0.706677	0.631197	0.555717	0.480238	0.404758	0.329279	0.2538	0.17832	0.10284	0.02736	0.00387315	0.0099485	0.0160238	0.0220992	0.0281745	0.0342498	0.0403252	0.0464005	0.0524758	0.0585511	0.0646264	0.0707017	0.068944	0.0628686	0.0567933	0.0507179	0.0446426	0.0385672	0.0324919	0.0264166	0.0203412	0.0142659	0.00819056	0.00211527	0.00290307	0.00735684	0.0118106	0.0162644	0.0207182	0.025172	0.0296258	0.0340796
6	225	0.0673324	0.0809478	0.0945632	0.108179	0.121794	0.135409	0.149025	0.16264	0.197022	0.232442	0.267861	0.30328	0.338699	0.374118	0.409537	0.444957	0.480376	0.515795	0.551215	0.586634	0.541016	0.491981	0.442947	0.393912	0.344878	0.295843	0.246808	0.197774	0.148739	0.0997049	0.0506704	0.00163596	0	0	0	0	0	0	0	0	0	0	0	0	0	0	0	0
6	225	0.0869983	0.0739674	0.0609365	0.0479057	0.0348749	0.021844	0.00881317	0	0	0	0	0	0	0	0	0	0	0	0	0.0200823	0.0808003	0.141518	0.202237	0.262955	0.323674	0.384392	0.445111	0.505829	0.566548	0.627267	0.687985	0.70768	0.646962	0.586244	0.525526	0.464808	0.40409	0.343371	0.282653	0.221935	0.161216	0.100498	0.039779	0	0	0	0	0
6	225	0.114649	0.100363	0.0860761	0.0717895	0.0575028	0.0432162	0.0289295	0.0146429	0.000356226	0.0243069	0.0492354	0.0741638	0.0990923	0.124021	0.148949	0.173877	0.198806	0.223734	0.248662	0.273591	0.298519	0.398982	0.500822	0.602661	0.704502	0.806342	0.908182	1.01002	1.11186	1.2137	1.31554	1.41738	1.51922	1.4272	1.33305	1.23891	1.14476	1.05061	0.956464	0.862316	0.768169	0.674021	0.579874	0.485726	0.391579	0.386254	0.381268	0.376283
6	225	0.1367	0.160831	0.184962	0.209093	0.233224	0.257355	0.281486	0.292786	0.29782	0.302854	0.307888	0.312923	0.317957	0.322991	0.328025	0.333059	0.338093	0.343127	0.348161	0.36545	0.388535	0.411619	0.434704	0.457789	0.480873	0.503958	0.527042	0.550127	0.573211	0.596296	0.61938	0.590789	0.53854	0.48629	0.43404	0.38179	0.329541	0.277291	0.225041	0.172791	0.120541	0.0682916	0.0160417	0.0459541	0.112268	0.178582	0.244896	0.31121
6	225	0.10475	0.106415	0.0972286	0.0880419	0.0788553	0.0696686	0.060482	0.0512953	0.0421087	0.0329219	0.0237352	0.0145485	0.00536177	0	0	0	0	0	0	0	0	0	0	0	0	0	0	0	0	0	0	0	0	0	0	0	0	0	0	0	0	0	0	0	0	0	0	0
6	225	0	0	0.00188077	0.0497128	0.0975448	0.145377	0.193209	0.241041	0.288873	0.336705	0.384537	0.43237	0.480202	0.528034	0.57193	0.534754	0.497578	0.460402	0.423226	0.38605	0.348874	0.311698	0.274523	0.237347	0.200171	0.162995	0.133443	0.239324	0.345206	0.451087	0.556968	0.662849	0.768729	0.87461	0.98049	1.08637	1.19225	1.29813	1.39181	1.29527	1.19873	1.10219	1.00565	0.909115	0.812576	0.716037	0.619498	0.522959
6	225	0	0	0	0	0	0	0	0	0	0	0	0	0	0	0	0	0	0	0	0	0	0	0	0	0	0	0	0	0	0	0	0	0	0	0	0	0	0	0	0	0	0	0	0	0	0	0	0
6	270	0.811649	0.864398	0.917147	0.969897	1.02265	1.0754	1.12815	1.1809	1.23364	1.28639	1.33914	1.39189	1.40596	1.37755	1.34913	1.32072	1.29231	1.2639	1.23548	1.20707	1.17866	1.15025	1.12184	1.09342	1.03524	0.945285	0.855334	0.765383	0.675433	0.585482	0.495532	0.405581	0.315631	0.22568	0.135729	0.0457784	0	0	0	0	0	0	0	0	0	0	0	0
6	270	1.65895	1.59199	1.52504	1.45809	1.39114	1.29295	1.17884	1.06473	0.950615	0.836503	0.72239	0.608278	0.494166	0.380054	0.265941	0.151828	0.0377153	0.0305673	0.0762249	0.121882	0.16754	0.213197	0.258854	0.304512	0.350169	0.395826	0.441483	0.48714	0.532797	0.59506	0.665261	0.735462	0.805663	0.875863	0.946064	1.01626	1.08647	1.15667	1.22687	1.29707	1.36727	1.31026	1.1944	1.07855	0.96269	0.846832	0.730973	0.615115
6	270	0.158382	0.284435	0.410488	0.53654	0.662593	0.788646	0.9147	1.04075	1.16681	1.29286	1.41891	1.48415	1.37945	1.27474	1.17004	1.06534	0.960635	0.855933	0.75123	0.646528	0.541825	0.437122	0.332419	0.284063	0.387573	0.491083	0.594593	0.698103	0.801613	0.905123	1.00863	1.11214	1.21565	1.31916	1.42267	1.47788	1.40745	1.33703	1.2666	1.19617	1.12574	1.05532	0.984889	0.914461	0.844034	0.773607	0.70318	0.637308
6	270	0.718391	0.64178	0.565168	0.488556	0.411944	0.335332	0.258721	0.182109	0.105498	0.0288863	0	0	0	0	0	0	0	0	0	0	0	0	0	0	0	0	0	0	0	0	0	0	0	0	0.00240445	0.00617883	0.00995321	0.0137276	0.017502	0.0212764	0.0250507	0.0288251	0.0325995	0.0363739	0.0401482	0.0439226	0.0811659	0.136905
6	270	0.663181	0.576817	0.490453	0.404089	0.317726	0.231362	0.144999	0.058635	0	0	0	0	0	0	0	0	0	0	0	0	0.0189552	0.0767308	0.134506	0.192282	0.250057	0.307833	0.365608	0.423383	0.481159	0.538935	0.59671	0.654486	0.673541	0.615765	0.557989	0.500214	0.442438	0.384663	0.326887	0.269112	0.211336	0.153561	0.0957857	0.0380105	0	0	0	0
6	270	0	0	0	0	0	0	0	0	0	0.00205548	0.00872696	0.0153984	0.0220699	0.0287414	0.0354129	0.0420844	0.0487559	0.0554275	0.062099	0.0687705	0.0754421	0.0779092	0.0712376	0.0645661	0.0578946	0.0512231	0.0445516	0.0378802	0.0312087	0.0245372	0.0178657	0.0111942	0.00452265	0.00230453	0.00945931	0.0166141	0.0237689	0.0309236	0.0380784	0.0452332	0.0523879	0.0595427	0.0666974	0.0738521	0.0810068	0.0834523	0.0762976	0.0691428
6	270	0.818687	0.816313	0.813939	0.811564	0.764197	0.696588	0.62898	0.561371	0.493763	0.426154	0.358546	0.290937	0.223329	0.155721	0.088113	0.020505	0	0	0	0	0	0	0	0	0	0	0	0	0.0143801	0.0348146	0.055249	0.0756835	0.0961181	0.116553	0.136987	0.157422	0.177857	0.198291	0.218726	0.239161	0.230549	0.210114	0.18968	0.169245	0.148811	0.128376	0.107942	0.0875071
6	270	4.0519	3.90619	3.76049	3.61478	3.46908	3.32337	3.17767	3.03196	2.88625	2.74055	2.59878	2.50914	2.4195	2.32986	2.24022	2.15058	2.06094	1.9713	1.88166	1.79202	1.70238	1.61274	1.53011	1.53134	1.53256	1.53379	1.53501	1.53624	1.53746	1.53869	1.53991	1.54113	1.54236	1.54358	1.55216	1.64077	1.72937	1.81797	1.90657	1.99517	2.08377	2.17237	2.26098	2.34958	2.43818	2.52678	2.58807	2.37714
6	315	0.182515	0.222638	0.26276	0.302882	0.343004	0.383126	0.423248	0.463371	0.507998	0.556221	0.604444	0.652667	0.70089	0.749113	0.797336	0.845558	0.893781	0.942004	0.990226	1.03845	1.0546	1.04589	1.03717	1.02846	1.01975	1.01103	1.00232	0.993606	0.984893	0.976179	0.967466	0.958752	0.982466	1.03059	1.07872	1.12685	1.17498	1.2231	1.27123	1.31936	1.36749	1.41561	1.46374	1.51187	1.48631	1.40689	1.32746	1.24803
6	315	0.560715	0.609624	0.658533	0.707441	0.75635	0.805258	0.854167	0.903075	0.951983	1.00089	1.0498	1.09871	1.03909	0.965503	0.891917	0.818331	0.744744	0.671158	0.597572	0.523986	0.450401	0.376815	0.30323	0.229644	0.205263	0.18677	0.168278	0.149785	0.131293	0.1128	0.0943074	0.0758148	0.0573222	0.0388296	0.020337	0.00184458	0	0	0	0	0	0	0	0	0	0	0	0
6	315	0.275702	0.206262	0.136822	0.0673827	0	0	0	0	0	0	0	0	0	0	0	0	0.000577584	0.0163199	0.0320622	0.0478046	0.063547	0.0792894	0.0950319	0.110774	0.126517	0.142259	0.158002	0.173744	0.188109	0.172367	0.156624	0.140882	0.12514	0.109397	0.0936549	0.0779125	0.0621701	0.0464277	0.0306852	0.0149428	0.00221799	0.0458831	0.0895482	0.133213	0.176878	0.220543	0.264208	0.307873
6	315	0.295152	0.331938	0.368723	0.405509	0.441223	0.442996	0.444769	0.446542	0.448314	0.450087	0.45186	0.453633	0.455406	0.457179	0.458951	0.460724	0.462036	0.451545	0.441055	0.430565	0.420074	0.409584	0.399094	0.388603	0.378113	0.367623	0.357133	0.346642	0.335367	0.307299	0.279231	0.251162	0.223094	0.195026	0.166958	0.13889	0.110822	0.0827536	0.0546856	0.0266176	0.00407913	0.0830179	0.161957	0.240895	0.319834	0.398773	0.477712	0.556651
6	315	0	0	0	0	0	0.000446733	0.0201508	0.0398549	0.0595589	0.0792629	0.098967	0.118671	0.138375	0.158079	0.177784	0.197488	0.217192	0.235726	0.216022	0.196318	0.176614	0.15691	0.137206	0.117502	0.0977975	0.0780935	0.0583895	0.0386853	0.0189811	0	0	0	0	0	0	0	0	0	0	0	0	0.000370157	0.00884088	0.0173116	0.0257823	0.0342531	0.0427238	0.0511945
6	315	0.37956	0.264218	0.148876	0.0335338	0.0160597	0.0387025	0.0613451	0.0839876	0.10663	0.129273	0.151915	0.174558	0.197201	0.219844	0.242486	0.265129	0.255336	0.232693	0.21005	0.187407	0.164765	0.142122	0.11948	0.0968369	0.0741944	0.0515518	0.028909	0.00626626	0	0	0	0	0	0	0	0	0	0	0	0	0.0406466	0.0963076	0.151968	0.207629	0.26329	0.318951	0.374612	0.430273
6	315	0.474163	0.458015	0.441867	0.425718	0.40957	0.393422	0.377274	0.361126	0.344978	0.32883	0.312682	0.296534	0.282734	0.269737	0.256739	0.243742	0.230745	0.217748	0.20475	0.191753	0.178756	0.165759	0.152761	0.139764	0.12798	0.116594	0.105209	0.0938231	0.0824376	0.0710522	0.0596667	0.0482813	0.0368958	0.0255104	0.014125	0.00273956	0	0	0	0	0	0	0	0	0	0	0	0
6	315	2.99923	3.18924	3.37925	3.56926	3.75927	3.94928	4.13929	3.98257	3.81459	3.64662	3.47865	3.31067	3.1427	2.97473	2.80675	2.63878	2.47081	2.30283	2.13486	2.05502	1.97739	1.89976	1.82213	1.7445	1.66687	1.58923	1.5116	1.43397	1.35634	1.27871	1.20108	1.1109	1.0205	0.930103	0.839704	0.749306	0.658908	0.56851	0.478112	0.387714	0.297315	0.206916	0.116518	0.106036	0.0963996	0.086763	0.0771263	0.0674897
	time(s)=>	0	0.0166618	0.0333237	0.0499855	0.0666473	0.0833093	0.0999712	0.116633	0.133295	0.149957	0.166619	0.183281	0.199943	0.216605	0.233267	0.249929	0.26659	0.283252	0.299914	0.316576	0.333238	0.3499	0.366562	0.383224	0.399886	0.416548	0.43321	0.449872	0.466534	0.483196	0.499857	0.516519	0.533181	0.549843	0.566505	0.583167	0.599829	0.61649	0.633152	0.649814	0.666476	0.683138	0.6998	0.716462	0.733124	0.749786	0.766448	0.78311
neuron	grating direction (deg)
7	0	0.066225	0.0567379	0.0472508	0.0377636	0.0282764	0.0187893	0.00930207	0.000642191	0.0335546	0.066467	0.0993795	0.132292	0.165204	0.198117	0.231029	0.263941	0.296853	0.329765	0.362678	0.395042	0.407365	0.419687	0.43201	0.444332	0.456655	0.468977	0.4813	0.493622	0.505945	0.518267	0.53059	0.546233	0.657094	0.767955	0.878817	0.989679	1.10054	1.2114	1.32227	1.43313	1.54399	1.65485	1.76571	1.86568	1.70959	1.55349	1.3974	1.2413
7	0	0.0578577	0.0687784	0.0796992	0.0906198	0.10154	0.112461	0.123382	0.134302	0.145223	0.156144	0.167064	0.171539	0.162886	0.154234	0.145582	0.136929	0.128277	0.119625	0.110973	0.10232	0.093668	0.0850157	0.0763634	0.0686408	0.0627522	0.0568637	0.0509751	0.0450865	0.0391979	0.0333093	0.0274207	0.021532	0.0156434	0.00975481	0.00386621	0.0090904	0.0355589	0.0620274	0.0884957	0.114964	0.141432	0.167901	0.194369	0.220838	0.247306	0.273775	0.300243	0.308159
7	0	0	0	0	0	0	0	0	0	0	0	0	0	0	0	0	0	0	0	0	0	0.0174328	0.0629997	0.108567	0.154134	0.199701	0.245268	0.290834	0.336401	0.381967	0.427534	0.473101	0.518667	0.52873	0.483163	0.437596	0.39203	0.346463	0.300896	0.255329	0.209762	0.164195	0.118628	0.0730615	0.0274948	0	0	0	0
7	0	0	0	0	0	0	0	0	0	0	0	0	0	0.00999518	0.025531	0.0410668	0.0566026	0.0721384	0.0876743	0.10321	0.118746	0.134282	0.149817	0.165353	0.180889	0.184306	0.181208	0.17811	0.175012	0.171915	0.168817	0.165719	0.162621	0.159523	0.156425	0.153328	0.15023	0.140992	0.128554	0.116116	0.103678	0.0912405	0.0788025	0.0663645	0.0539266	0.0414886	0.0290506	0.0166126	0.00417465
7	0	0	0	0	0	0	0	0	0	0	0	0	0	0	0	0	0	0	0	0	0	0	0	0	0	0	0	0	0	0	0	0	0	0	0	0	0	0	0	0	0	0	0	0	0	0	0	0	0
7	45	0.429244	0.498273	0.567301	0.636329	0.705357	0.774386	0.843415	0.912444	0.981472	1.04082	1.07468	1.10853	1.14239	1.17624	1.21009	1.24395	1.2778	1.31166	1.34551	1.37936	1.41322	1.43166	1.41089	1.39013	1.36937	1.34861	1.32785	1.30708	1.28632	1.26556	1.2448	1.22404	1.20327	1.15984	1.06074	0.961635	0.862533	0.76343	0.664327	0.565225	0.466122	0.367019	0.267916	0.168813	0.0697106	0.00688666	0.0301069	0.0533272
7	45	0.428529	0.384306	0.340083	0.29586	0.251637	0.207414	0.16319	0.118967	0.0747435	0.0305201	0.0144566	0.0611105	0.107764	0.154418	0.201072	0.247726	0.29438	0.341033	0.387687	0.434341	0.480994	0.527648	0.554105	0.537036	0.519967	0.502898	0.485829	0.46876	0.451691	0.434622	0.417553	0.400484	0.383415	0.366347	0.345222	0.315637	0.286052	0.256467	0.226882	0.197297	0.167712	0.138127	0.108542	0.078957	0.0493719	0.0197869	0	0
7	45	1.59064	1.74548	1.90111	2.05673	2.21235	2.36797	2.5236	2.67922	2.83484	2.99046	3.14609	3.30171	3.45733	3.4816	3.5022	3.5228	3.5434	3.56401	3.58461	3.60521	3.62581	3.64641	3.66701	3.68762	3.70822	3.53199	3.35172	3.17145	2.99119	2.81092	2.63066	2.45039	2.27013	2.08986	1.9096	1.72933	1.54906	1.69219	1.8396	1.987	2.1344	2.2818	2.4292	2.5766	2.724	2.8714	3.0188	3.16621
7	45	0	0	0	0	0	0	0.00909062	0.0214456	0.0338005	0.0461555	0.0585105	0.0708655	0.0832205	0.0955755	0.107931	0.120286	0.13264	0.144995	0.138995	0.12664	0.114285	0.10193	0.0895756	0.0772207	0.0648656	0.0525106	0.0401556	0.0278006	0.0154456	0.00309062	0	0	0	0	0	0	0	0	0	0	0	0	0	0	0	0	0	0
7	45	0	0	0	0	0	0	0	0.0498226	0.118445	0.187067	0.255689	0.324312	0.392934	0.461557	0.53018	0.598802	0.667424	0.736047	0.804669	0.794973	0.756759	0.718544	0.68033	0.642115	0.603901	0.565686	0.527471	0.489257	0.451042	0.412827	0.374613	0.348889	0.327553	0.306216	0.28488	0.263543	0.242207	0.22087	0.199534	0.178198	0.156861	0.135525	0.114188	0.120269	0.135633	0.150997	0.166361	0.181725
7	45	0.27086	0.246973	0.223087	0.1992	0.175313	0.151426	0.127539	0.103652	0.0797654	0.0558785	0.0319915	0.00810463	0.0149184	0.0374977	0.060077	0.0826562	0.105235	0.127815	0.150394	0.172973	0.195552	0.218132	0.240711	0.26329	0.259386	0.242301	0.225216	0.208131	0.191046	0.173962	0.156877	0.139792	0.122707	0.105622	0.0885375	0.0714528	0.0875787	0.119716	0.151854	0.183992	0.21613	0.248268	0.280406	0.312544	0.344681	0.376819	0.408957	0.441095
7	45	0.562035	0.622003	0.68197	0.741937	0.801904	0.811064	0.741155	0.671247	0.601338	0.531429	0.461521	0.391613	0.321705	0.251797	0.181889	0.111981	0.0420723	0.00399974	0.0140448	0.0240898	0.0341348	0.0441799	0.0542249	0.0642699	0.074315	0.0843599	0.0944049	0.10445	0.114495	0.1164	0.106355	0.0963099	0.0862649	0.0762198	0.0661748	0.0561298	0.0460848	0.0360397	0.0259947	0.0159497	0.0059047	0.0269389	0.0922972	0.157655	0.223014	0.288372	0.353731	0.419089
7	45	0.682225	0.774912	0.867598	0.960284	1.05297	1.19844	1.43477	1.67111	1.90744	2.14377	2.3801	2.61643	2.85276	3.08909	3.32542	3.56175	3.79808	3.83049	3.5223	3.21411	2.90592	2.59773	2.28954	1.98135	1.67316	1.36497	1.05678	0.748584	0.440393	0.279453	0.357259	0.435065	0.51287	0.590676	0.668481	0.746287	0.824093	0.901899	0.979705	1.05751	1.13532	1.19174	1.21452	1.23729	1.26006	1.28283	1.3056	1.32837
7	90	0.502617	0.546848	0.634136	0.721424	0.808712	0.896	0.983288	1.07058	1.15786	1.24515	1.33244	1.41973	1.50702	1.55982	1.4742	1.38857	1.30294	1.21732	1.13169	1.04606	0.960434	0.874807	0.789179	0.703552	0.617925	0.540513	0.494654	0.448794	0.402934	0.357075	0.311215	0.265356	0.219496	0.173636	0.127776	0.0819163	0.0360563	0	0	0	0	0	0	0	0	0	0	0
7	90	0.285179	0.346432	0.432884	0.519336	0.605787	0.692238	0.77869	0.865141	0.951593	1.03805	1.1245	1.21095	1.2974	1.26862	1.16287	1.05712	0.951379	0.845634	0.739889	0.634145	0.5284	0.422656	0.316911	0.211166	0.105421	0.0606005	0.0552782	0.0499559	0.0446336	0.0393114	0.0339891	0.0286668	0.0233445	0.0180222	0.0127	0.00737776	0.00205552	0	0	0	0	0	0	0	0	0	0	0
7	90	0.477938	0.45891	0.439882	0.420854	0.401826	0.382799	0.363771	0.341442	0.313835	0.286227	0.25862	0.231012	0.203405	0.175798	0.14819	0.120583	0.092975	0.0653674	0.0377598	0.0202831	0.0185348	0.0167864	0.015038	0.0132896	0.0115413	0.00979292	0.00804457	0.00629621	0.00454785	0.00279948	0.0010511	0.00740675	0.0259789	0.044551	0.0631232	0.0816954	0.100268	0.11884	0.137412	0.155984	0.174556	0.193128	0.2117	0.219393	0.211161	0.202928	0.194696	0.186464
7	90	0.808844	0.923256	1.03767	1.15208	1.26649	1.37663	1.43531	1.49399	1.55266	1.61134	1.67002	1.72869	1.78737	1.84605	1.90472	1.9634	2.02208	2.06348	1.91555	1.76762	1.6197	1.47177	1.32385	1.17592	1.02799	0.880068	0.732142	0.584217	0.436291	0.299491	0.274329	0.249167	0.224004	0.198842	0.17368	0.148517	0.123355	0.0981923	0.0730298	0.0478675	0.0227052	0	0	0	0	0	0	0
7	90	0.262175	0.249946	0.237716	0.225487	0.213257	0.201027	0.188798	0.176568	0.164338	0.151812	0.13876	0.125709	0.112657	0.0996055	0.0865539	0.0735024	0.0604508	0.0473993	0.0343477	0.0212962	0.0082446	0	0	0	0	0	0	0	0	0	0	0	0	0.013047	0.0478093	0.0825716	0.117334	0.152096	0.186859	0.221621	0.256384	0.291146	0.325909	0.360671	0.395434	0.412613	0.401387	0.39016
7	90	1.12181	1.00971	0.897607	0.785504	0.6734	0.561296	0.449193	0.337089	0.224985	0.112882	0.000779079	0	0	0	0	0	0	0	0	0	0	0	4.38913e-06	0.12189	0.243775	0.365661	0.487546	0.609432	0.731317	0.853202	0.975087	1.09697	1.21886	1.34074	1.46189	1.4783	1.49471	1.51113	1.52754	1.54395	1.56036	1.57678	1.59319	1.6096	1.62602	1.64243	1.65694	1.53788
7	90	2.39558	2.82906	3.26253	3.69601	4.12948	4.56296	4.99643	5.42991	5.35019	5.01693	4.68366	4.35039	4.01713	3.68386	3.3506	3.01733	2.68406	2.3508	2.01753	1.68427	1.61483	1.67167	1.7285	1.78534	1.84217	1.89901	1.95584	2.01268	2.06951	2.12635	2.18318	2.24002	2.13743	1.96096	1.78449	1.60802	1.43154	1.25507	1.07859	0.902121	0.725646	0.549172	0.372697	0.196223	0.253712	0.41618	0.578649	0.741117
7	135	0	0	0	0	0	0	0	0	0	0	0	0	0	0	0	0.0184089	0.0403338	0.0622588	0.0841838	0.106108	0.128033	0.149958	0.171883	0.193807	0.215732	0.237657	0.259582	0.244374	0.222449	0.200524	0.178599	0.156674	0.134749	0.112824	0.0908997	0.0689749	0.0470501	0.0251254	0.00320059	0.0812839	0.176462	0.27164	0.366818	0.461995	0.557173	0.652351	0.74753	0.842708
7	135	0.546166	0.591358	0.63655	0.681742	0.726934	0.772126	0.817318	0.862509	0.907701	0.952893	0.955	0.936747	0.918494	0.900241	0.881987	0.863734	0.845481	0.827228	0.808974	0.790721	0.772468	0.754214	0.872425	1.05306	1.23369	1.41432	1.59495	1.77558	1.95621	2.13684	2.31747	2.4981	2.67873	2.85936	2.80773	2.6533	2.49888	2.34445	2.19002	2.03559	1.88117	1.72674	1.57231	1.41789	1.26346	1.10903	1.06067	1.0577
7	135	0.904067	1.0129	1.12173	1.23056	1.33939	1.44822	1.55705	1.57198	1.43657	1.30115	1.16573	1.03032	0.894903	0.759487	0.624071	0.488655	0.353239	0.217822	0.0824058	0	0	0	0	0	0	0	0	0	0	0	0	0	0	0	0	0	0	0	0	0	0	0	0	0	0	0	0	0
7	135	0.076585	0.114803	0.15302	0.191238	0.229455	0.267673	0.305891	0.344108	0.382326	0.420543	0.458429	0.466391	0.474352	0.482313	0.490275	0.498236	0.506198	0.514159	0.52212	0.530082	0.538043	0.546005	0.552994	0.506815	0.460637	0.414458	0.368279	0.322101	0.275922	0.229743	0.183564	0.137385	0.0912056	0.0450267	0	0	0	0	0	0	0	0	0	0	0	0	0.00123053	0.0397462
7	180	0.596064	0.716901	0.837738	0.958574	1.07941	1.20025	1.32108	1.44192	1.56276	1.68359	1.80443	1.67571	1.52441	1.37312	1.22182	1.07053	0.919235	0.76794	0.616645	0.46535	0.314055	0.162761	0.0114659	0.0376363	0.0783588	0.119081	0.159804	0.200526	0.241248	0.28197	0.322693	0.363415	0.404138	0.44486	0.485583	0.45045	0.409727	0.369005	0.328282	0.28756	0.246837	0.206115	0.165393	0.12467	0.0839481	0.0432259	0.00250328	0
7	180	1.46545	1.6087	1.68843	1.56365	1.43888	1.31411	1.18934	1.06457	0.939793	0.815021	0.69025	0.565478	0.440706	0.315935	0.224558	0.23657	0.248582	0.260594	0.272606	0.284618	0.29663	0.308642	0.320654	0.332666	0.344678	0.35669	0.362138	0.348025	0.333912	0.3198	0.305687	0.291574	0.277461	0.263349	0.249236	0.235123	0.22101	0.206897	0.192199	0.17582	0.159441	0.143062	0.126683	0.110304	0.0939251	0.0775462	0.0611674	0.0447886
7	180	0.394453	0.431647	0.423286	0.386092	0.348899	0.311705	0.274511	0.237317	0.200124	0.16293	0.125736	0.0885419	0.051348	0.0141541	0.0558186	0.145928	0.236037	0.326147	0.416256	0.506364	0.596473	0.686581	0.77669	0.866798	0.956907	1.04702	1.05501	1.01405	0.973096	0.932138	0.891181	0.850223	0.809266	0.768308	0.727351	0.686394	0.645436	0.604479	0.603153	0.624748	0.646342	0.667936	0.68953	0.711125	0.732719	0.754313	0.775907	0.797502
7	180	0.651933	0.581975	0.512016	0.442057	0.372097	0.302138	0.232179	0.16222	0.0922607	0.0223015	0.0118022	0.0291273	0.0464522	0.0637771	0.081102	0.0984269	0.115752	0.133077	0.150402	0.167727	0.185052	0.202377	0.257971	0.330898	0.403826	0.476754	0.549682	0.622609	0.695536	0.768463	0.841391	0.914318	0.987245	1.06017	1.01964	0.929392	0.839139	0.748886	0.658633	0.568381	0.478128	0.387875	0.297623	0.20737	0.117118	0.026866	0.0229851	0.0557125
7	180	1.99425	2.14141	2.06745	1.98555	1.90364	1.82174	1.73984	1.65793	1.57603	1.49412	1.41222	1.33032	1.24841	1.16651	1.06985	0.972773	0.875696	0.77862	0.681543	0.584467	0.48739	0.390313	0.293236	0.196159	0.0990815	0.00200418	0	0	0	0	0	0	0	0	0	0	0	0	0	0	0	0	0	0	0	0	0	0
7	180	0.0476989	0.0542165	0.0607341	0.0672517	0.0737694	0.080287	0.0896544	0.142376	0.195098	0.24782	0.300542	0.353264	0.405986	0.458707	0.511429	0.564151	0.616873	0.669595	0.714581	0.654655	0.594729	0.534802	0.474876	0.414949	0.355023	0.295096	0.23517	0.175244	0.115317	0.055391	0	0	0	0	0	0	0	0	0	0	0	0	0.00085866	0.0112437	0.0216287	0.0320136	0.0423986	0.0527836
7	180	0.419558	0.435536	0.451513	0.46749	0.483468	0.499445	0.515422	0.531399	0.547377	0.590829	0.687025	0.783222	0.879418	0.975615	1.07181	1.16801	1.2642	1.3604	1.4566	1.55279	1.64899	1.66169	1.51898	1.37626	1.23355	1.09083	0.948121	0.805407	0.662693	0.519979	0.377265	0.234551	0.0918371	0	0	0	0	0	0	0	0	0	0	0	0	0.0275536	0.10336	0.179167
7	180	0.189188	0.167392	0.145595	0.123799	0.102003	0.0802069	0.0584107	0.0366145	0.0148183	0.0149078	0.061475	0.108042	0.154609	0.201177	0.247744	0.294311	0.340879	0.387446	0.434014	0.480581	0.527149	0.551353	0.529556	0.507758	0.485961	0.464163	0.442366	0.420569	0.398771	0.376974	0.355176	0.333379	0.311581	0.319035	0.384796	0.450556	0.516316	0.582076	0.647836	0.713596	0.779356	0.845115	0.910875	0.976635	1.04239	1.05485	0.964319	0.873789
7	225	0.0593219	0.0512698	0.0432176	0.0351655	0.0271134	0.0190613	0.0110092	0.00295708	0.00631013	0.0162825	0.0262549	0.0362273	0.0461997	0.0561721	0.0661446	0.076117	0.0860895	0.0960619	0.106034	0.116007	0.113216	0.103244	0.0932715	0.083299	0.0733266	0.0633543	0.0533819	0.0434095	0.0334371	0.0234647	0.0134922	0.00351977	0	0	0	0	0	0	0	0	0	0	0	0	0	0	0	0
7	225	0.580853	0.528264	0.475675	0.423087	0.370498	0.317909	0.26532	0.212731	0.160143	0.107554	0.0549653	0.00237665	0.116743	0.239011	0.361279	0.483548	0.605816	0.728085	0.850354	0.972623	1.09489	1.21716	1.33943	1.4617	1.34874	1.22647	1.10421	0.981937	0.859669	0.7374	0.615132	0.492864	0.370595	0.248326	0.126057	0.00378833	0.0291521	0.0592364	0.0893206	0.119405	0.149489	0.179573	0.209657	0.239741	0.269825	0.299909	0.329993	0.360078
7	225	0.0369597	0.064981	0.0930021	0.121023	0.149044	0.177065	0.205087	0.233108	0.261129	0.289151	0.317172	0.332134	0.320099	0.308065	0.29603	0.283996	0.271962	0.259927	0.247893	0.235859	0.223824	0.21179	0.199756	0.186405	0.170418	0.154431	0.138444	0.122457	0.10647	0.0904832	0.0744963	0.0585093	0.0425225	0.0265357	0.0105488	0.0192809	0.0759637	0.132647	0.18933	0.246013	0.302696	0.359379	0.416063	0.472746	0.529429	0.586113	0.642796	0.66628
7	225	3.75612	3.53498	3.31081	3.08663	2.86245	2.63828	2.4141	2.18992	1.96575	1.74157	1.51739	1.29322	1.06904	0.99157	0.917491	0.843412	0.769333	0.695254	0.621175	0.547095	0.473016	0.398936	0.324856	0.250777	0.176697	0.262887	0.351607	0.440328	0.529049	0.617769	0.706489	0.795209	0.883929	0.972649	1.06137	1.15009	1.23881	1.2544	1.26936	1.28432	1.29928	1.31424	1.3292	1.34416	1.35912	1.37409	1.38905	1.40401
7	225	0	0	0	0	0	0	0	0	0	0	0	0	0	0	0	0	0	0	0	0	0	0	0	0	0	0	0	0	0	0	0	0	0	0	0	0.020101	0.0493054	0.0785098	0.107714	0.136919	0.166123	0.195328	0.224532	0.253736	0.282941	0.312145	0.341349	0.365829
7	225	0.392137	0.306672	0.221208	0.135743	0.0502789	0	0	0	0	0	0	0	0	0	0	0	0	0.0220757	0.0747998	0.127523	0.180247	0.232971	0.285694	0.338418	0.391142	0.443866	0.49659	0.549314	0.602038	0.609874	0.55715	0.504426	0.451702	0.398977	0.346254	0.29353	0.240806	0.188083	0.135359	0.0826352	0.0299112	0.0404364	0.133891	0.227346	0.320801	0.414257	0.507712	0.601167
7	225	0.228361	0.266203	0.304044	0.341886	0.379727	0.417568	0.452258	0.414417	0.376575	0.338734	0.300892	0.26305	0.225209	0.187367	0.149525	0.111684	0.0738423	0.0360008	0	0	0	0	0	0	0	0	0	0	0	0	0.000501183	0.00950895	0.0185167	0.0275245	0.0365322	0.04554	0.0545478	0.0635556	0.0725633	0.0815711	0.0905789	0.0995867	0.111395	0.165126	0.218857	0.272587	0.326318	0.380049
7	225	0.226991	0.157858	0.088726	0.0195934	0.0727969	0.174386	0.275975	0.377563	0.479152	0.580741	0.682329	0.783918	0.885506	0.987095	1.08868	1.19027	1.18917	1.14883	1.10849	1.06816	1.02782	0.987481	0.947143	0.906805	0.866467	0.82613	0.785792	0.745454	0.796895	0.882189	0.967484	1.05278	1.13807	1.22337	1.30866	1.39396	1.47925	1.56455	1.64984	1.73514	1.69549	1.61137	1.52725	1.44313	1.35902	1.2749	1.19078	1.10666
7	270	0	0	0	0	0.049491	0.154387	0.259283	0.364178	0.469074	0.57397	0.678865	0.78376	0.888656	0.993551	1.09845	1.20334	1.22125	1.14457	1.06789	0.991206	0.914523	0.83784	0.761157	0.684474	0.607791	0.531109	0.454426	0.377744	0.32953	0.311395	0.293259	0.275123	0.256987	0.238851	0.220715	0.202579	0.184443	0.166307	0.148171	0.130034	0.134204	0.161269	0.188333	0.215397	0.242462	0.269526	0.29659	0.323654
7	270	0.296238	0.377229	0.458221	0.539212	0.620203	0.701194	0.782185	0.863176	0.944167	0.917479	0.836488	0.755497	0.674506	0.593515	0.512524	0.431533	0.350541	0.26955	0.188558	0.107567	0.0265758	0.000771042	0.00191865	0.00306626	0.00421387	0.00536148	0.00650909	0.00765669	0.0088043	0.00995191	0.0110995	0.0122471	0.0133948	0.012984	0.0118364	0.0106888	0.00954117	0.00839356	0.00724595	0.00609833	0.00495073	0.00380312	0.00265552	0.00150791	0.000360303	0.0412794	0.10145	0.16162
7	270	0	0	0	0.000386625	0.00188039	0.00337416	0.00486794	0.00636171	0.00785548	0.00934925	0.010843	0.0123368	0.0138306	0.0153243	0.0168181	0.0371602	0.109538	0.181915	0.254293	0.32667	0.399048	0.471426	0.543803	0.616181	0.688559	0.760937	0.833314	0.865768	0.791897	0.718025	0.644154	0.570283	0.496412	0.422541	0.34867	0.274798	0.200927	0.127055	0.0531835	0	0	0	0	0	0	0	0	0
7	270	0.718895	0.701815	0.757286	0.857553	0.95782	1.05809	1.15835	1.25862	1.35889	1.45915	1.55942	1.65969	1.75995	1.86022	1.81514	1.68297	1.5508	1.41862	1.28645	1.15428	1.0221	0.88993	0.757757	0.625584	0.493411	0.361238	0.337927	0.37791	0.417894	0.457877	0.49786	0.537844	0.577827	0.617811	0.657794	0.697778	0.737761	0.777744	0.766922	0.727446	0.687971	0.648495	0.609019	0.569543	0.530067	0.490591	0.451115	0.411639
7	270	0.22891	0.209305	0.189701	0.170097	0.150493	0.130889	0.111285	0.0916806	0.0720764	0.0524724	0.0328683	0.0132642	0.0457218	0.187103	0.328484	0.469866	0.611247	0.752629	0.894011	1.03539	1.17677	1.31815	1.45954	1.60092	1.64887	1.50749	1.36611	1.22473	1.08334	0.941963	0.800581	0.659199	0.517817	0.376436	0.235054	0.0936728	0	0	0	0	0	0	0	0	0	0	0	0
7	270	1.56331	1.61773	1.47933	1.34094	1.20255	1.06416	0.925772	0.787381	0.648991	0.5106	0.372211	0.233821	0.0954312	0.0357911	0.151091	0.266392	0.381692	0.496993	0.612294	0.727595	0.842895	0.958196	1.0735	1.1888	1.3041	1.3462	1.2309	1.1156	1.0003	0.884997	0.769696	0.654395	0.539095	0.423794	0.308493	0.193193	0.0778919	0	0	0	0	0	0	0	0	0	0	0
7	270	0.120971	0.146792	0.172612	0.198433	0.224253	0.250074	0.275895	0.301715	0.291797	0.265976	0.240156	0.214335	0.188515	0.162694	0.136874	0.111053	0.0852329	0.0594122	0.0335915	0.00777077	0	0	0	0	0	0	0	0	0	0	0	0	0.00480987	0.0116224	0.018435	0.0252475	0.03206	0.0388726	0.0456852	0.0524977	0.0593103	0.0661228	0.0729353	0.0797478	0.0768451	0.0700326	0.0632202	0.0564076
7	270	0.391689	0.430629	0.464462	0.425521	0.386581	0.34764	0.3087	0.269759	0.230818	0.191877	0.152937	0.113996	0.0750551	0.0361144	0.00478054	0.0706505	0.13652	0.20239	0.26826	0.334131	0.400001	0.465871	0.531741	0.597611	0.663482	0.729352	0.784742	0.718872	0.653002	0.587132	0.521262	0.455392	0.389521	0.323651	0.257781	0.191911	0.126041	0.060171	0	0	0	0	0	0	0	0	0	0
7	315	0.554359	0.505907	0.457456	0.409004	0.360553	0.312101	0.26365	0.215198	0.166746	0.118294	0.0698423	0.0213905	0.0170898	0.0476882	0.0782866	0.108885	0.139483	0.170081	0.20068	0.231278	0.261876	0.292474	0.323072	0.353671	0.349651	0.319052	0.288454	0.257856	0.227257	0.196659	0.166061	0.135462	0.104864	0.0742659	0.0436677	0.0130696	0	0	0	0	0	0	0	0	0	0	0	0
7	315	0	0	0	0	0.0603759	0.128886	0.197396	0.265906	0.334416	0.402926	0.471437	0.539947	0.608458	0.676969	0.745479	0.81399	0.760775	0.692264	0.623754	0.555243	0.486733	0.418223	0.349712	0.281202	0.212692	0.144182	0.075671	0.00716036	0	0	0	0	0	0	0	0	0	0	0	0	0	0	0	0	0	0	0	0
7	315	0.301785	0.263911	0.226036	0.188162	0.150287	0.112413	0.0745382	0.0366635	0.00187733	0.0605882	0.119299	0.17801	0.236721	0.295433	0.354144	0.412854	0.471565	0.530275	0.588986	0.647696	0.701824	0.643113	0.584403	0.525692	0.466981	0.40827	0.349559	0.290848	0.232137	0.173426	0.114715	0.0560045	0	0	0	0	0	0	0	0	0	0	0	0	0	0	0	0
7	315	1.75136	2.11596	2.48057	2.84518	3.20979	3.57439	3.939	4.30361	4.65542	4.63141	4.6074	4.58339	4.55939	4.53538	4.51137	4.48736	4.46335	4.43934	4.41534	4.39133	4.35372	3.98948	3.62525	3.26101	2.89678	2.53254	2.1683	1.80407	1.43983	1.07559	0.711354	0.347117	0.00232125	0.0517053	0.101089	0.150473	0.199857	0.249241	0.298625	0.348008	0.397392	0.446776	0.49616	0.545544	0.595623	0.657874	0.720125	0.782376
7	315	0.904402	0.842707	0.781013	0.719318	0.657624	0.595929	0.534234	0.47254	0.410845	0.351088	0.366878	0.382668	0.398459	0.414249	0.430039	0.44583	0.46162	0.47741	0.493201	0.508991	0.524781	0.544818	0.693217	0.841615	0.990013	1.13841	1.28681	1.43521	1.58361	1.73201	1.88041	2.02881	2.17721	2.31652	2.23222	2.14792	2.06362	1.97932	1.89502	1.81072	1.72642	1.64212	1.55782	1.47352	1.38922	1.30754	1.28015	1.25277
7	315	0.56276	0.682379	0.801999	0.921618	1.04124	1.16086	1.28048	1.4001	1.47987	1.5435	1.60712	1.67075	1.73438	1.798	1.86163	1.92526	1.98888	2.05251	2.11614	2.17976	2.072	1.89711	1.72223	1.54734	1.37246	1.19758	1.02269	0.847807	0.672922	0.498036	0.323151	0.148266	0.094211	0.0858495	0.0774881	0.0691267	0.0607654	0.0524041	0.0440427	0.0356814	0.02732	0.0189587	0.0105973	0.00223587	0.0207436	0.0490587	0.0773738	0.105689
7	315	0.418125	0.289837	0.161549	0.0332615	0.211308	0.496578	0.781848	1.06712	1.35239	1.63766	1.92293	2.2082	2.49347	2.77874	3.06401	3.34929	3.20795	2.92267	2.6374	2.35214	2.06687	1.7816	1.49633	1.21106	0.925786	0.640515	0.355243	0.0699717	0.00857831	0.0199445	0.0313107	0.0426769	0.0540431	0.0654093	0.0767754	0.0881416	0.0995077	0.110874	0.12224	0.133606	0.159438	0.189796	0.220154	0.250512	0.280869	0.311227	0.341585	0.371943
7	315	0	0	0	0	0	0	0	0	0	0	0	0	0	0	0	0	0	0	0	0	0	0	0	0	0	0	0	0	0	0	0	0	0	0	0	0	0	0	0	0	0	0	0	0	0	0	0	0
	time(s)=>	0	0.0166618	0.0333237	0.0499855	0.0666473	0.0833093	0.0999712	0.116633	0.133295	0.149957	0.166619	0.183281	0.199943	0.216605	0.233267	0.249929	0.26659	0.283252	0.299914	0.316576	0.333238	0.3499	0.366562	0.383224	0.399886	0.416548	0.43321	0.449872	0.466534	0.483196	0.499857	0.516519	0.533181	0.549843	0.566505	0.583167	0.599829	0.61649	0.633152	0.649814	0.666476	0.683138	0.6998	0.716462	0.733124	0.749786	0.766448	0.78311
neuron	grating direction (deg)
8	0	0.238879	0.190927	0.142976	0.0950248	0.047073	0.00644731	0.358279	0.71011	1.06194	1.41377	1.76561	2.11744	2.46927	2.8211	3.17293	3.52476	3.87659	4.21649	4.09921	3.98192	3.86463	3.74734	3.63005	3.51277	3.39548	3.27819	3.1609	3.04361	2.92632	2.8089	2.68738	2.56585	2.44433	2.32281	2.20129	2.07976	1.95824	1.83672	1.7152	1.59367	1.47215	1.35945	1.46076	1.56207	1.66337	1.76468	1.86599	1.96729
8	0	0.649038	0.621769	0.594501	0.567232	0.539964	0.512695	0.485427	0.458158	0.43089	0.422539	0.452913	0.483288	0.513663	0.544038	0.574413	0.604789	0.635164	0.665539	0.695914	0.726289	0.756664	0.755141	0.690365	0.62559	0.560814	0.496038	0.431262	0.366486	0.30171	0.236934	0.172158	0.107382	0.0426054	0	0	0	0	0	0	0	0	0	0	0	0	0	0	0
8	0	0	0	0	0	0	0	0	0	0	0	0	0	0	0	0	0	0	0	0.0356702	0.129193	0.222716	0.316239	0.409762	0.503285	0.596808	0.690331	0.783854	0.877376	0.970898	1.06442	1.11533	1.09914	1.08296	1.06677	1.05059	1.0344	1.01822	1.00203	0.985844	0.969658	0.953473	0.937287	0.898248	0.824269	0.75029	0.676311	0.602332	0.528353
8	0	0.478111	0.591041	0.703971	0.8169	0.92983	1.04276	1.15569	1.26862	1.38155	1.49447	1.45269	1.32471	1.19673	1.06875	0.940765	0.812783	0.684802	0.55682	0.428838	0.300856	0.172876	0.0448949	0	0	0	0	0	0	0	0	0	0	0	0	0	0	0	0	0	0	0	0	0	0	0	0	0	0
8	0	0.0183235	0.020611	0.0228985	0.025186	0.0287607	0.105622	0.182483	0.259344	0.336204	0.413065	0.489926	0.566787	0.643647	0.720508	0.797369	0.874229	0.952456	1.08567	1.21889	1.35211	1.48532	1.61854	1.75176	1.88497	2.01819	2.1514	2.28462	2.41784	2.54533	2.49523	2.44513	2.39503	2.34493	2.29484	2.24474	2.19464	2.14454	2.09444	2.04434	1.99424	1.95036	2.06301	2.17566	2.28831	2.40096	2.51361	2.62626	2.73891
8	45	0.739179	0.629282	0.519385	0.409488	0.299591	0.189693	0.0797957	0	0	0	0	0	0	0	0	0	0	0	0	0	0	0	0	0	0	0	0	0	0	0	0	0	0	0	0	0	0	0	0	0	0	0	0	0.0214932	0.0942564	0.167019	0.239782	0.312545
8	45	0.977115	1.20427	1.43142	1.65857	1.88572	2.11287	2.34002	2.56717	2.65409	2.42694	2.19979	1.97263	1.74548	1.51833	1.29118	1.06403	0.836875	0.609724	0.382574	0.155423	0.0381378	0.158916	0.279694	0.400472	0.52125	0.642028	0.762806	0.883585	1.00436	1.12514	1.24592	1.3667	1.52145	1.74744	1.97344	2.19944	2.42543	2.65143	2.87743	3.10342	3.32942	3.55542	3.78142	4.00741	4.15693	4.15116	4.1454	4.13963
8	45	0	0	0	0	0	0	0	0	0	0	0	0	0	0	0	0	0	0	0	0	0	0	0	0	0	0	0	0	0	0	0	0	0	0	0	0.0266015	0.0535867	0.0805719	0.107557	0.134542	0.161527	0.188513	0.215498	0.242483	0.269468	0.296453	0.323438	0.296839
8	45	0.918569	1.00637	1.09417	1.18197	1.31476	1.4638	1.61284	1.76189	1.91093	2.05997	2.20902	2.35806	2.5071	2.65615	2.80519	2.95423	2.84901	2.65521	2.46142	2.26762	2.07383	1.88003	1.68624	1.49245	1.29865	1.10485	0.911058	0.717262	0.710556	0.766655	0.822753	0.878852	0.934951	0.99105	1.04715	1.10325	1.15934	1.21544	1.27154	1.32764	1.28245	1.20451	1.12657	1.04863	0.970686	0.892746	0.814806	0.736865
8	45	0.260095	0.293795	0.327496	0.361196	0.394897	0.403905	0.403541	0.403178	0.402814	0.402451	0.402087	0.401724	0.40136	0.400997	0.400633	0.40027	0.399907	0.408303	0.419908	0.431513	0.443118	0.454723	0.466328	0.477932	0.489537	0.501142	0.512747	0.524352	0.535957	0.50578	0.460838	0.415896	0.370954	0.326012	0.28107	0.236128	0.191187	0.146245	0.101303	0.0563618	0.0114198	0.050573	0.118374	0.186176	0.253977	0.321778	0.38958	0.457381
8	45	1.41651	1.37773	1.33894	1.30016	1.26138	1.22259	1.18381	1.14503	1.10624	1.06746	1.26556	1.58595	1.90633	2.22672	2.5471	2.86749	3.18787	3.50825	3.82864	4.14902	4.46941	4.78979	4.65534	4.29333	3.93133	3.56932	3.20731	2.8453	2.4833	2.12129	1.75928	1.39728	1.03527	0.673264	0.594188	0.652244	0.710299	0.768355	0.82641	0.884466	0.942522	1.00058	1.05863	1.11669	1.17474	1.2328	1.24746	1.24176
8	45	0.774224	0.807516	0.840808	0.83311	0.761308	0.689507	0.617705	0.545904	0.474102	0.4023	0.330499	0.258698	0.186897	0.115096	0.0432955	0.0456443	0.160614	0.275584	0.390553	0.505523	0.620493	0.735463	0.850432	0.965402	1.08037	1.19534	1.31031	1.34804	1.27183	1.19563	1.11942	1.04321	0.967004	0.890796	0.814589	0.738381	0.662173	0.585966	0.509758	0.448941	0.410179	0.371417	0.332656	0.293894	0.255132	0.21637	0.177608	0.138846
8	45	0	0	0	0.00964648	0.0359783	0.0623102	0.0886422	0.114974	0.141306	0.167638	0.19397	0.220303	0.246635	0.272967	0.299299	0.305969	0.279637	0.253306	0.226974	0.200642	0.17431	0.147978	0.121646	0.0953138	0.0689818	0.0426497	0.0163177	0.0133373	0.0484065	0.0834758	0.118545	0.153614	0.188683	0.223752	0.258821	0.29389	0.328959	0.364028	0.399097	0.407003	0.371934	0.336865	0.301796	0.266726	0.231657	0.196588	0.161519	0.12645
8	90	0.77388	0.774539	0.775197	0.775856	0.776515	0.777174	0.777832	0.778491	0.77915	0.779809	0.780468	0.768089	0.702967	0.637845	0.572723	0.507601	0.442479	0.377358	0.312235	0.247113	0.181991	0.116869	0.0517465	0	0	0	0	0	0	0	0	0	0	0	0	0.0127155	0.0725341	0.132353	0.192171	0.25199	0.311808	0.371627	0.431446	0.491264	0.551082	0.6109	0.670718	0.704246
8	90	0.237521	0.386784	0.536047	0.685308	0.83457	0.983832	1.13309	1.28235	1.43162	1.58088	1.73014	1.80756	1.83675	1.86595	1.89515	1.92434	1.95354	1.98274	2.01193	2.04113	2.07032	2.09952	2.12872	2.03218	1.85372	1.67526	1.4968	1.31834	1.13988	0.961425	0.782966	0.604507	0.426047	0.24759	0.0691323	0.063835	0.168036	0.272238	0.37644	0.480642	0.584844	0.689046	0.793248	0.89745	1.00165	1.10585	1.21006	1.18511
8	90	0	0	0	0	0	0.0332457	0.119926	0.206606	0.293286	0.379966	0.466646	0.553326	0.640006	0.726686	0.813366	0.900046	0.986727	1.03919	1.03827	1.03734	1.03642	1.0355	1.03458	1.03365	1.03273	1.03181	1.03089	1.02996	1.02904	1.01852	0.993456	0.968393	0.94333	0.918267	0.893205	0.868142	0.843079	0.818016	0.792953	0.76789	0.742828	0.703345	0.642651	0.581957	0.521262	0.460567	0.399872	0.339177
8	90	0	0	0	0.00216939	0.0309277	0.0596859	0.0884442	0.117202	0.145961	0.174719	0.203477	0.232235	0.260993	0.289751	0.318509	0.342525	0.313767	0.285009	0.256251	0.227492	0.198734	0.169976	0.141218	0.112459	0.0837014	0.0549433	0.0261852	0	0	0	0	0	0	0	0	0	0	0	0	0	0	0	0	0	0	0	0	0
8	90	0.613964	0.64986	0.685757	0.721653	0.75755	0.793446	0.829343	0.826718	0.75565	0.684582	0.613515	0.542447	0.47138	0.400312	0.329245	0.258178	0.18711	0.116043	0.0449756	0	0	0	0	0	0	0	0	0	0	0	0	0.0195429	0.0717747	0.124007	0.176238	0.22847	0.280702	0.332934	0.385166	0.437398	0.48963	0.541862	0.594095	0.606508	0.554276	0.502044	0.449812	0.397581
8	90	0.457694	0.400541	0.343387	0.286234	0.22908	0.171926	0.114772	0.0576177	0.000463753	0	0	0	0	0	0	0	0	0	0	0	0	0.0834005	0.166896	0.250391	0.333886	0.417381	0.500876	0.584371	0.667866	0.751361	0.834855	0.91835	1.0013	0.991404	0.98151	0.971617	0.961723	0.951829	0.941935	0.932041	0.922148	0.912254	0.90236	0.892466	0.882227	0.84548	0.808732	0.771984
8	90	0.496735	0.541051	0.585366	0.629682	0.673997	0.718313	0.715462	0.689185	0.662908	0.636632	0.610355	0.584078	0.557801	0.531524	0.505248	0.478971	0.452694	0.426417	0.394357	0.359513	0.32467	0.289826	0.254983	0.220139	0.185295	0.150451	0.115607	0.0807634	0.0459196	0.0110758	0	0	0	0	0	0	0	0	0	0	0	0	0.0360779	0.0884324	0.140787	0.193142	0.245496	0.297851
8	135	0.27905	0.295934	0.313582	0.331231	0.348879	0.366528	0.384177	0.401825	0.419474	0.437122	0.454771	0.47242	0.490068	0.723976	0.99956	1.27514	1.55073	1.82631	2.1019	2.37748	2.65306	2.92864	3.20422	3.4798	3.75539	3.69794	3.57971	3.46147	3.34323	3.22499	3.10675	2.98851	2.87027	2.75204	2.6338	2.51556	2.39732	2.38615	2.39346	2.40076	2.40806	2.41537	2.42267	2.42998	2.43728	2.44459	2.45189	2.4592
8	135	0.944504	1.14672	1.34893	1.55115	1.75336	1.95557	2.15779	2.36	2.42643	2.42835	2.43026	2.43218	2.4341	2.43602	2.43794	2.43985	2.44177	2.44369	2.44561	2.44752	2.46426	2.4878	2.51135	2.5349	2.55844	2.58199	2.60554	2.62908	2.65263	2.67618	2.69972	2.72327	2.59825	2.40712	2.21598	2.02484	1.83371	1.64257	1.45144	1.2603	1.06916	0.87803	0.686896	0.495761	0.435075	0.430539	0.426002	0.421466
8	135	0.0621183	0.0486633	0.0352083	0.0217532	0.00829819	0.0616644	0.222556	0.383449	0.544341	0.705233	0.866124	1.02701	1.18791	1.3488	1.50969	1.67058	1.83147	1.86678	1.70588	1.54499	1.3841	1.22321	1.06232	0.901423	0.740531	0.57964	0.418749	0.257857	0.0969663	0	0	0	0	0	0	0	0	0	0	0	0	0.0558009	0.193799	0.331797	0.469795	0.607793	0.745791	0.883789
8	135	0.253713	0.317098	0.380483	0.443867	0.507252	0.570637	0.634022	0.697407	0.759858	0.727858	0.695858	0.663858	0.631858	0.599858	0.567857	0.535857	0.503857	0.471857	0.439856	0.407856	0.375866	0.344482	0.313097	0.281713	0.250329	0.218944	0.18756	0.156176	0.124792	0.0934071	0.0620226	0.0306381	0.000782207	0.0336733	0.0665644	0.0994554	0.132347	0.165238	0.198128	0.231019	0.26391	0.296801	0.329692	0.362583	0.394326	0.389923	0.38552	0.381117
8	180	0.264079	0.231412	0.198746	0.16608	0.133414	0.100747	0.0680811	0.0354149	0.00274866	0.0858445	0.179576	0.273307	0.367038	0.460769	0.5545	0.648232	0.741963	0.835695	0.929427	1.02316	1.11689	1.10513	1.08457	1.06402	1.04346	1.0229	1.00234	0.981786	0.961229	0.940672	0.920114	0.899557	0.878999	0.809499	0.736325	0.663151	0.589977	0.516802	0.443628	0.370454	0.29728	0.224106	0.150933	0.077759	0.00458543	0	0	0
8	180	0.0814298	0.177611	0.273793	0.369974	0.466157	0.562339	0.658521	0.754703	0.850885	0.947067	1.04325	1.13943	1.18768	1.0866	0.985524	0.884444	0.783364	0.682284	0.581204	0.480124	0.379044	0.277963	0.176883	0.0758024	0	0	0	0	0	0	0	0	0	0	0	0	0	0	0	0	0	0	0	0	0	0	0	0
8	180	0.719352	0.656149	0.592947	0.529744	0.466542	0.40334	0.340138	0.276936	0.213734	0.150531	0.0873287	0.0241262	0.290781	0.761094	1.23141	1.70172	2.17204	2.64235	3.11267	3.58298	4.05329	4.5236	4.99391	5.46421	5.51473	5.31373	5.11273	4.91172	4.71072	4.50972	4.30872	4.10771	3.90671	3.70571	3.50471	3.30371	3.11328	2.92901	2.74473	2.56045	2.37618	2.1919	2.00762	1.82335	1.63907	1.45479	1.27052	1.08624
8	180	0.378359	0.32667	0.274982	0.223293	0.171604	0.119916	0.068227	0.0165383	0.023233	0.057397	0.0915611	0.125725	0.159889	0.194053	0.228216	0.26238	0.296544	0.330708	0.364872	0.399036	0.463121	0.540834	0.618547	0.69626	0.773973	0.851686	0.929399	1.00711	1.08482	1.16254	1.24025	1.31796	1.28165	1.19509	1.10853	1.02197	0.935415	0.848856	0.762297	0.675738	0.589179	0.50262	0.416061	0.329503	0.285884	0.260566	0.235249	0.209931
8	180	0.0508182	0.103526	0.156233	0.20894	0.261648	0.314355	0.367063	0.419771	0.472479	0.525187	0.577894	0.630602	0.580934	0.528226	0.475518	0.422811	0.370103	0.317396	0.264688	0.211981	0.159273	0.106566	0.0538578	0.0011501	0	0	0	0	0	0	0	0	0	0	0	0	0	0	0	0	0	0	0	0	0	0	0	0
8	180	0.316427	0.236106	0.155784	0.0754621	0	0	0	0	0	0	0	0	0	0	0	0	0.00127381	0.0201436	0.0390135	0.0578833	0.0767533	0.0956232	0.114493	0.133363	0.152233	0.171103	0.189973	0.208843	0.226847	0.234101	0.241355	0.24861	0.255864	0.263118	0.270373	0.277627	0.284881	0.292136	0.29939	0.306644	0.311178	0.285053	0.258929	0.232805	0.206681	0.180557	0.154433	0.128309
8	180	0.202513	0.1721	0.141686	0.111273	0.0808593	0.0504458	0.0200324	0	0	0	0	0	0	0	0	0	0	0	0	0.0329941	0.127714	0.222434	0.317154	0.411874	0.506594	0.601315	0.696035	0.790755	0.885476	0.980196	1.07492	1.15349	1.20278	1.25207	1.30136	1.35064	1.39993	1.44922	1.4985	1.54779	1.59708	1.64637	1.69565	1.67491	1.5309	1.38689	1.24289	1.09888
8	180	0.511667	0.435082	0.358497	0.281912	0.205327	0.128742	0.0521569	0	0	0	0	0	0	0	0	0	0	0	0	0	0	0	0	0	0	0	0	0	0	0	0	0	0	0	0	0	0	0	0	0	0	0	0	0	0	0	0	0
8	225	0.14201	0.163448	0.184885	0.206323	0.22776	0.249198	0.282939	0.323858	0.364777	0.405696	0.446615	0.487534	0.528452	0.569371	0.61029	0.651209	0.692129	0.733048	0.708003	0.645647	0.58329	0.520934	0.458577	0.396221	0.333864	0.271508	0.209152	0.146796	0.0844401	0.0220834	0.0670921	0.170974	0.274855	0.378737	0.482618	0.586499	0.69038	0.794262	0.898143	1.00202	1.1059	1.20978	1.178	1.07412	0.970234	0.866353	0.762471	0.65859
8	225	0	0	0	0	0	0	0	0	0	0	0.0705695	0.144571	0.218572	0.292573	0.366575	0.440576	0.514577	0.588579	0.662581	0.736582	0.810584	0.884586	1.13948	1.40178	1.66407	1.92636	2.18865	2.45094	2.71323	2.97552	3.23782	3.50011	3.7624	4.02469	4.05221	4.07192	4.09163	4.11134	4.13105	4.15076	4.17047	4.19018	4.20989	4.2296	4.24931	4.26902	4.07178	3.86896
8	225	0.640187	0.566391	0.492596	0.418801	0.345005	0.27121	0.197415	0.123619	0.0498229	0	0	0	0	0	0	0	0	0	0	0	0	0.0215336	0.0864117	0.15129	0.216168	0.281046	0.345924	0.410802	0.475681	0.540559	0.605437	0.670315	0.735193	0.781751	0.792585	0.80342	0.814255	0.82509	0.835925	0.84676	0.857595	0.868429	0.879264	0.890099	0.900934	0.888437	0.831849	0.775261
8	225	0.892452	0.974483	1.05651	1.13854	1.22058	1.30261	1.38464	1.46667	1.5487	1.63073	1.71276	1.57513	1.43215	1.28918	1.1462	1.00323	0.86025	0.717275	0.574299	0.431322	0.288345	0.145369	0.0023918	0.210745	0.425077	0.639408	0.85374	1.06807	1.2824	1.49673	1.71106	1.92539	2.13972	2.35405	2.56838	2.75984	2.95108	3.14233	3.33357	3.52481	3.71605	3.90729	4.09853	4.28977	4.48101	4.67225	4.86349	4.64384
8	225	0	0	0	0	0	0	0	0	0	0.125994	0.313181	0.500367	0.687553	0.874738	1.06192	1.24911	1.43629	1.62348	1.81066	1.99785	2.18503	2.35055	2.50588	2.66121	2.81653	2.97186	3.12719	3.28251	3.43784	3.59317	3.74849	3.90382	4.05914	3.93197	3.67615	3.42034	3.16453	2.90871	2.6529	2.39708	2.14127	1.88545	1.62964	1.37382	1.11801	1.07195	1.1183	1.16466
8	225	0.805991	0.688775	0.571558	0.485263	0.443367	0.401471	0.359575	0.317679	0.275782	0.233886	0.191989	0.150093	0.108196	0.0663	0.0244035	0	0	0	0	0	0	0	0	0	0	0	0	0.00196896	0.00660703	0.0112451	0.0158832	0.0205213	0.0251594	0.0297975	0.0344355	0.0390736	0.0437116	0.0483497	0.0529877	0.053623	0.0489849	0.0443468	0.0397087	0.0350707	0.0304326	0.0257945	0.0211564	0.0165183
8	225	0	0	0	0	0.00160752	0.0413204	0.0810333	0.120746	0.160459	0.200172	0.239885	0.279598	0.319311	0.359024	0.398738	0.438451	0.483089	0.626545	0.770001	0.913457	1.05691	1.20037	1.34382	1.48728	1.63074	1.77419	1.91765	2.06111	2.20077	2.27457	2.34837	2.42217	2.49598	2.56978	2.64358	2.71738	2.79118	2.86499	2.93879	3.01259	3.06744	2.83291	2.59837	2.36383	2.12929	1.89476	1.66022	1.42568
8	225	0.338489	0.295428	0.266281	0.24267	0.219058	0.195447	0.171835	0.148224	0.124612	0.101001	0.0773892	0.0537777	0.0301663	0.00655485	0	0	0	0	0	0	0	0	0	0	0	0	0.000444034	0.00105282	0.0016616	0.00227039	0.00287918	0.00348797	0.00409676	0.00470555	0.00531434	0.00592313	0.00653192	0.00714071	0.00685292	0.00624413	0.00563534	0.00502656	0.00441778	0.00380899	0.0032002	0.00259141	0.00198262	0.00137383
8	270	0.577066	0.596692	0.649471	0.739543	0.829616	0.919689	1.00976	1.09984	1.18991	1.27998	1.37005	1.46013	1.5502	1.64027	1.62007	1.47938	1.33869	1.198	1.0573	0.916609	0.775915	0.635221	0.494528	0.353834	0.21314	0.0724468	0.00346525	0.010609	0.0177528	0.0248966	0.0320404	0.0391841	0.0463279	0.0534717	0.0606155	0.0677593	0.0749031	0.0820469	0.0821571	0.0750133	0.0678695	0.0607257	0.0535819	0.0464381	0.0392944	0.0321506	0.0250068	0.0178631
8	270	0.938409	0.939661	0.940912	0.942163	0.943414	0.944665	0.945916	0.942226	0.936031	0.929835	0.92364	0.917444	0.911249	0.905054	0.898858	0.892663	0.886468	0.880272	0.874077	0.880082	0.892078	0.904074	0.91607	0.928066	0.940062	0.952057	0.964053	0.976049	0.988045	1.00004	1.01204	1.1235	1.28226	1.44102	1.59978	1.75854	1.9173	2.07606	2.23482	2.39357	2.55233	2.71109	2.86985	2.88767	2.84064	2.79362	2.74659	2.69956
8	270	0	0.00924304	0.0451177	0.0809923	0.116867	0.152742	0.188616	0.224491	0.260366	0.296241	0.332115	0.36799	0.403864	0.425275	0.406511	0.387747	0.368983	0.350219	0.331455	0.312692	0.293928	0.275164	0.2564	0.237636	0.218872	0.200557	0.183447	0.166336	0.149225	0.132114	0.115004	0.0978929	0.0807822	0.0636715	0.0465608	0.02945	0.0123391	0	0	0	0	0	0	0	0	0	0	0
8	270	0	0	0	0	0	0	0	0	0	0	0	0	0	0	0	0	0	0	0	0	0	0	0	0	0.0681815	0.176206	0.28423	0.392255	0.500279	0.608303	0.716328	0.824353	0.932378	1.0404	1.14843	1.25645	1.22764	1.12126	1.01488	0.908506	0.802128	0.69575	0.589372	0.482994	0.376616	0.270238	0.163859	0.0574805
8	270	0.450646	0.645293	0.839939	1.03459	1.22923	1.42388	1.61852	1.81317	2.00782	2.20246	2.35335	2.41219	2.47103	2.52988	2.58872	2.64756	2.7064	2.76525	2.82409	2.88293	2.94178	3.00062	3.00496	2.89829	2.79162	2.68495	2.57827	2.4716	2.36493	2.25825	2.15158	2.04491	1.93823	1.83156	1.71139	1.56457	1.41775	1.27094	1.12412	0.977308	0.830493	0.683678	0.536864	0.390049	0.243233	0.096417	0.0248455	0.0972226
8	270	1.12226	1.01729	0.912312	0.807336	0.702361	0.597386	0.492411	0.387435	0.28246	0.177485	0.0725103	0.0203202	0.0860264	0.151733	0.217439	0.283146	0.348852	0.414559	0.480266	0.545972	0.611679	0.677386	0.743092	0.776266	0.73911	0.701955	0.664799	0.627643	0.590488	0.553332	0.516176	0.47902	0.441864	0.404708	0.367552	0.333178	0.304627	0.276077	0.247526	0.218975	0.190425	0.161874	0.133324	0.104773	0.0762226	0.0476719	0.0191213	0.0148631
8	270	0.0768056	0.0882967	0.0997878	0.111279	0.12277	0.134261	0.16579	0.206283	0.246777	0.28727	0.327764	0.368257	0.40875	0.449244	0.489737	0.53023	0.570723	0.611217	0.587172	0.535187	0.483202	0.431218	0.379233	0.327248	0.275264	0.223279	0.171295	0.11931	0.0673261	0.0153418	0.0396004	0.0957812	0.151962	0.208144	0.264325	0.320506	0.376687	0.432869	0.48905	0.545231	0.601413	0.657594	0.633786	0.577605	0.521424	0.465244	0.409063	0.352882
8	270	0.982146	1.02665	1.07116	1.11566	1.16017	1.20467	1.24918	1.29368	1.33819	1.3827	1.4272	1.47171	1.50402	1.37786	1.25171	1.12555	0.999388	0.873229	0.747069	0.62091	0.49475	0.368591	0.242431	0.116272	0.0277422	0.381691	0.735639	1.08959	1.44354	1.79748	2.15143	2.50538	2.85932	3.21327	3.56722	3.92116	4.21469	3.86074	3.50679	3.15284	2.7989	2.44495	2.091	1.73705	1.3831	1.02916	0.675209	0.321262
8	315	0.137896	0.191969	0.246042	0.300116	0.354189	0.408262	0.462335	0.516409	0.570482	0.624556	0.921229	1.4106	1.89997	2.38934	2.87871	3.36808	3.85745	4.34682	4.83619	5.32556	5.81492	6.30429	6.34248	6.03258	5.72268	5.41277	5.10287	4.79297	4.48307	4.17316	3.86326	3.55336	3.24346	2.93356	2.80747	2.8191	2.83073	2.84236	2.85399	2.86562	2.87725	2.88888	2.90051	2.91214	2.92377	2.9354	2.97563	3.03667
8	315	1.68376	1.60286	1.58855	1.58332	1.57809	1.57286	1.56763	1.5624	1.55717	1.55194	1.54671	1.54148	1.53625	1.53102	1.54561	1.56273	1.57985	1.59696	1.61408	1.63119	1.64831	1.66543	1.68254	1.69966	1.71677	1.73389	1.63525	1.52293	1.41062	1.2983	1.18598	1.07366	0.961337	0.849017	0.736698	0.624379	0.51206	0.399742	0.398066	0.408489	0.418912	0.429334	0.439757	0.45018	0.460603	0.471026	0.481449	0.491872
8	315	0.115428	0.13459	0.153752	0.172914	0.192076	0.211238	0.22922	0.210058	0.190895	0.171733	0.152571	0.133409	0.114247	0.0950847	0.0759225	0.0567606	0.0375986	0.0184366	0.00156179	0.0428185	0.0840755	0.125333	0.16659	0.207847	0.249104	0.290361	0.331618	0.372875	0.414132	0.455389	0.494295	0.483221	0.472146	0.461072	0.449998	0.438924	0.427849	0.416775	0.405701	0.394626	0.383552	0.372478	0.36041	0.330227	0.300045	0.269862	0.23968	0.209497
8	315	0.132365	0.154335	0.176305	0.198275	0.220245	0.242215	0.26279	0.24082	0.21885	0.196879	0.174909	0.152939	0.130969	0.108999	0.0870283	0.0650581	0.0430879	0.0211177	0.00235048	0.0629253	0.1235	0.184075	0.244649	0.305224	0.365798	0.426373	0.486948	0.547523	0.608097	0.668672	0.728611	0.775292	0.821973	0.868654	0.915335	0.962016	1.0087	1.05538	1.10206	1.14874	1.19542	1.2421	1.28065	1.17339	1.06613	0.958878	0.851621	0.744365
8	315	0.168698	0.182999	0.1973	0.211601	0.225902	0.240203	0.254504	0.273969	0.504862	0.735756	0.966649	1.19754	1.42844	1.65933	1.89023	2.12112	2.35202	2.58291	2.81381	3.04391	3.2492	3.45449	3.65978	3.86507	4.07035	4.27564	4.48093	4.68622	4.89151	5.0968	5.30209	5.48431	5.08047	4.67664	4.2728	3.86896	3.46512	3.06129	2.65745	2.25362	1.84979	1.44595	1.04211	0.657751	0.687956	0.718162	0.748367	0.778572
8	315	0.284656	0.230841	0.177027	0.123212	0.0693973	0.0155826	0.313589	0.754993	1.1964	1.6378	2.0792	2.52061	2.96202	3.40343	3.84483	4.28624	4.72765	5.16906	5.17168	5.00148	4.83127	4.66108	4.49088	4.32068	4.15048	3.98028	3.81008	3.63988	3.46967	3.29947	3.35202	3.4893	3.62658	3.76386	3.90114	4.03843	4.1757	4.31298	4.45026	4.58754	4.72482	4.8621	4.71926	4.47357	4.22787	3.98217	3.73647	3.49077
8	315	0.204567	0.223627	0.429509	0.701178	0.972848	1.24452	1.51619	1.78786	2.05953	2.3312	2.60287	2.87454	3.14621	3.41788	3.26969	2.97896	2.68823	2.3975	2.10676	1.81603	1.5253	1.23458	0.943846	0.653116	0.362384	0.071652	0	0	0	0	0	0	0	0	0	0	0	0	0.00355756	0.00823527	0.012913	0.0175907	0.0222684	0.0269461	0.0316239	0.0363016	0.0409793	0.045657
8	315	0.999046	0.938492	0.877937	0.817383	0.756828	0.696274	0.63572	0.575165	0.514611	0.471316	0.42856	0.385803	0.343046	0.30029	0.257533	0.214777	0.17202	0.129264	0.0865073	0.0437508	0.000994522	0.456411	0.923691	1.39097	1.85825	2.32554	2.79282	3.2601	3.72739	4.19467	4.66195	5.12923	5.59652	5.2103	4.80997	4.40964	4.00932	3.60899	3.20866	2.80833	2.408	2.00767	1.60734	1.20701	0.806683	0.825297	0.847839	0.870381
mean data
	time(s)=>	0	0.0166618	0.0333237	0.0499855	0.0666473	0.0833093	0.0999712	0.116633	0.133295	0.149957	0.166619	0.183281	0.199943	0.216605	0.233267	0.249929	0.26659	0.283252	0.299914	0.316576	0.333238	0.3499	0.366562	0.383224	0.399886	0.416548	0.43321	0.449872	0.466534	0.483196	0.499857	0.516519	0.533181	0.549843	0.566505	0.583167	0.599829	0.61649	0.633152	0.649814	0.666476	0.683138	0.6998	0.716462	0.733124	0.749786	0.766448	0.78311
neuron	grating direction (deg)
1	0	0.27687	0.28487	0.292869	0.300869	0.309125	0.333505	0.436375	0.539246	0.642116	0.74877	0.832227	0.898445	0.964662	1.03088	1.0971	1.16331	1.2298	1.3049	1.2957	1.29807	1.30044	1.29643	1.29639	1.30532	1.31426	1.32319	1.33213	1.34106	1.34885	1.3211	1.284	1.23348	1.18297	1.13688	1.09932	1.06176	1.0242	0.986638	0.949076	0.911515	0.875197	0.87195	0.906934	0.934929	0.962925	0.99092	1.01892	1.04691
1	45	0.635711	0.664869	0.694027	0.719267	0.744203	0.768085	0.790795	0.817268	0.836186	0.815845	0.825115	0.849671	0.874226	0.898782	0.923337	0.954703	0.964239	0.963798	0.963758	0.963718	0.977412	1.02086	1.00746	0.965612	0.923765	0.881917	0.840069	0.791485	0.756801	0.724746	0.690845	0.656943	0.627289	0.60654	0.621157	0.656241	0.691373	0.726505	0.761637	0.795297	0.813681	0.838484	0.866867	0.897938	0.925857	0.934365	0.937449	0.931289
1	90	0.368542	0.393253	0.417965	0.442986	0.471806	0.505374	0.539839	0.565454	0.581291	0.605227	0.629229	0.641105	0.638557	0.63601	0.633463	0.630238	0.619474	0.603822	0.579717	0.558942	0.544592	0.542156	0.539734	0.52126	0.498476	0.475692	0.452908	0.430492	0.411816	0.391769	0.37304	0.358685	0.348921	0.325895	0.302869	0.306397	0.332296	0.358196	0.384095	0.409995	0.435894	0.459733	0.485697	0.508297	0.521612	0.531141	0.54067	0.527992
1	135	0.384846	0.452103	0.519551	0.586999	0.654447	0.738601	0.849635	0.96067	1.03753	1.07464	1.11175	1.14887	1.18598	1.27716	1.37876	1.48036	1.58196	1.65216	1.67331	1.69446	1.71932	1.74603	1.77275	1.79946	1.82617	1.76963	1.69789	1.62615	1.5544	1.49864	1.46712	1.43561	1.36733	1.29821	1.22909	1.15996	1.09084	1.04849	1.01076	0.97302	0.935285	0.9115	0.908265	0.90503	0.93412	0.96821	1.0023	1.03639
1	180	0.315581	0.292332	0.269083	0.245835	0.223194	0.209986	0.196777	0.18792	0.195385	0.220753	0.247451	0.274149	0.323291	0.378843	0.434396	0.489949	0.545661	0.603572	0.661484	0.723519	0.79701	0.859018	0.919927	0.980835	0.998874	0.995092	0.99131	0.987528	0.983637	0.978403	0.973169	0.965917	0.940751	0.903186	0.865162	0.827138	0.790436	0.754502	0.718569	0.682635	0.646362	0.606256	0.56615	0.517291	0.45839	0.410351	0.362886	0.31542
1	225	0.352391	0.336066	0.321479	0.31145	0.307172	0.307657	0.309679	0.312599	0.315519	0.337185	0.381549	0.398884	0.415551	0.432217	0.451016	0.472821	0.498292	0.536115	0.565693	0.590607	0.615521	0.640418	0.692071	0.788565	0.885806	0.983047	1.08034	1.17791	1.27533	1.36452	1.46713	1.5771	1.68707	1.75943	1.78191	1.80055	1.81916	1.83778	1.85628	1.87424	1.88917	1.86793	1.82973	1.78251	1.7353	1.71139	1.66641	1.56936
1	270	0.518417	0.54039	0.569837	0.603945	0.638053	0.672162	0.708775	0.745891	0.782694	0.819496	0.850829	0.877254	0.916893	0.934915	0.934131	0.918284	0.902438	0.886592	0.862679	0.836798	0.811666	0.786534	0.75459	0.704702	0.659249	0.674142	0.69815	0.731674	0.765197	0.798721	0.841774	0.901252	0.966641	1.03203	1.09573	1.15645	1.19324	1.14	1.08742	1.03393	0.980444	0.926957	0.863472	0.778323	0.685067	0.591812	0.507962	0.445142
1	315	0.465803	0.457464	0.480803	0.5135	0.546197	0.578894	0.655247	0.740209	0.851599	0.965148	1.10909	1.27712	1.44514	1.61317	1.73119	1.83172	1.93224	2.03276	2.07912	2.12096	2.1597	2.26071	2.30681	2.30939	2.31198	2.31456	2.33006	2.35281	2.37556	2.39831	2.44853	2.49855	2.47531	2.34539	2.23668	2.14518	2.05369	1.96219	1.88497	1.8094	1.73383	1.65826	1.54654	1.4039	1.31309	1.27464	1.24025	1.20847
2	0	0.27687	0.28487	0.292869	0.300869	0.309125	0.333505	0.436375	0.539246	0.642116	0.74877	0.832227	0.898445	0.964662	1.03088	1.0971	1.16331	1.2298	1.3049	1.2957	1.29807	1.30044	1.29643	1.29639	1.30532	1.31426	1.32319	1.33213	1.34106	1.34885	1.3211	1.284	1.23348	1.18297	1.13688	1.09932	1.06176	1.0242	0.986638	0.949076	0.911515	0.875197	0.87195	0.906934	0.934929	0.962925	0.99092	1.01892	1.04691
2	45	0.635711	0.664869	0.694027	0.719267	0.744203	0.768085	0.790795	0.817268	0.836186	0.815845	0.825115	0.849671	0.874226	0.898782	0.923337	0.954703	0.964239	0.963798	0.963758	0.963718	0.977412	1.02086	1.00746	0.965612	0.923765	0.881917	0.840069	0.791485	0.756801	0.724746	0.690845	0.656943	0.627289	0.60654	0.621157	0.656241	0.691373	0.726505	0.761637	0.795297	0.813681	0.838484	0.866867	0.897938	0.925857	0.934365	0.937449	0.931289
2	90	0.368542	0.393253	0.417965	0.442986	0.471806	0.505374	0.539839	0.565454	0.581291	0.605227	0.629229	0.641105	0.638557	0.63601	0.633463	0.630238	0.619474	0.603822	0.579717	0.558942	0.544592	0.542156	0.539734	0.52126	0.498476	0.475692	0.452908	0.430492	0.411816	0.391769	0.37304	0.358685	0.348921	0.325895	0.302869	0.306397	0.332296	0.358196	0.384095	0.409995	0.435894	0.459733	0.485697	0.508297	0.521612	0.531141	0.54067	0.527992
2	135	0.384846	0.452103	0.519551	0.586999	0.654447	0.738601	0.849635	0.96067	1.03753	1.07464	1.11175	1.14887	1.18598	1.27716	1.37876	1.48036	1.58196	1.65216	1.67331	1.69446	1.71932	1.74603	1.77275	1.79946	1.82617	1.76963	1.69789	1.62615	1.5544	1.49864	1.46712	1.43561	1.36733	1.29821	1.22909	1.15996	1.09084	1.04849	1.01076	0.97302	0.935285	0.9115	0.908265	0.90503	0.93412	0.96821	1.0023	1.03639
2	180	0.315581	0.292332	0.269083	0.245835	0.223194	0.209986	0.196777	0.18792	0.195385	0.220753	0.247451	0.274149	0.323291	0.378843	0.434396	0.489949	0.545661	0.603572	0.661484	0.723519	0.79701	0.859018	0.919927	0.980835	0.998874	0.995092	0.99131	0.987528	0.983637	0.978403	0.973169	0.965917	0.940751	0.903186	0.865162	0.827138	0.790436	0.754502	0.718569	0.682635	0.646362	0.606256	0.56615	0.517291	0.45839	0.410351	0.362886	0.31542
2	225	0.352391	0.336066	0.321479	0.31145	0.307172	0.307657	0.309679	0.312599	0.315519	0.337185	0.381549	0.398884	0.415551	0.432217	0.451016	0.472821	0.498292	0.536115	0.565693	0.590607	0.615521	0.640418	0.692071	0.788565	0.885806	0.983047	1.08034	1.17791	1.27533	1.36452	1.46713	1.5771	1.68707	1.75943	1.78191	1.80055	1.81916	1.83778	1.85628	1.87424	1.88917	1.86793	1.82973	1.78251	1.7353	1.71139	1.66641	1.56936
2	270	0.518417	0.54039	0.569837	0.603945	0.638053	0.672162	0.708775	0.745891	0.782694	0.819496	0.850829	0.877254	0.916893	0.934915	0.934131	0.918284	0.902438	0.886592	0.862679	0.836798	0.811666	0.786534	0.75459	0.704702	0.659249	0.674142	0.69815	0.731674	0.765197	0.798721	0.841774	0.901252	0.966641	1.03203	1.09573	1.15645	1.19324	1.14	1.08742	1.03393	0.980444	0.926957	0.863472	0.778323	0.685067	0.591812	0.507962	0.445142
2	315	0.465803	0.457464	0.480803	0.5135	0.546197	0.578894	0.655247	0.740209	0.851599	0.965148	1.10909	1.27712	1.44514	1.61317	1.73119	1.83172	1.93224	2.03276	2.07912	2.12096	2.1597	2.26071	2.30681	2.30939	2.31198	2.31456	2.33006	2.35281	2.37556	2.39831	2.44853	2.49855	2.47531	2.34539	2.23668	2.14518	2.05369	1.96219	1.88497	1.8094	1.73383	1.65826	1.54654	1.4039	1.31309	1.27464	1.24025	1.20847
3	0	0.27687	0.28487	0.292869	0.300869	0.309125	0.333505	0.436375	0.539246	0.642116	0.74877	0.832227	0.898445	0.964662	1.03088	1.0971	1.16331	1.2298	1.3049	1.2957	1.29807	1.30044	1.29643	1.29639	1.30532	1.31426	1.32319	1.33213	1.34106	1.34885	1.3211	1.284	1.23348	1.18297	1.13688	1.09932	1.06176	1.0242	0.986638	0.949076	0.911515	0.875197	0.87195	0.906934	0.934929	0.962925	0.99092	1.01892	1.04691
3	45	0.635711	0.664869	0.694027	0.719267	0.744203	0.768085	0.790795	0.817268	0.836186	0.815845	0.825115	0.849671	0.874226	0.898782	0.923337	0.954703	0.964239	0.963798	0.963758	0.963718	0.977412	1.02086	1.00746	0.965612	0.923765	0.881917	0.840069	0.791485	0.756801	0.724746	0.690845	0.656943	0.627289	0.60654	0.621157	0.656241	0.691373	0.726505	0.761637	0.795297	0.813681	0.838484	0.866867	0.897938	0.925857	0.934365	0.937449	0.931289
3	90	0.368542	0.393253	0.417965	0.442986	0.471806	0.505374	0.539839	0.565454	0.581291	0.605227	0.629229	0.641105	0.638557	0.63601	0.633463	0.630238	0.619474	0.603822	0.579717	0.558942	0.544592	0.542156	0.539734	0.52126	0.498476	0.475692	0.452908	0.430492	0.411816	0.391769	0.37304	0.358685	0.348921	0.325895	0.302869	0.306397	0.332296	0.358196	0.384095	0.409995	0.435894	0.459733	0.485697	0.508297	0.521612	0.531141	0.54067	0.527992
3	135	0.384846	0.452103	0.519551	0.586999	0.654447	0.738601	0.849635	0.96067	1.03753	1.07464	1.11175	1.14887	1.18598	1.27716	1.37876	1.48036	1.58196	1.65216	1.67331	1.69446	1.71932	1.74603	1.77275	1.79946	1.82617	1.76963	1.69789	1.62615	1.5544	1.49864	1.46712	1.43561	1.36733	1.29821	1.22909	1.15996	1.09084	1.04849	1.01076	0.97302	0.935285	0.9115	0.908265	0.90503	0.93412	0.96821	1.0023	1.03639
3	180	0.315581	0.292332	0.269083	0.245835	0.223194	0.209986	0.196777	0.18792	0.195385	0.220753	0.247451	0.274149	0.323291	0.378843	0.434396	0.489949	0.545661	0.603572	0.661484	0.723519	0.79701	0.859018	0.919927	0.980835	0.998874	0.995092	0.99131	0.987528	0.983637	0.978403	0.973169	0.965917	0.940751	0.903186	0.865162	0.827138	0.790436	0.754502	0.718569	0.682635	0.646362	0.606256	0.56615	0.517291	0.45839	0.410351	0.362886	0.31542
3	225	0.352391	0.336066	0.321479	0.31145	0.307172	0.307657	0.309679	0.312599	0.315519	0.337185	0.381549	0.398884	0.415551	0.432217	0.451016	0.472821	0.498292	0.536115	0.565693	0.590607	0.615521	0.640418	0.692071	0.788565	0.885806	0.983047	1.08034	1.17791	1.27533	1.36452	1.46713	1.5771	1.68707	1.75943	1.78191	1.80055	1.81916	1.83778	1.85628	1.87424	1.88917	1.86793	1.82973	1.78251	1.7353	1.71139	1.66641	1.56936
3	270	0.518417	0.54039	0.569837	0.603945	0.638053	0.672162	0.708775	0.745891	0.782694	0.819496	0.850829	0.877254	0.916893	0.934915	0.934131	0.918284	0.902438	0.886592	0.862679	0.836798	0.811666	0.786534	0.75459	0.704702	0.659249	0.674142	0.69815	0.731674	0.765197	0.798721	0.841774	0.901252	0.966641	1.03203	1.09573	1.15645	1.19324	1.14	1.08742	1.03393	0.980444	0.926957	0.863472	0.778323	0.685067	0.591812	0.507962	0.445142
3	315	0.465803	0.457464	0.480803	0.5135	0.546197	0.578894	0.655247	0.740209	0.851599	0.965148	1.10909	1.27712	1.44514	1.61317	1.73119	1.83172	1.93224	2.03276	2.07912	2.12096	2.1597	2.26071	2.30681	2.30939	2.31198	2.31456	2.33006	2.35281	2.37556	2.39831	2.44853	2.49855	2.47531	2.34539	2.23668	2.14518	2.05369	1.96219	1.88497	1.8094	1.73383	1.65826	1.54654	1.4039	1.31309	1.27464	1.24025	1.20847
4	0	0.27687	0.28487	0.292869	0.300869	0.309125	0.333505	0.436375	0.539246	0.642116	0.74877	0.832227	0.898445	0.964662	1.03088	1.0971	1.16331	1.2298	1.3049	1.2957	1.29807	1.30044	1.29643	1.29639	1.30532	1.31426	1.32319	1.33213	1.34106	1.34885	1.3211	1.284	1.23348	1.18297	1.13688	1.09932	1.06176	1.0242	0.986638	0.949076	0.911515	0.875197	0.87195	0.906934	0.934929	0.962925	0.99092	1.01892	1.04691
4	45	0.635711	0.664869	0.694027	0.719267	0.744203	0.768085	0.790795	0.817268	0.836186	0.815845	0.825115	0.849671	0.874226	0.898782	0.923337	0.954703	0.964239	0.963798	0.963758	0.963718	0.977412	1.02086	1.00746	0.965612	0.923765	0.881917	0.840069	0.791485	0.756801	0.724746	0.690845	0.656943	0.627289	0.60654	0.621157	0.656241	0.691373	0.726505	0.761637	0.795297	0.813681	0.838484	0.866867	0.897938	0.925857	0.934365	0.937449	0.931289
4	90	0.368542	0.393253	0.417965	0.442986	0.471806	0.505374	0.539839	0.565454	0.581291	0.605227	0.629229	0.641105	0.638557	0.63601	0.633463	0.630238	0.619474	0.603822	0.579717	0.558942	0.544592	0.542156	0.539734	0.52126	0.498476	0.475692	0.452908	0.430492	0.411816	0.391769	0.37304	0.358685	0.348921	0.325895	0.302869	0.306397	0.332296	0.358196	0.384095	0.409995	0.435894	0.459733	0.485697	0.508297	0.521612	0.531141	0.54067	0.527992
4	135	0.384846	0.452103	0.519551	0.586999	0.654447	0.738601	0.849635	0.96067	1.03753	1.07464	1.11175	1.14887	1.18598	1.27716	1.37876	1.48036	1.58196	1.65216	1.67331	1.69446	1.71932	1.74603	1.77275	1.79946	1.82617	1.76963	1.69789	1.62615	1.5544	1.49864	1.46712	1.43561	1.36733	1.29821	1.22909	1.15996	1.09084	1.04849	1.01076	0.97302	0.935285	0.9115	0.908265	0.90503	0.93412	0.96821	1.0023	1.03639
4	180	0.315581	0.292332	0.269083	0.245835	0.223194	0.209986	0.196777	0.18792	0.195385	0.220753	0.247451	0.274149	0.323291	0.378843	0.434396	0.489949	0.545661	0.603572	0.661484	0.723519	0.79701	0.859018	0.919927	0.980835	0.998874	0.995092	0.99131	0.987528	0.983637	0.978403	0.973169	0.965917	0.940751	0.903186	0.865162	0.827138	0.790436	0.754502	0.718569	0.682635	0.646362	0.606256	0.56615	0.517291	0.45839	0.410351	0.362886	0.31542
4	225	0.352391	0.336066	0.321479	0.31145	0.307172	0.307657	0.309679	0.312599	0.315519	0.337185	0.381549	0.398884	0.415551	0.432217	0.451016	0.472821	0.498292	0.536115	0.565693	0.590607	0.615521	0.640418	0.692071	0.788565	0.885806	0.983047	1.08034	1.17791	1.27533	1.36452	1.46713	1.5771	1.68707	1.75943	1.78191	1.80055	1.81916	1.83778	1.85628	1.87424	1.88917	1.86793	1.82973	1.78251	1.7353	1.71139	1.66641	1.56936
4	270	0.518417	0.54039	0.569837	0.603945	0.638053	0.672162	0.708775	0.745891	0.782694	0.819496	0.850829	0.877254	0.916893	0.934915	0.934131	0.918284	0.902438	0.886592	0.862679	0.836798	0.811666	0.786534	0.75459	0.704702	0.659249	0.674142	0.69815	0.731674	0.765197	0.798721	0.841774	0.901252	0.966641	1.03203	1.09573	1.15645	1.19324	1.14	1.08742	1.03393	0.980444	0.926957	0.863472	0.778323	0.685067	0.591812	0.507962	0.445142
4	315	0.465803	0.457464	0.480803	0.5135	0.546197	0.578894	0.655247	0.740209	0.851599	0.965148	1.10909	1.27712	1.44514	1.61317	1.73119	1.83172	1.93224	2.03276	2.07912	2.12096	2.1597	2.26071	2.30681	2.30939	2.31198	2.31456	2.33006	2.35281	2.37556	2.39831	2.44853	2.49855	2.47531	2.34539	2.23668	2.14518	2.05369	1.96219	1.88497	1.8094	1.73383	1.65826	1.54654	1.4039	1.31309	1.27464	1.24025	1.20847
5	0	0.27687	0.28487	0.292869	0.300869	0.309125	0.333505	0.436375	0.539246	0.642116	0.74877	0.832227	0.898445	0.964662	1.03088	1.0971	1.16331	1.2298	1.3049	1.2957	1.29807	1.30044	1.29643	1.29639	1.30532	1.31426	1.32319	1.33213	1.34106	1.34885	1.3211	1.284	1.23348	1.18297	1.13688	1.09932	1.06176	1.0242	0.986638	0.949076	0.911515	0.875197	0.87195	0.906934	0.934929	0.962925	0.99092	1.01892	1.04691
5	45	0.635711	0.664869	0.694027	0.719267	0.744203	0.768085	0.790795	0.817268	0.836186	0.815845	0.825115	0.849671	0.874226	0.898782	0.923337	0.954703	0.964239	0.963798	0.963758	0.963718	0.977412	1.02086	1.00746	0.965612	0.923765	0.881917	0.840069	0.791485	0.756801	0.724746	0.690845	0.656943	0.627289	0.60654	0.621157	0.656241	0.691373	0.726505	0.761637	0.795297	0.813681	0.838484	0.866867	0.897938	0.925857	0.934365	0.937449	0.931289
5	90	0.368542	0.393253	0.417965	0.442986	0.471806	0.505374	0.539839	0.565454	0.581291	0.605227	0.629229	0.641105	0.638557	0.63601	0.633463	0.630238	0.619474	0.603822	0.579717	0.558942	0.544592	0.542156	0.539734	0.52126	0.498476	0.475692	0.452908	0.430492	0.411816	0.391769	0.37304	0.358685	0.348921	0.325895	0.302869	0.306397	0.332296	0.358196	0.384095	0.409995	0.435894	0.459733	0.485697	0.508297	0.521612	0.531141	0.54067	0.527992
5	135	0.384846	0.452103	0.519551	0.586999	0.654447	0.738601	0.849635	0.96067	1.03753	1.07464	1.11175	1.14887	1.18598	1.27716	1.37876	1.48036	1.58196	1.65216	1.67331	1.69446	1.71932	1.74603	1.77275	1.79946	1.82617	1.76963	1.69789	1.62615	1.5544	1.49864	1.46712	1.43561	1.36733	1.29821	1.22909	1.15996	1.09084	1.04849	1.01076	0.97302	0.935285	0.9115	0.908265	0.90503	0.93412	0.96821	1.0023	1.03639
5	180	0.315581	0.292332	0.269083	0.245835	0.223194	0.209986	0.196777	0.18792	0.195385	0.220753	0.247451	0.274149	0.323291	0.378843	0.434396	0.489949	0.545661	0.603572	0.661484	0.723519	0.79701	0.859018	0.919927	0.980835	0.998874	0.995092	0.99131	0.987528	0.983637	0.978403	0.973169	0.965917	0.940751	0.903186	0.865162	0.827138	0.790436	0.754502	0.718569	0.682635	0.646362	0.606256	0.56615	0.517291	0.45839	0.410351	0.362886	0.31542
5	225	0.352391	0.336066	0.321479	0.31145	0.307172	0.307657	0.309679	0.312599	0.315519	0.337185	0.381549	0.398884	0.415551	0.432217	0.451016	0.472821	0.498292	0.536115	0.565693	0.590607	0.615521	0.640418	0.692071	0.788565	0.885806	0.983047	1.08034	1.17791	1.27533	1.36452	1.46713	1.5771	1.68707	1.75943	1.78191	1.80055	1.81916	1.83778	1.85628	1.87424	1.88917	1.86793	1.82973	1.78251	1.7353	1.71139	1.66641	1.56936
5	270	0.518417	0.54039	0.569837	0.603945	0.638053	0.672162	0.708775	0.745891	0.782694	0.819496	0.850829	0.877254	0.916893	0.934915	0.934131	0.918284	0.902438	0.886592	0.862679	0.836798	0.811666	0.786534	0.75459	0.704702	0.659249	0.674142	0.69815	0.731674	0.765197	0.798721	0.841774	0.901252	0.966641	1.03203	1.09573	1.15645	1.19324	1.14	1.08742	1.03393	0.980444	0.926957	0.863472	0.778323	0.685067	0.591812	0.507962	0.445142
5	315	0.465803	0.457464	0.480803	0.5135	0.546197	0.578894	0.655247	0.740209	0.851599	0.965148	1.10909	1.27712	1.44514	1.61317	1.73119	1.83172	1.93224	2.03276	2.07912	2.12096	2.1597	2.26071	2.30681	2.30939	2.31198	2.31456	2.33006	2.35281	2.37556	2.39831	2.44853	2.49855	2.47531	2.34539	2.23668	2.14518	2.05369	1.96219	1.88497	1.8094	1.73383	1.65826	1.54654	1.4039	1.31309	1.27464	1.24025	1.20847
6	0	0.27687	0.28487	0.292869	0.300869	0.309125	0.333505	0.436375	0.539246	0.642116	0.74877	0.832227	0.898445	0.964662	1.03088	1.0971	1.16331	1.2298	1.3049	1.2957	1.29807	1.30044	1.29643	1.29639	1.30532	1.31426	1.32319	1.33213	1.34106	1.34885	1.3211	1.284	1.23348	1.18297	1.13688	1.09932	1.06176	1.0242	0.986638	0.949076	0.911515	0.875197	0.87195	0.906934	0.934929	0.962925	0.99092	1.01892	1.04691
6	45	0.635711	0.664869	0.694027	0.719267	0.744203	0.768085	0.790795	0.817268	0.836186	0.815845	0.825115	0.849671	0.874226	0.898782	0.923337	0.954703	0.964239	0.963798	0.963758	0.963718	0.977412	1.02086	1.00746	0.965612	0.923765	0.881917	0.840069	0.791485	0.756801	0.724746	0.690845	0.656943	0.627289	0.60654	0.621157	0.656241	0.691373	0.726505	0.761637	0.795297	0.813681	0.838484	0.866867	0.897938	0.925857	0.934365	0.937449	0.931289
6	90	0.368542	0.393253	0.417965	0.442986	0.471806	0.505374	0.539839	0.565454	0.581291	0.605227	0.629229	0.641105	0.638557	0.63601	0.633463	0.630238	0.619474	0.603822	0.579717	0.558942	0.544592	0.542156	0.539734	0.52126	0.498476	0.475692	0.452908	0.430492	0.411816	0.391769	0.37304	0.358685	0.348921	0.325895	0.302869	0.306397	0.332296	0.358196	0.384095	0.409995	0.435894	0.459733	0.485697	0.508297	0.521612	0.531141	0.54067	0.527992
6	135	0.384846	0.452103	0.519551	0.586999	0.654447	0.738601	0.849635	0.96067	1.03753	1.07464	1.11175	1.14887	1.18598	1.27716	1.37876	1.48036	1.58196	1.65216	1.67331	1.69446	1.71932	1.74603	1.77275	1.79946	1.82617	1.76963	1.69789	1.62615	1.5544	1.49864	1.46712	1.43561	1.36733	1.29821	1.22909	1.15996	1.09084	1.04849	1.01076	0.97302	0.935285	0.9115	0.908265	0.90503	0.93412	0.96821	1.0023	1.03639
6	180	0.315581	0.292332	0.269083	0.245835	0.223194	0.209986	0.196777	0.18792	0.195385	0.220753	0.247451	0.274149	0.323291	0.378843	0.434396	0.489949	0.545661	0.603572	0.661484	0.723519	0.79701	0.859018	0.919927	0.980835	0.998874	0.995092	0.99131	0.987528	0.983637	0.978403	0.973169	0.965917	0.940751	0.903186	0.865162	0.827138	0.790436	0.754502	0.718569	0.682635	0.646362	0.606256	0.56615	0.517291	0.45839	0.410351	0.362886	0.31542
6	225	0.352391	0.336066	0.321479	0.31145	0.307172	0.307657	0.309679	0.312599	0.315519	0.337185	0.381549	0.398884	0.415551	0.432217	0.451016	0.472821	0.498292	0.536115	0.565693	0.590607	0.615521	0.640418	0.692071	0.788565	0.885806	0.983047	1.08034	1.17791	1.27533	1.36452	1.46713	1.5771	1.68707	1.75943	1.78191	1.80055	1.81916	1.83778	1.85628	1.87424	1.88917	1.86793	1.82973	1.78251	1.7353	1.71139	1.66641	1.56936
6	270	0.518417	0.54039	0.569837	0.603945	0.638053	0.672162	0.708775	0.745891	0.782694	0.819496	0.850829	0.877254	0.916893	0.934915	0.934131	0.918284	0.902438	0.886592	0.862679	0.836798	0.811666	0.786534	0.75459	0.704702	0.659249	0.674142	0.69815	0.731674	0.765197	0.798721	0.841774	0.901252	0.966641	1.03203	1.09573	1.15645	1.19324	1.14	1.08742	1.03393	0.980444	0.926957	0.863472	0.778323	0.685067	0.591812	0.507962	0.445142
6	315	0.465803	0.457464	0.480803	0.5135	0.546197	0.578894	0.655247	0.740209	0.851599	0.965148	1.10909	1.27712	1.44514	1.61317	1.73119	1.83172	1.93224	2.03276	2.07912	2.12096	2.1597	2.26071	2.30681	2.30939	2.31198	2.31456	2.33006	2.35281	2.37556	2.39831	2.44853	2.49855	2.47531	2.34539	2.23668	2.14518	2.05369	1.96219	1.88497	1.8094	1.73383	1.65826	1.54654	1.4039	1.31309	1.27464	1.24025	1.20847
7	0	0.27687	0.28487	0.292869	0.300869	0.309125	0.333505	0.436375	0.539246	0.642116	0.74877	0.832227	0.898445	0.964662	1.03088	1.0971	1.16331	1.2298	1.3049	1.2957	1.29807	1.30044	1.29643	1.29639	1.30532	1.31426	1.32319	1.33213	1.34106	1.34885	1.3211	1.284	1.23348	1.18297	1.13688	1.09932	1.06176	1.0242	0.986638	0.949076	0.911515	0.875197	0.87195	0.906934	0.934929	0.962925	0.99092	1.01892	1.04691
7	45	0.635711	0.664869	0.694027	0.719267	0.744203	0.768085	0.790795	0.817268	0.836186	0.815845	0.825115	0.849671	0.874226	0.898782	0.923337	0.954703	0.964239	0.963798	0.963758	0.963718	0.977412	1.02086	1.00746	0.965612	0.923765	0.881917	0.840069	0.791485	0.756801	0.724746	0.690845	0.656943	0.627289	0.60654	0.621157	0.656241	0.691373	0.726505	0.761637	0.795297	0.813681	0.838484	0.866867	0.897938	0.925857	0.934365	0.937449	0.931289
7	90	0.368542	0.393253	0.417965	0.442986	0.471806	0.505374	0.539839	0.565454	0.581291	0.605227	0.629229	0.641105	0.638557	0.63601	0.633463	0.630238	0.619474	0.603822	0.579717	0.558942	0.544592	0.542156	0.539734	0.52126	0.498476	0.475692	0.452908	0.430492	0.411816	0.391769	0.37304	0.358685	0.348921	0.325895	0.302869	0.306397	0.332296	0.358196	0.384095	0.409995	0.435894	0.459733	0.485697	0.508297	0.521612	0.531141	0.54067	0.527992
7	135	0.384846	0.452103	0.519551	0.586999	0.654447	0.738601	0.849635	0.96067	1.03753	1.07464	1.11175	1.14887	1.18598	1.27716	1.37876	1.48036	1.58196	1.65216	1.67331	1.69446	1.71932	1.74603	1.77275	1.79946	1.82617	1.76963	1.69789	1.62615	1.5544	1.49864	1.46712	1.43561	1.36733	1.29821	1.22909	1.15996	1.09084	1.04849	1.01076	0.97302	0.935285	0.9115	0.908265	0.90503	0.93412	0.96821	1.0023	1.03639
7	180	0.315581	0.292332	0.269083	0.245835	0.223194	0.209986	0.196777	0.18792	0.195385	0.220753	0.247451	0.274149	0.323291	0.378843	0.434396	0.489949	0.545661	0.603572	0.661484	0.723519	0.79701	0.859018	0.919927	0.980835	0.998874	0.995092	0.99131	0.987528	0.983637	0.978403	0.973169	0.965917	0.940751	0.903186	0.865162	0.827138	0.790436	0.754502	0.718569	0.682635	0.646362	0.606256	0.56615	0.517291	0.45839	0.410351	0.362886	0.31542
7	225	0.352391	0.336066	0.321479	0.31145	0.307172	0.307657	0.309679	0.312599	0.315519	0.337185	0.381549	0.398884	0.415551	0.432217	0.451016	0.472821	0.498292	0.536115	0.565693	0.590607	0.615521	0.640418	0.692071	0.788565	0.885806	0.983047	1.08034	1.17791	1.27533	1.36452	1.46713	1.5771	1.68707	1.75943	1.78191	1.80055	1.81916	1.83778	1.85628	1.87424	1.88917	1.86793	1.82973	1.78251	1.7353	1.71139	1.66641	1.56936
7	270	0.518417	0.54039	0.569837	0.603945	0.638053	0.672162	0.708775	0.745891	0.782694	0.819496	0.850829	0.877254	0.916893	0.934915	0.934131	0.918284	0.902438	0.886592	0.862679	0.836798	0.811666	0.786534	0.75459	0.704702	0.659249	0.674142	0.69815	0.731674	0.765197	0.798721	0.841774	0.901252	0.966641	1.03203	1.09573	1.15645	1.19324	1.14	1.08742	1.03393	0.980444	0.926957	0.863472	0.778323	0.685067	0.591812	0.507962	0.445142
7	315	0.465803	0.457464	0.480803	0.5135	0.546197	0.578894	0.655247	0.740209	0.851599	0.965148	1.10909	1.27712	1.44514	1.61317	1.73119	1.83172	1.93224	2.03276	2.07912	2.12096	2.1597	2.26071	2.30681	2.30939	2.31198	2.31456	2.33006	2.35281	2.37556	2.39831	2.44853	2.49855	2.47531	2.34539	2.23668	2.14518	2.05369	1.96219	1.88497	1.8094	1.73383	1.65826	1.54654	1.4039	1.31309	1.27464	1.24025	1.20847
8	0	0.27687	0.28487	0.292869	0.300869	0.309125	0.333505	0.436375	0.539246	0.642116	0.74877	0.832227	0.898445	0.964662	1.03088	1.0971	1.16331	1.2298	1.3049	1.2957	1.29807	1.30044	1.29643	1.29639	1.30532	1.31426	1.32319	1.33213	1.34106	1.34885	1.3211	1.284	1.23348	1.18297	1.13688	1.09932	1.06176	1.0242	0.986638	0.949076	0.911515	0.875197	0.87195	0.906934	0.934929	0.962925	0.99092	1.01892	1.04691
8	45	0.635711	0.664869	0.694027	0.719267	0.744203	0.768085	0.790795	0.817268	0.836186	0.815845	0.825115	0.849671	0.874226	0.898782	0.923337	0.954703	0.964239	0.963798	0.963758	0.963718	0.977412	1.02086	1.00746	0.965612	0.923765	0.881917	0.840069	0.791485	0.756801	0.724746	0.690845	0.656943	0.627289	0.60654	0.621157	0.656241	0.691373	0.726505	0.761637	0.795297	0.813681	0.838484	0.866867	0.897938	0.925857	0.934365	0.937449	0.931289
8	90	0.368542	0.393253	0.417965	0.442986	0.471806	0.505374	0.539839	0.565454	0.581291	0.605227	0.629229	0.641105	0.638557	0.63601	0.633463	0.630238	0.619474	0.603822	0.579717	0.558942	0.544592	0.542156	0.539734	0.52126	0.498476	0.475692	0.452908	0.430492	0.411816	0.391769	0.37304	0.358685	0.348921	0.325895	0.302869	0.306397	0.332296	0.358196	0.384095	0.409995	0.435894	0.459733	0.485697	0.508297	0.521612	0.531141	0.54067	0.527992
8	135	0.384846	0.452103	0.519551	0.586999	0.654447	0.738601	0.849635	0.96067	1.03753	1.07464	1.11175	1.14887	1.18598	1.27716	1.37876	1.48036	1.58196	1.65216	1.67331	1.69446	1.71932	1.74603	1.77275	1.79946	1.82617	1.76963	1.69789	1.62615	1.5544	1.49864	1.46712	1.43561	1.36733	1.29821	1.22909	1.15996	1.09084	1.04849	1.01076	0.97302	0.935285	0.9115	0.908265	0.90503	0.93412	0.96821	1.0023	1.03639
8	180	0.315581	0.292332	0.269083	0.245835	0.223194	0.209986	0.196777	0.18792	0.195385	0.220753	0.247451	0.274149	0.323291	0.378843	0.434396	0.489949	0.545661	0.603572	0.661484	0.723519	0.79701	0.859018	0.919927	0.980835	0.998874	0.995092	0.99131	0.987528	0.983637	0.978403	0.973169	0.965917	0.940751	0.903186	0.865162	0.827138	0.790436	0.754502	0.718569	0.682635	0.646362	0.606256	0.56615	0.517291	0.45839	0.410351	0.362886	0.31542
8	225	0.352391	0.336066	0.321479	0.31145	0.307172	0.307657	0.309679	0.312599	0.315519	0.337185	0.381549	0.398884	0.415551	0.432217	0.451016	0.472821	0.498292	0.536115	0.565693	0.590607	0.615521	0.640418	0.692071	0.788565	0.885806	0.983047	1.08034	1.17791	1.27533	1.36452	1.46713	1.5771	1.68707	1.75943	1.78191	1.80055	1.81916	1.83778	1.85628	1.87424	1.88917	1.86793	1.82973	1.78251	1.7353	1.71139	1.66641	1.56936
8	270	0.518417	0.54039	0.569837	0.603945	0.638053	0.672162	0.708775	0.745891	0.782694	0.819496	0.850829	0.877254	0.916893	0.934915	0.934131	0.918284	0.902438	0.886592	0.862679	0.836798	0.811666	0.786534	0.75459	0.704702	0.659249	0.674142	0.69815	0.731674	0.765197	0.798721	0.841774	0.901252	0.966641	1.03203	1.09573	1.15645	1.19324	1.14	1.08742	1.03393	0.980444	0.926957	0.863472	0.778323	0.685067	0.591812	0.507962	0.445142
8	315	0.465803	0.457464	0.480803	0.5135	0.546197	0.578894	0.655247	0.740209	0.851599	0.965148	1.10909	1.27712	1.44514	1.61317	1.73119	1.83172	1.93224	2.03276	2.07912	2.12096	2.1597	2.26071	2.30681	2.30939	2.31198	2.31456	2.33006	2.35281	2.37556	2.39831	2.44853	2.49855	2.47531	2.34539	2.23668	2.14518	2.05369	1.96219	1.88497	1.8094	1.73383	1.65826	1.54654	1.4039	1.31309	1.27464	1.24025	1.20847
[truncated: 553 more columns]

## Sheet: Fig6E
tdTomato negative	DSI bin centers	0.011	0.032	0.054	0.075	0.097	0.118	0.14	0.161	0.183	0.204	0.226	0.247	0.269	0.29	0.312	0.333	0.355	0.376	0.398	0.419	0.441	0.462	0.484	0.505	0.527
	Neurons (all p)	14	35	46	33	34	26	26	14	13	7	15	11	9	9	0	6	1	3	5	0	4	5	0	1	1
	Neurons (p<0.05)	0	0	0	3	7	8	11	8	8	5	11	10	9	6	0	6	1	3	5	0	4	5	0	1	1
	Neurons (p<0.01)	0	0	0	0	2	3	5	5	7	4	8	8	7	5	0	6	1	2	5	0	4	5	0	1	1

## Sheet: Fig6F
tdTomato positive	DSI bin centers	0.011	0.032	0.054	0.075	0.097	0.118	0.14	0.161	0.183	0.204	0.226	0.247	0.269	0.29	0.312	0.333	0.355	0.376	0.398	0.419	0.441	0.462	0.484	0.505	0.527
	Neurons (all p)	3	3	3	6	6	4	4	2	0	2	1	1	0	0	0	2	0	0	0	0	0	0	0	0	0
	Neurons (p<0.05)	0	0	0	0	2	0	2	2	0	1	1	0	0	0	0	2	0	0	0	0	0	0	0	0	0
	Neurons (p<0.01)	0	0	0	0	0	0	1	0	0	0	1	0	0	0	0	2	0	0	0	0	0	0	0	0	0

## Sheet: Fig6G
p>=0.05		0.01<=p<0.05		p<0.01
preferred direction(rad)	DSI	preferred direction(rad)	DSI	preferred direction(rad)	DSI
-3.0174	0.0506831	0.630705	0.10521	0.405191	0.223661
2.56081	0.0606963	0.59154	0.141797	0.471401	0.123909
-0.12523	0.0351627	1.5553	0.157458	0.389556	0.240068
1.22463	0.0509728	2.47992	0.107302	2.94702	0.195496
-3.02723	0.050396	3.08955	0.0750384	3.00311	0.206885
2.11247	0.0813715	2.50511	0.121274	0.358405	0.142944
-1.62457	0.113472	-1.54995	0.0650115	-0.658363	0.278763
1.12611	0.129186	2.01784	0.139097	2.77509	0.166698
-0.217887	0.0719129	1.69941	0.155032	3.01557	0.2774
2.55695	0.137334	-1.78971	0.139431	0.0570785	0.235518
2.51692	0.129105	-2.83291	0.138701	-0.0289132	0.238477
1.73176	0.060886	-2.62988	0.196871	-0.0880295	0.138376
1.45545	0.0197173	2.34962	0.153098	-0.0487212	0.256948
1.23913	0.128909	2.79406	0.141685	-0.562102	0.191631
2.30453	0.246506	0.496042	0.219593	2.65328	0.387651
1.22573	0.0910285	0.359664	0.105267	-1.6269	0.240263
-1.97337	0.0354445	2.77127	0.0913429	0.0582273	0.343922
-2.63562	0.0705002	0.118502	0.155807	2.86544	0.231762
-3.0492	0.105487	3.09598	0.077542	0.240811	0.222027
-2.66574	0.0615632	2.9529	0.101111	-0.0970911	0.243097
2.39488	0.0810584	2.12414	0.120553	-1.7414	0.324534
1.9538	0.017386	2.26486	0.175276	-1.77197	0.250338
2.36173	0.0589261	0.715827	0.168681	-0.346618	0.284455
-1.37139	0.0341963	1.56001	0.132704	0.248122	0.188834
0.128291	0.0657394	0.115845	0.140082	-2.08899	0.173307
0.616321	0.031224	-0.297239	0.11866	-3.00407	0.128591
2.59846	0.0796517	0.575989	0.0990039	-3.06287	0.434728
-1.17362	0.0428908	-1.34797	0.0888384	-3.02169	0.457407
-1.4929	0.0611715	3.0033	0.293623	-2.91636	0.397384
1.44114	0.0553879	0.46414	0.251294	-0.875812	0.337431
-2.05817	0.0626416	0.495007	0.368384	-0.907646	0.434503
-2.43788	0.0913669	-1.53921	0.251597	0.0276854	0.466326
2.92983	0.0989282	0.272024	0.227696	2.78519	0.332556
0.995293	0.0280303	-0.0168672	0.111773	2.84003	0.0998794
-1.30811	0.0321784	-2.37381	0.12513	2.61564	0.186663
-0.852098	0.0574701	2.65172	0.231452	0.0911626	0.262846
2.14995	0.00836112	2.65839	0.261677	2.93477	0.216502
1.99414	0.0322416	2.99313	0.269279	2.90175	0.326937
-0.797573	0.118966	2.96861	0.2033	2.32933	0.271135
2.38468	0.0294594			2.44674	0.339827
-0.0883147	0.0915542			3.07077	0.14876
-0.253365	0.0302591			-0.595883	0.286207
2.41923	0.147164			-2.49599	0.229014
2.0248	0.0585569			-0.48826	0.288979
1.34257	0.0629047			2.32478	0.102152
-1.47098	0.0927167			2.77422	0.213966
-0.98358	0.050861			-0.542789	0.297495
1.18903	0.015955			2.52531	0.142094
1.30104	0.00817256			-1.39811	0.287509
0.845445	0.0430366			-3.05455	0.250608
2.08045	0.124412			-0.136534	0.159728
-0.191024	0.0664199			-1.59608	0.451825
-0.0788487	0.0446529			2.88185	0.264021
-1.09569	0.105037			3.08941	0.337277
2.69194	0.0872978			-1.70441	0.175434
-1.42905	0.0885964			2.39134	0.157835
1.92488	0.12045			-1.29549	0.377185
0.776701	0.0375787			2.46527	0.464607
1.21468	0.0243781			-0.109152	0.403276
2.58931	0.16223			-0.225117	0.440652
2.48073	0.127385			-1.39672	0.382099
1.87958	0.136263			2.99244	0.361164
-2.53879	0.156891			3.0539	0.187877
-2.74155	0.0812626			-0.812947	0.220899
2.07503	0.175024			2.84906	0.193436
1.83026	0.0708335			-0.523242	0.332852
2.52407	0.0882189			-1.75765	0.261022
2.71594	0.00152631			-2.40328	0.535861
-1.14999	0.103279			-0.394028	0.151914
0.297234	0.176347			1.76146	0.130877
0.467947	0.189081			2.50238	0.145731
-1.84614	0.216016			-1.70225	0.276185
-0.271547	0.0287809			2.81018	0.391851
-1.27977	0.199079			0.788766	0.114099
3.1361	0.0531268			0.770395	0.455424
0.61882	0.0653389			2.96876	0.234153
-1.90426	0.0600635			-0.691745	0.196987
0.722084	0.122967			0.804527	0.224822
-2.60827	0.105072			0.584262	0.440579
0.258565	0.0863757			2.38636	0.23766
1.90293	0.0970212			-1.31238	0.395118
-1.47123	0.0973502			-2.43756	0.508781
-3.06659	0.12203			-0.209213	0.166054
-2.35807	0.0683386
1.09881	0.0421987
-1.46689	0.0519865
1.48357	0.0373667
-0.721331	0.177747
0.972936	0.124867
-0.3874	0.0923992
-2.3583	0.105687
-1.59283	0.0450908
-2.38868	0.0344749
2.46437	0.0753284
1.8492	0.0506752
-1.55851	0.0663732
1.73864	0.129516
0.229312	0.0269617
-2.84245	0.0534291
-0.510157	0.289636
-1.09911	0.0925363
2.09016	0.13061
-2.34969	0.12709
1.74197	0.062635
2.28452	0.0719319
-3.06311	0.0928867
-2.90034	0.198591
-0.574385	0.283528
1.85834	0.0355648
0.0757735	0.290881
-2.66162	0.0144969
2.96583	0.0466334
2.54006	0.240859
-2.48311	0.0581267
-2.11286	0.0655652
0.885753	0.04149
-0.745964	0.0598514
-2.5266	0.0714105
2.76002	0.0987963
0.600595	0.0767874
0.0960329	0.125269
1.19467	0.0176555
-1.79496	0.0885012
1.14588	0.0798547
0.0631483	0.147421
1.34356	0.129231
-2.61206	0.0953397
0.576402	0.0801974
2.42751	0.120509
-2.42964	0.0398483
-2.14852	0.0268754
-1.63245	0.133601
2.30137	0.103013
0.621843	0.165187
0.921864	0.084492
0.587242	0.0982087
-0.12763	0.0711176
-1.95812	0.121247
2.45277	0.195924
1.32979	0.0159032
2.4646	0.0304125
1.41719	0.0592108
0.100192	0.00626226
1.22899	0.116068
-0.114041	0.0365441
-0.502005	0.0587252
2.99472	0.0790032
2.6624	0.0340361
0.591472	0.014744
2.23111	0.111243
0.647073	0.0917414
-0.063491	0.13181
-0.235187	0.0634434
0.311012	0.105419
-0.72046	0.22948
-0.369542	0.0764411
0.584737	0.133153
3.03044	0.124608
-2.42152	0.0274068
-1.51021	0.0713357
0.612048	0.0591136
2.55231	0.0813849
-2.61776	0.0540303
-2.27541	0.0254904
0.0140901	0.163997
-2.94455	0.22651
-1.26982	0.0272242
1.84574	0.0560054
1.53499	0.133908
-0.595277	0.125061
0.70452	0.160282
1.3159	0.0476549
-0.673269	0.106872
3.06181	0.0648184
-0.843222	0.0828967
2.15469	0.0775557
2.90354	0.0869932
2.39585	0.0666248
-2.62637	0.0343461
2.8298	0.0775393
0.92143	0.0590456
1.9292	0.21686
0.101887	0.0726364
-2.76561	0.190327
-1.23679	0.044385
1.20197	0.0492062
2.71407	0.055868
0.101095	0.135805
-0.127752	0.0887843
-1.66289	0.0618335
-0.914094	0.0206949
1.69811	0.00420012
2.32333	0.129114
2.13961	0.0490388
2.33661	0.0349242
-0.495766	0.0560977
1.58231	0.0659063
0.183681	0.0324421
1.39417	0.0606067
1.04491	0.121428
1.20845	0.0923128
2.70316	0.0267577
1.81739	0.0589787
0.846757	0.0602658
-1.37453	0.13297
-2.57208	0.0834598
3.04084	0.0400859
-2.74004	0.0562721
2.21973	0.116213
-0.519765	0.0304318
-1.29649	0.025204
-0.434483	0.0278195
-2.52322	0.12445
-2.61036	0.134023
0.417892	0.0448208
0.776267	0.0147304
2.66289	0.0202009
2.82007	0.011875
2.80527	0.120136
-0.215744	0.0527057
-0.551549	0.0407276
-0.980963	0.155503
3.08814	0.108155
-0.101749	0.0443845
1.75633	0.0355261
-2.12506	0.054932
-0.71842	0.0791259
-0.835479	0.0136256
-1.81532	0.0912212
-2.91645	0.0724682
-2.1145	0.0564528
-1.44972	0.0419212
-2.289	0.0847515

## Sheet: Fig6H
Day post injection	3	5	7	9	11	14	16
mean DSI	0.0243781	0.11914	0.147575	0.134665	0.150436	0.144493	0.11992
proportion p(DSI)<.05	0	0	0.4	0.324324	0.324324	0.456311	0.272727
